# Supplementary material for: P-Chiral, N-phosphoryl sulfonamide Brønsted acids with an intramolecular hydrogen bond interaction that modulates organocatalysis
Source: Royal Society of Chemistry journal article supplement (doi:10.1039/c9ob01774g), 2019-01-01
Supplement: c9ob01774g1.pdf [file c9ob01774g1.pdf]

## SUPPORTING INFORMATION

### ***P*-Chiral, *N*-Phosphoryl Sulfonamide Brønsted Acids with an Intramolecular Hydrogen Bond Interaction that Modulates Organocatalysis**

Minglei Yuan,<sup>†¶</sup> Ifenna I. Mbaezue,<sup>†¶</sup> Filip Topic,<sup>†</sup> Youla S. Tsantrizos<sup>†\*</sup>

<sup>†</sup>Department of Chemistry, McGill University, 801 Sherbrooke Street West, Montreal,  
Quebec H3A 0B8, Canada.

\* Email: [youla.tsantrizos@mcgill.ca](mailto:youla.tsantrizos@mcgill.ca)

## Contents:

|                                                                                                                                                  |         |
|--------------------------------------------------------------------------------------------------------------------------------------------------|---------|
| General Experimental Methods.....                                                                                                                | S3      |
| Synthesis of secondary phosphine oxides (SPOs) <b>7</b> .....                                                                                    | S4-S5   |
| Conversion of SPOs <b>7</b> to the arylphosphinic amides <b>8</b> .....                                                                          | S5-S8   |
| Conversion of arylphosphinic amides <b>8</b> to Brønsted acids <b>3b</b> and <b>4</b> .....                                                      | S8-S11  |
| General procedure for synthesis of Brønsted acids <b>5</b> .....                                                                                 | S11-S14 |
| Transfer hydrogenation of quinolines <b>10</b> to tetrahydroquinolines <b>11</b> .....                                                           | S14-S19 |
| Tables 1 and 2.....                                                                                                                              | S20     |
| <sup>1</sup> H, <sup>13</sup> C, <sup>31</sup> P NMR Spectra and Chiral HPLC Chromatograms; <i>compounds are listed in numerical order</i> ..... | S21-S75 |
| X-Ray data collection (Table 3) and structure refinement statistics.....                                                                         | S76-S77 |
| References.....                                                                                                                                  | S78-S79 |

## General Experimental Methods

All reactions were carried out under anhydrous conditions and under an atmosphere of dry argon unless otherwise indicated. Compounds were purified by normal phase flash column chromatography on silica gel (SDS, 60 Å C. C. 40-63 mm) as the stationary phase. Thin Layer Chromatography (TLC) was performed on alumina plates pre-coated with silica gel (Merck silica gel, 60 F254), which were visualized by UV when applicable ( $\lambda_{\text{max}} = 254 \text{ nm}$  and/or  $366 \text{ nm}$ ) and/or by staining with vanillin or anisadehyde in acidic ethanol and/or  $\text{KMnO}_4$  in basic water followed by heating. Key compounds were fully characterized by  $^1\text{H}$ ,  $^{13}\text{C}\{^1\text{H}\}$  and  $^{31}\text{P}\{^1\text{H}\}$  NMR and HRMS. Chemical shifts ( $\delta$ ) are reported in ppm relative to the internal deuterated solvent or external  $\text{H}_3\text{PO}_4$  ( $\delta 0.00$   $^{31}\text{P}$ ), unless indicated otherwise. High-resolution MS spectra were recorded using electrospray ionization (ESI+/-) and Fourier transform ion cyclotron resonance mass analyzer (FTMS).

The reactions were monitored either by TLC or analytical HPLC/MS to confirm completion and homogeneity of the products. Analytical HPLC was performed using a reversed phase C18 5  $\mu\text{m}$  column on a Waters Atlantis T3 instrument and the solvent system indicated below:

Solvent A:  $\text{H}_2\text{O}$ , 0.1% formic acid

Solvent B:  $\text{CH}_3\text{CN}$ , 0.1% formic acid

Mobile phase: linear gradient from 95%A and 5%B to 5%A and 95%B in 13 min, then 2 min at 100% B

Flow rate: 1 mL/min

Compounds 6-bromo-2-methylquinoline (**10a**), 2-methylquinoline (**10b**), 2-phenylquinoline (**10c**) and 4-methylquinoline (**10d**) were purchased from Sigma Aldrich. The 2-ethylquinoline (**10e**), <sup>1</sup> 2-isopropylquinoline (**10f**), <sup>2</sup> 6-nitro-2-methylquinoline (**10g**)<sup>3</sup> and 6-methoxy-2-methylquinoline (**10h**)<sup>3</sup> were synthesized according to the literature procedures indicated.

The enantiomeric purity of chiral compounds was determined by chiral HPLC using an Agilent 1100 or Agilent 1260 series instrument and the column and solvent system indicated for each compound. The absolute stereochemistry of all compounds was assigned based on several factors, including the single crystal X-ray of the previously reported key precursor compound **6**,<sup>4</sup> the single crystal X-ray structures of intermediate phosphinic amide **8d** (refer to SI Table 3), the single crystal X-ray structures of catalysts **5a** and **5c**, the single crystal X-ray structure of compound (*S*)-2-bromo-6-methyl-3,4-dihydro-2*H*-1 $\lambda^2$ -quinoline (**11a**), and by analogy with previously reported compounds in the literature.

The names of all compounds were generated using ChemBioDraw Ultra 12.0.

### General synthesis of secondary phosphine oxides (SPOs) **7**:

We recently reported the synthesis of SPO intermediates **6**, **7a**, **7c** and **7d**.<sup>4</sup> The synthesis of analogs **7e** and **7f** was achieved using the same protocol.<sup>4</sup> The synthesis of SPO analogs **7b** was achieved using the previously reported methodology.<sup>5</sup>

#### *(S)*-tert-Butyl(2-methoxy-5,6,7,8-tetrahydronaphthalen-1-yl)phosphine oxide (**7e**):

Precursor compound 5-bromo-6-methoxy-1,2,3,4-tetrahydronaphthalene (used to prepare the Grignard reagent) was synthesized according to the method reported by Smith and co-workers.<sup>6</sup>

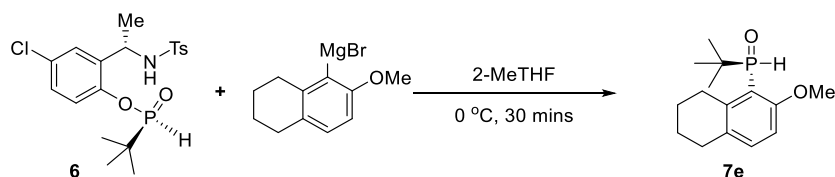

A three neck flask under argon was charged with SPO **6** (1 mmol) in 2-MeTHF (3 mL) and cooled to 0 °C. 2-Methoxy-5,6,7,8-tetrahydronaphthalen-1-yl magnesium bromide (1 M in 2-MeTHF, 4 mmol, 4 mL) was added slowly while keeping the internal temperature <5 °C. The reaction mixture was stirred for 40 min to completion. Saturated and degassed aqueous NH<sub>4</sub>Cl solution (5 mL) was added slowly to quench the reaction. The organic layer was collected and the aqueous residue was extracted with DCM (25 mL x3). The combined organic extracts were dried over anhydrous Na<sub>2</sub>SO<sub>4</sub> and concentrated. The residue was purified by flash column chromatography on silica gel (deactivated with 10% water) using a solvent gradient of hexane/EtOAc (from 50:50 to 0:100, v/v) to obtain the desired product (141 mg) in 53% yield.

<sup>1</sup>H NMR (400 MHz, CDCl<sub>3</sub>): δ 8.28 (s, 0.5 H), 7.17 (d, *J* = 8.5 Hz, 1H), 7.06 (s, 0.5 H), 6.71 (dd, *J* = 8.5, 5.1 Hz, 1H), 3.77 (s, 3H), 3.54 – 3.39 (m, 1H), 2.93 (dt, *J* = 17.0, 5.6 Hz, 1H), 2.72 (t, *J* = 6.2 Hz, 2H), 1.83 – 1.66 (m, 4H), 1.20 (d, *J* = 16.6 Hz, 9H).

<sup>31</sup>P NMR (162 MHz, CDCl<sub>3</sub>): δ 36.57.

More detailed characterization and estimation of the enantiomeric purity was performed at the subsequent step, when **7e** was converted to the corresponding *P*-chiral (*tert*-butyl)-*P*-arylphosphinic amide **8e**.

#### *(S)*-tert-Butyl(2-methoxy-6-phenylnaphthalen-1-yl)phosphine oxide (**7f**):

The precursor 1-bromo-2-methoxy-6-phenylnaphthalene (used to prepare the Grignard reagent) was synthesized according to the method reported by Smith and co-workers.<sup>6</sup>

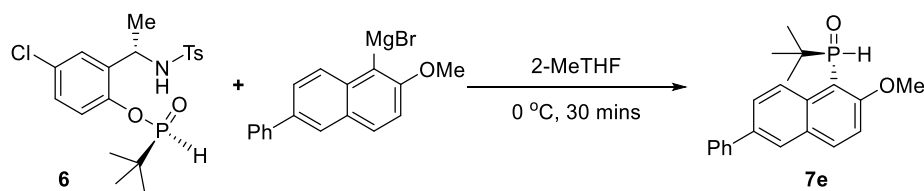

A three-neck flask under argon was charged with SPO **6** (1 mmol) dissolved in 2-MeTHF (3 mL) and cooled to 0 °C. A solution of 2-methoxy-6-phenylnaphthalen-1-yl

magnesium bromide (1 M in 2-MeTHF, 4 mmol, 4 ml; prepared as previously reported<sup>6</sup>) was added slowly, while keeping the internal temperature <5 °C. The reaction mixture was stirred for 40 min to complete the reaction. Saturated and degassed aqueous NH<sub>4</sub>Cl solution (5 mL) was added slowly to quench the reaction. The organic layer was collected and the aqueous residue was extracted with DCM (25 mL x3). The combined organic extracts were dried over anhydrous Na<sub>2</sub>SO<sub>4</sub> and concentrated. The residue was purified by silica gel chromatography (on deactivated silica with 10% water) eluted with a solvent gradient of hexane/EtOAc gradient (50:50 to 0:100, v/v) to obtain the desired product (189 mg) in 56% yield.

<sup>1</sup>H NMR (400 MHz, CDCl<sub>3</sub>): δ 9.04 (d, *J* = 9.0 Hz, 1H), 8.54 (s, 0.5 H), 8.07 (d, *J* = 9.1 Hz, 1H), 7.98 (s, 1H), 7.81 (dd, *J* = 9.0, 2.1 Hz, 1H), 7.70 (d, *J* = 7.1 Hz, 2H), 7.48 (t, *J* = 7.7 Hz, 2H), 7.37 (t, *J* = 7.4 Hz, 1H), 7.31 (s, 0.5 H), 7.30 – 7.26 (m, 1H), 3.98 (s, 3H), 1.26 (d, *J* = 16.8 Hz, 9H).

<sup>31</sup>P NMR (162 MHz, CDCl<sub>3</sub>): δ 36.19.

More detailed characterization and estimation of the enantiomeric purity was performed at the subsequent step, when **7f** was converted to the corresponding *P*-chiral (*tert*-butyl)-*P*-arylphosphinic amide **8f**.

General procedure for the conversion of SPOs **7** to the *P*-Chiral (*t*-butyl)-*P*-arylphosphinic amides **8**:

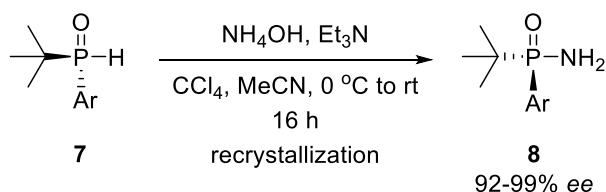

Chiral SPO **7** (1.0 mmol) was dissolved in 6 mL of degassed acetonitrile and cooled to 0 °C. CCl<sub>4</sub> (1.0 mL), Et<sub>3</sub>N (2.0 mmol) and saturated aqueous solution of NH<sub>4</sub>OH (28% in water, 0.5 mL) were sequentially added dropwise while stirring. The solution was stirred at 0 °C for 30 min and then warmed to RT and allowed to stir for 16 h. Water (5 mL) was added to the reaction mixture and then extracted with EtOAc, the organic layers were combined, dried over anhydrous Na<sub>2</sub>SO<sub>4</sub> and concentrated to give the crude product. The pure product was obtained after first passing the crude through a short silica gel column and then doing a crystallization in DCM/Et<sub>2</sub>O (1:5, v/v) at -20 °C to obtain the phosphoramidate products as highly enriched single enantiomers (92-99% ee).

(*R*)-*P*-(*tert*-butyl)-*P*-phenylphosphinic amide (**8a**); characterization data consistent with previously reported.<sup>7</sup>

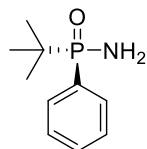

Isolated as a white solid in 82% yield (162 mg) and 96.7% ee.

<sup>1</sup>H NMR (500 MHz, CDCl<sub>3</sub>): δ 7.90–7.84 (m, 2H), 7.57–7.52 (m, 1H), 7.49–7.43 (m, 2H), 2.72 (brs, 2H), 1.16 (d, *J* = 15.3 Hz, 9H).

<sup>31</sup>P NMR (202 MHz, CDCl<sub>3</sub>): δ 41.34.

Chiral HPLC method: Chiralcel OD, hexane/IPA = 80/20, 1.0 mL/min, λ = 220 nm; (*R*)-enantiomer *t*<sub>R</sub> (major) = 5.88 min, (*S*)-enantiomer *t*<sub>R</sub> (minor) = 7.60 min.

(*R*)-*P*-(*tert*-butyl)-*P*-(2-methoxyphenyl)phosphinic amide (**8b**):

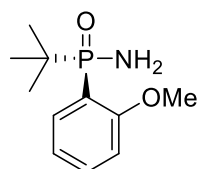

Isolated as a white solid in 73% yield (166 mg) and 95% ee.

<sup>1</sup>H NMR (500 MHz, CDCl<sub>3</sub>): δ 7.90 (ddd, *J* = 11.9, 7.5, 1.8 Hz, 1H), 7.49 – 7.40 (m, 1H), 7.10 – 7.02 (m, 1H), 6.93 – 6.87 (m, 1H), 3.83 (s, 3H), 3.17 (s, 2H), 1.08 (d, *J* = 15.9 Hz, 9H).

<sup>13</sup>C NMR (126 MHz, CDCl<sub>3</sub>): δ 159.2 (d, *J* = 3.9 Hz), 135.5 (dd, *J* = 5.5, 3.0 Hz), 133.3, 121.0 (dd, *J* = 10.6, 2.5 Hz), 119.4 (d, *J* = 101.4 Hz), 110.6 (d, *J* = 7.0 Hz), 55.2, 34.3 (d, *J* = 93.7 Hz), 24.2.

<sup>31</sup>P NMR (203 MHz, CDCl<sub>3</sub>): δ 46.01.

HRMS: calculated for C<sub>11</sub>H<sub>18</sub>NNaO<sub>2</sub>P<sup>+</sup> [M+H]<sup>+</sup>: 250.0967, found: 250.0967.

Chiral HPLC method: Chiralcel OD, hexane/IPA = 80/20, 1.0 mL/min, λ = 220 nm; (*S*)-enantiomer *t*<sub>R</sub> (minor) = 7.38 min, (*R*)-enantiomer *t*<sub>R</sub> (major) = 10.23 min.

(*R*)-*P*-(*tert*-butyl)-*P*-(4-methoxyphenyl)phosphinic amide (**8c**)

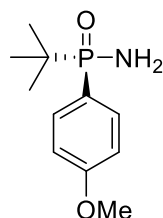

Isolated as a white solid in 48% yield (109 mg) and >99% ee.

<sup>1</sup>H NMR (500 MHz, CDCl<sub>3</sub>) δ 7.77 – 7.70 (m, 2H), 6.92 (dd, *J* = 8.9, 2.4 Hz, 2H), 3.83 (s, 3H), 2.84 (s, 2H), 1.11 (d, *J* = 15.2 Hz, 9H).

<sup>13</sup>C NMR (126 MHz, CDCl<sub>3</sub>): δ 162.4 (d, *J* = 2.9 Hz), 135.0 (d, *J* = 9.6 Hz), 121.4 (d,

$J = 123.0$  Hz), 113.6 (d,  $J = 12.5$  Hz), 55.2, 32.3 (d,  $J = 93.5$  Hz), 24.8.

$^{31}\text{P}$  NMR (203 MHz,  $\text{CDCl}_3$ ):  $\delta$  41.44.

HRMS: calculated for  $\text{C}_{11}\text{H}_{18}\text{NNaO}_2\text{P}^+$   $[\text{M}+\text{H}]^+$ : 250.0967, found: 250.0968.

Chiral HPLC method: Chiralcel OD, hexane/IPA = 80/20, 1.0 mL/min,  $\lambda = 220$  nm;

(*R*)-enantiomer  $t_{\text{R}}$  (major) = 7.08 min, (*S*)-enantiomer  $t_{\text{R}}$  (minor) = 12.49 min.

(*R*)-*P*-(*tert*-butyl)-*P*-(2-methoxynaphthalen-1-yl)phosphinic amide (**8d**)

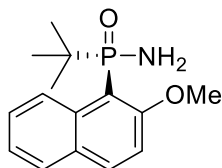

Isolated as a white solid in 42% yield (116 mg) and >99% ee.

$^1\text{H}$  NMR (400 MHz,  $\text{CDCl}_3$ ):  $\delta$  9.59 (d,  $J = 8.5$  Hz, 1H), 7.99 (d,  $J = 9.1$  Hz, 1H), 7.76 (dt,  $J = 8.2, 1.7$  Hz, 1H), 7.54 (ddd,  $J = 8.6, 6.7, 1.5$  Hz, 1H), 7.38 (ddd,  $J = 8.0, 6.8, 1.2$  Hz, 1H), 7.31 – 7.23 (m, 1H), 3.99 (s, 3H), 3.22 (s, 2H), 1.16 (d,  $J = 16.0$  Hz, 9H).

$^{13}\text{C}$  NMR (101 MHz,  $\text{CDCl}_3$ ):  $\delta$  158.7 (d,  $J = 3.2$  Hz), 136.7 (d,  $J = 6.7$  Hz), 134.7, 129.4 (d,  $J = 9.1$  Hz), 128.0, 127.6 (d,  $J = 2.2$  Hz), 127.5, 124.2, 112.8, 111.9, 111.8, 56.0, 35.9 (d,  $J = 93.2$  Hz), 24.4.

$^{31}\text{P}$  NMR (162 MHz,  $\text{CDCl}_3$ ):  $\delta$  50.06.

HRMS: calculated for  $\text{C}_{15}\text{H}_{20}\text{NNaO}_2\text{P}^+$   $[\text{M}+\text{H}]^+$ : 300.1124, found: 300.1115.

Chiral HPLC method: Chiralcel OD, hexane/IPA = 80/20, 1.0 mL/min,  $\lambda = 220$  nm; (*S*)-enantiomer  $t_{\text{R}} = 8.46$  min, (*R*)-enantiomer  $t_{\text{R}}$  (single peak) = 28.96 min.

(*R*)-*P*-(*tert*-butyl)-*P*-(2-methoxy-5,6,7,8-tetrahydronaphthalen-1-yl)phosphinic amide (**8e**)

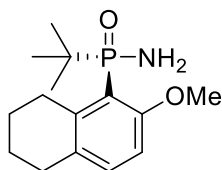

Isolated as a white solid in 45% yield (126 mg) and >99% ee.

$^1\text{H}$  NMR (500 MHz,  $\text{CDCl}_3$ ):  $\delta$  7.15 (d,  $J = 8.5$  Hz, 1H), 6.72 (dd,  $J = 8.5, 4.8$  Hz, 1H), 3.79 (s, 3H), 3.65 – 3.56 (m, 1H), 3.20 (dt,  $J = 17.7, 5.7$  Hz, 1H), 3.12 (s, 2H), 2.72 (t,  $J = 6.6$  Hz, 2H), 1.86 – 1.77 (m, 1H), 1.75 – 1.66 (m, 2H), 1.65 – 1.55 (m, 1H), 1.13 (d,  $J = 15.8$  Hz, 9H).

$^{13}\text{C}$  NMR (126 MHz,  $\text{CDCl}_3$ ):  $\delta$  158.09 (d,  $J = 4.6$  Hz), 145.82 (d,  $J = 7.0$  Hz), 133.25 (d,  $J = 2.1$  Hz), 131.73 (d,  $J = 10.3$  Hz), 117.61 (d,  $J = 95.2$  Hz), 108.24 (d,  $J = 7.4$  Hz), 55.16, 35.83 (d,  $J = 91.8$  Hz), 29.87, 28.51 (d,  $J = 2.2$  Hz), 24.41 (d,  $J = 0.9$  Hz), 22.39 (d,  $J = 84.5$  Hz).

$^{31}\text{P}$  NMR (203 MHz,  $\text{CDCl}_3$ ):  $\delta$  50.18.

HRMS: calculated for  $C_{15}H_{24}NNaO_2P^+$   $[M+H]^+$ : 304.1437, found: 304.1142.

Chiral HPLC method: Chiralcel OD, hexane/IPA = 80/20, 1.0 mL/min,  $\lambda = 220$  nm; (*S*)-enantiomer  $t_R = 4.96$  min, (*R*)-enantiomer  $t_R$  (single peak) = 6.20 min.

(*R*)-*P*-(*tert*-butyl)-*P*-(2-methoxy-6-phenylnaphthalen-1-yl)phosphinic amide (**8f**)

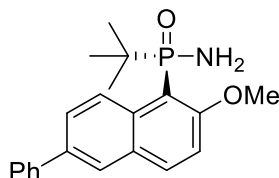

Isolated as a white solid in 60% yield (212 mg) and >99% ee.

$^1H$  NMR (500 MHz,  $CDCl_3$ ):  $\delta$  9.64 (d,  $J = 9.1$  Hz, 1H), 8.00 (d,  $J = 9.0$  Hz, 1H), 7.94 (s, 1H), 7.80 (dd,  $J = 9.1, 2.1$  Hz, 1H), 7.70 (d,  $J = 7.0$  Hz, 2H), 7.47 (t,  $J = 7.7$  Hz, 2H), 7.36 (t,  $J = 7.4$  Hz, 1H), 7.24 (dd,  $J = 9.0, 4.3$  Hz, 1H), 3.95 (s, 3H), 3.31 (brs, 2H), 1.17 (d,  $J = 16.1$  Hz, 9H).

$^{13}C$  NMR (126 MHz,  $CDCl_3$ ):  $\delta$  158.7 (d,  $J = 3.2$  Hz), 140.6, 136.5, 135.9 (d,  $J = 6.7$  Hz), 134.9 (d,  $J = 2.1$  Hz), 129.7 (d,  $J = 9.0$  Hz), 128.9, 128.2 (d,  $J = 2.1$  Hz), 127.3, 127.2, 127.0, 125.63, 112.4 (d,  $J = 93.6$  Hz), 112.3 (d,  $J = 7.7$  Hz), 56.0, 35.9 (d,  $J = 93.2$  Hz), 24.4.

$^{31}P$  NMR (203 MHz,  $CDCl_3$ ):  $\delta$  50.11.

HRMS: calculated for  $C_{21}H_{25}NO_2P^+$   $[M+H]^+$ : 354.1617, found: 354.1618.

Chiral HPLC method: Chiralcel OD, hexane/IPA = 80/20, 1.0 mL/min,  $\lambda = 220$  nm; (*S*)-enantiomer  $t_R = 10.91$  min, (*R*)-enanatiomer (single peak)  $t_R = 15.34$  min.

#### General procedure for the conversion of arylphosphinic amides **8** to Brønsted acids **3b** and **4**:

A slurry of NaH (3 equiv of 60% NaH in oil) in anhydrous THF (3.0 mL) at 0 °C was added to a solution of phosphinamide **8** (0.5 mmol, 1 equiv) and the mixture was stirred for 30 min. The arylsulfonyl chloride (1.5 equiv) was added slowly, and the mixture was warmed to RT and monitored by TLC. After complete conversion (~12-15 h),  $NH_4Cl$  (0.1 g) was added portion-wise, the mixture was diluted with THF and filtered. The filtrate was concentrated and the crude residue was purified by flash column chromatography on silica gel to give the desired product. The product was dissolved in DCM (15 mL) and thoroughly washed with 4 M HCl (2x) to remove any salt impurities and completely protonate the catalyst. The organic layer was separated and concentrated under reduced pressure. The residue was taken up in toluene (5 mL), evaporated to dryness again and dried under high vacuum for 24 h to give the catalyst.

Note: Upon completion of the coupling reaction between intermediate **8** and the sulfonyl chloride, some analogs **4** were used directly in the subsequent demethylation step (without isolation/purification) to get the final catalysts **5**.



*(R)*-*N*-(*tert*-butyl(2-methoxyphenyl)phosphoryl)-2,4,6-triisopropylbenzenesulfonamide (**3b**): This compound was recently reported by Han and coworkers.<sup>8</sup>

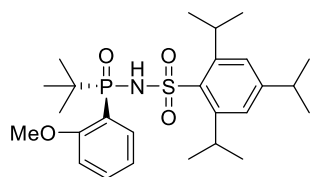

Isolated as a yellow solid in 97% yield (240 mg).

<sup>1</sup>H NMR (500 MHz, CD<sub>3</sub>OD): δ 7.74 (ddd, *J* = 7.0, 1.5 Hz, 1H), 7.37 (t, *J* = 7.3 Hz, 1H), 7.11 (s, 2H), 6.91 (dd, *J* = 7.8, 5.3 Hz, 1H), 6.77 (t, *J* = 7.0 Hz, 1H), 4.49 - 4.40 (m, 2H), 3.54 (s, 3H), 2.88 (hept, *J* = 6.9 Hz, 1H), 1.27 - 1.21 (m, 12H), 1.14 - 1.04 (m, 15H).

<sup>31</sup>P NMR (202 MHz, CD<sub>3</sub>OD): δ 33.97;

HRMS: calculated for C<sub>26</sub>H<sub>40</sub>NO<sub>4</sub>PSNa [M+Na]: 516.2308, found: 516.2305.

*(R)*-*N*-(*tert*-butyl(phenyl)phosphoryl)-2,4,6-triisopropylbenzenesulfonamide (**4a**):

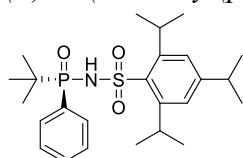

Isolated as a yellow solid in 96% yield (223 mg).

<sup>1</sup>H NMR (500 MHz, CD<sub>3</sub>OD): δ 7.66-7.62 (m, 2H), 7.35 (td, *J* = 7.5, 1.5 Hz, 1H), 7.22 (td, *J* = 8.0, 3.0 Hz, 2H), 7.04 (s, 2H), 4.51-4.45 (m, 2H), 2.88-2.82 (m, 1H), 1.23 (d, *J* = 7.0 Hz, 6H), 1.21 (d, *J* = 6.5 Hz, 6H), 1.06 (d, *J* = 7.0 Hz, 6H), 1.01 (d, *J* = 15.5 Hz, 9H);

<sup>13</sup>C NMR (125 MHz, CD<sub>3</sub>OD): δ 150.8, 149.2, 142.7, 134.8 (d, *J* = 112.0 Hz), 134.5 (d, *J* = 8.1 Hz), 131.3 (d, *J* = 1.8 Hz), 128.1 (d, *J* = 10.9 Hz), 123.6, 35.3, 33.9 (d, *J* = 103.8 Hz), 30.2, 25.6, 25.2, 25.1, 24.33, 24.30;

<sup>31</sup>P NMR (202 MHz, CD<sub>3</sub>OD): δ 31.74;

HRMS: calculated for C<sub>25</sub>H<sub>38</sub>NO<sub>3</sub>PSNa [M+Na]<sup>+</sup>: 486.2202, found: 486.2194.

*(R)*-*N*-(*tert*-butyl(4-methoxyphenyl)phosphoryl)-2,4,6-triisopropylbenzenesulfonamide (**4b**):

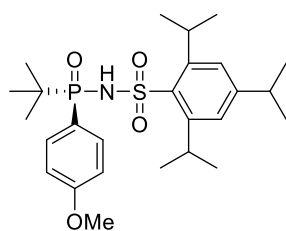

Upon completion of the coupling reaction with the sulfonyl chloride, compound **4b** was used directly in the subsequent demethylation step to get the final catalyst **5b**.

*(R)*-*N*-(*tert*-butyl(2-methoxynaphthalen-1-yl)phosphoryl)-2,4,6-triisopropylbenzenesulfonamide (**4c**):

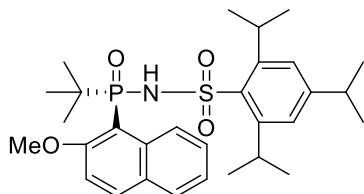

Compound was isolated as a white solid in 98% yield (173 mg).

$^1\text{H}$  NMR (500 MHz,  $\text{CDCl}_3$ ):  $\delta$  9.43 (d,  $J = 8.9$  Hz, 1H), 8.02 (d,  $J = 9.1$  Hz, 1H), 7.75 (d,  $J = 8.0$  Hz, 1H), 7.56 – 7.43 (m, 2H), 7.37 (t,  $J = 8.0$  Hz, 1H), 7.32 – 7.27 (m, 1H), 7.05 (s, 2H), 4.16 (hept,  $J = 6.5$  Hz, 2H), 4.10 (s, 3H), 2.81 (hept,  $J = 7.0$  Hz, 1H), 1.31 – 1.11 (m, 21H), 1.10 (d,  $J = 6.8$  Hz, 6H).

$^{13}\text{C}$  NMR (126 MHz,  $\text{CDCl}_3$ ):  $\delta$  158.42, 152.56, 150.27, 136.80 (d,  $J = 7.6$  Hz), 135.92 (d,  $J = 2.3$  Hz), 135.43, 129.60 (d,  $J = 10.0$  Hz), 128.28, 127.99, 127.57 (d,  $J = 2.3$  Hz), 124.64, 123.75, 111.89 (d,  $J = 8.2$  Hz), 110.79, 110.03, 56.53, 37.40 (d,  $J = 89.4$  Hz), 34.18, 29.91, 24.91 (d,  $J = 3.4$  Hz), 24.60, 23.63 (d,  $J = 5.8$  Hz).

$^{31}\text{P}$  NMR (203 MHz,  $\text{CDCl}_3$ ):  $\delta$  43.1.

HRMS: calculated for  $\text{C}_{30}\text{H}_{41}\text{O}_4\text{NPS}$ : 542.2499, found: 542.2491.

*(R)*-*N*-(*tert*-butyl(2-methoxy-5,6,7,8-tetrahydronaphthalen-1-yl)phosphoryl)-2,4,6-triisopropylbenzenesulfonamide (**4d**):

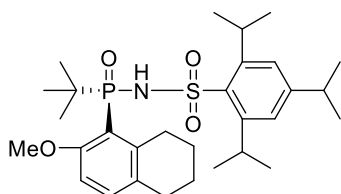

$^1\text{H}$  NMR (500 MHz,  $\text{CDCl}_3$ ):  $\delta$  7.47 (s, 1H), 7.17 (d,  $J = 8.5$  Hz, 1H), 7.08 (s, 2H), 6.74 (dd,  $J = 8.5, 5.2$  Hz, 1H), 4.18 (hept,  $J = 6.7$  Hz, 2H), 3.89 (s, 3H), 3.40 (dt,  $J = 18.0, 6.2$  Hz, 1H), 3.03 (dt,  $J = 17.9, 5.5$  Hz, 1H), 2.85 (hept,  $J = 6.9$  Hz, 1H), 2.74 – 2.64 (m, 2H), 1.73 – 1.56 (m, 4H), 1.26 (d,  $J = 6.7$  Hz, 6H), 1.24 – 1.15 (m, 15H), 1.13 (d,  $J = 6.7$  Hz, 6H).

$^{31}\text{P}$  NMR (203 MHz,  $\text{CDCl}_3$ ):  $\delta$  44.0.

Upon completion of the coupling reaction with the sulfonyl chloride, the crude compound **4d** was used directly in the subsequent demethylation step to get the final catalyst **5d**.

(*R*)-*N*-(*tert*-butyl(2-methoxy-6-phenylnaphthalen-1-yl)phosphoryl)-2,4,6-triisopropylbenzenesulfonamide (**4e**):

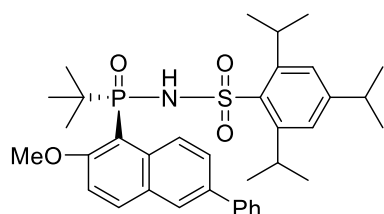

$^1\text{H}$  NMR (500 MHz,  $\text{CDCl}_3$ )  $\delta$  9.51 (d,  $J = 9.2$  Hz, 1H), 8.08 (d,  $J = 9.1$  Hz, 1H), 7.95 (t,  $J = 2.1$  Hz, 1H), 7.75 (dd,  $J = 9.2, 2.1$  Hz, 1H), 7.68 (dd,  $J = 8.3, 1.3$  Hz, 2H), 7.52 (d,  $J = 6.4$  Hz, 1H), 7.47 (t,  $J = 7.7$  Hz, 2H), 7.39 – 7.34 (m, 1H), 7.31 (dd,  $J = 9.1, 4.7$  Hz, 1H), 7.06 (s, 2H), 4.18 (hept,  $J = 6.7$  Hz, 2H), 4.11 (s, 3H), 2.81 (hept,  $J = 6.8$  Hz, 1H), 1.26 – 1.20 (m, 15H), 1.18 (dd,  $J = 6.9, 2.4$  Hz, 6H), 1.12 (d,  $J = 6.7$  Hz, 6H).

$^{31}\text{P}$  NMR (203 MHz,  $\text{CDCl}_3$ ):  $\delta$  43.2.

Upon completing of the coupling reaction with the sulfonyl chloride, compound **4e** the crude product was used directly in the subsequent demethylation step to get the final catalyst **5e**.

#### General procedure for the synthesis of Brønsted acids **5**:

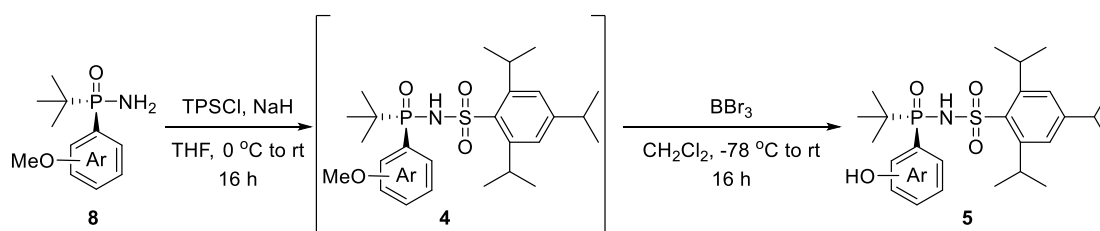

**Note:** Upon completion of the coupling reaction between intermediate **8** and the sulfonyl chloride, some analogs **4** were used directly in the subsequent demethylation step to get the final catalysts **5**.

**Demethylation step:** A solution of intermediates **3b** or **4** in dry DCM (5 mL) was cooled to  $-78$  °C, then  $\text{BBr}_3$  (1.2 equiv in hexane) was added slowly over a 5 min period. After the addition was finished, the reaction mixture was allowed to warm-up to RT and stirred overnight. The reaction was quenched with water and diluted with DCM. The organic fraction was washed with 1 N HCl, dried over anhydrous  $\text{MgSO}_4$ , concentrated and purified by flash column chromatography on silica gel. The isolated product was re-dissolved in DCM (15 mL) and thoroughly washed with 4 M HCl (15 mL x 2) to remove any metal impurities and completely protonate the catalyst. The organic layer

was separated and concentrated under reduced pressure. The residue was taken up in toluene (5 mL), evaporated to dryness again and allowed to dry under high vacuum for a minimum of 24 h to give (*R*)-phenolic catalyst.

*(R)*-*N*-(*tert*-butyl(2-hydroxyphenyl)phosphoryl)-2,4,6-triisopropylbenzenesulfonamide (**5a**):

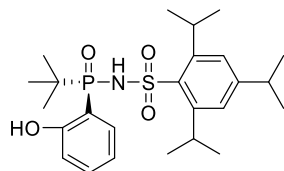

Compound was isolated as a yellow solid in 92% yield (221 mg).

$^1\text{H}$  NMR (400 MHz,  $\text{CDCl}_3$ ):  $\delta$  10.60 (s, 1H), 7.42 (ddt,  $J = 8.4, 7.1, 1.4$  Hz, 1H), 7.31–7.23 (m, 1H), 7.14 (s, 2H), 6.97 – 6.89 (m, 1H), 6.84 – 6.75 (m, 1H), 6.41 (d,  $J = 8.7$  Hz, 1H), 3.91 (hept,  $J = 6.6$  Hz, 2H), 2.90 (hept,  $J = 6.9$  Hz, 1H), 1.30 – 1.14 (m, 27H).  
 $^{13}\text{C}$  NMR (126 MHz,  $\text{CDCl}_3$ ):  $\delta$  163.6 (d,  $J = 5.0$  Hz), 153.7, 150.3, 135.1 (d,  $J = 2.1$  Hz), 134.2 (s), 133.0 (d,  $J = 8.4$  Hz), 123.9, 118.8 (d,  $J = 12.5$  Hz), 118.0 (d,  $J = 9.3$  Hz), 107.5 (d,  $J = 117.5$  Hz), 34.6 (d,  $J = 86.2$  Hz), 34.2, 30.1, 24.7 (d,  $J = 47.0$  Hz), 23.8, 23.5 (d,  $J = 4.2$  Hz).

$^{31}\text{P}$  NMR (162 MHz,  $\text{CDCl}_3$ ):  $\delta$  45.42.

HRMS: calculated for  $\text{C}_{25}\text{H}_{39}\text{NO}_4\text{PS}^+$   $[\text{M}+\text{H}]^+$ : 480.2332, found: 480.2336.

*(R)*-*N*-(*tert*-butyl(4-hydroxyphenyl)phosphoryl)-2,4,6-triisopropylbenzenesulfonamide: (**5b**)

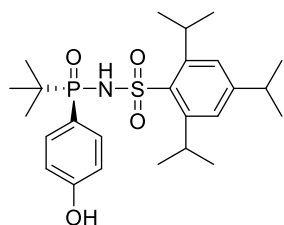

Isolated as a yellow solid, in 80% yield (193 mg).

$^1\text{H}$  NMR (500 MHz, MeOD):  $\delta$  7.51–7.44 (m, 2H), 7.17 (s, 2H), 6.77 (dd,  $J = 8.5, 2.5$  Hz, 2H), 4.27–4.14 (m, 2H), 2.96–2.87 (m, 1H), 1.31–1.20 (m, 12H), 1.18–1.03 (m, 15H).

$^{13}\text{C}$  NMR (126 MHz, MeOD):  $\delta$  161.4, 152.4, 149.6, 136.6, 134.8 (d,  $J = 11.0$  Hz), 123.1, 116.5 (d,  $J = 125.4$  Hz), 114.7 (d,  $J = 13.8$  Hz), 34.0, 33.1 (d,  $J = 93.4$  Hz), 28.9, 23.8 (d,  $J = 38.7$  Hz), 23.0, 22.7 (d,  $J = 6.2$  Hz).

$^{31}\text{P}$  NMR (203 MHz, MeOD):  $\delta$  41.15.

HRMS: calculated for  $\text{C}_{25}\text{H}_{39}\text{NO}_4\text{PS}^+$   $[\text{M}+\text{H}]^+$ : 480.2332, found: 480.2335.

*(R)*-*N*-(*tert*-butyl(2-hydroxynaphthalen-1-yl)phosphoryl)-2,4,6-triisopropylbenzenesulfonamide (**5c**):

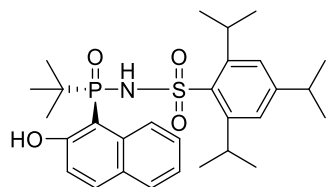

Isolated as a yellow solid in 95% yield (252 mg).

$^1\text{H}$  NMR (400 MHz,  $\text{CDCl}_3$ ):  $\delta$  12.55 (s, 1H), 8.15 (m, 1H), 7.88 (d,  $J = 8.9$  Hz, 1H), 7.70 (m, 1H), 7.25 – 7.20 (m, 2H), 7.15 – 7.06 (m, 3H), 6.56 (s, 1H), 3.88 (hept,  $J = 6.7$  Hz, 2H), 2.88 (hept,  $J = 6.9$  Hz, 1H), 1.36 – 1.14 (m, 21H), 1.11 (d,  $J = 6.7$  Hz, 6H).

$^{13}\text{C}$  NMR (126 MHz,  $\text{CDCl}_3$ ):  $\delta$  166.5 (d,  $J = 4.8$  Hz), 153.4, 150.1, 136.5 (d,  $J = 2.3$  Hz), 134.6, 133.6 (d,  $J = 8.6$  Hz), 128.4 (d,  $J = 10.2$  Hz), 128.0 (d,  $J = 197.2$  Hz), 125.5 (d,  $J = 4.2$  Hz), 123.9, 123.2, 120.4 (d,  $J = 11.1$  Hz), 36.8 (d,  $J = 85.8$  Hz), 34.2, 30.2, 24.8, 24.7 (d,  $J = 39.8$  Hz), 23.5 (d,  $J = 4.6$  Hz).

$^{31}\text{P}$  NMR (162 MHz,  $\text{CDCl}_3$ ):  $\delta$  47.72.

HRMS: calculated for  $\text{C}_{29}\text{H}_{41}\text{NO}_4\text{PS}^+$   $[\text{M}+\text{H}]^+$ : 530.2488, found: 530.2496.

*(R)*-*N*-(*tert*-butyl(2-hydroxy-5,6,7,8-tetrahydronaphthalen-1-yl)phosphoryl)-2,4,6-triisopropylbenzenesulfonamide (**5d**):

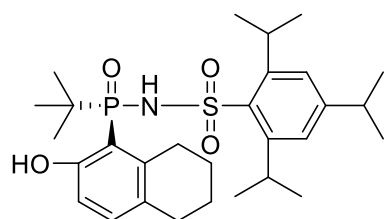

Isolated as a yellow solid in 93% yield (248 mg).

$^1\text{H}$  NMR (400 MHz,  $\text{CDCl}_3$ ):  $\delta$  11.50 (s, 1H), 7.17 (s, 2H), 7.14 (d,  $J = 8.4$  Hz, 1H), 6.75 (dd,  $J = 8.4, 5.2$  Hz, 1H), 6.19 (d,  $J = 10.9$  Hz, 1H), 3.97 (hept,  $J = 6.5$  Hz, 2H), 3.13 (ddd,  $J = 15.9, 10.1, 5.4$  Hz, 1H), 2.95 – 2.78 (m, 2H), 2.75 – 2.67 (m, 2H), 1.98 – 1.68 (m, 4H), 1.31 (d,  $J = 6.6$  Hz, 6H), 1.27 – 1.22 (m, 12H), 1.18 (d,  $J = 16.6$  Hz, 9H).

$^{13}\text{C}$  NMR (126 MHz,  $\text{CDCl}_3$ ):  $\delta$  162.9 (d,  $J = 5.6$  Hz), 153.3, 150.2, 140.3 (d,  $J = 9.1$  Hz), 136.0, 135.0, 128.9 (d,  $J = 10.4$  Hz), 124.0, 116.4 (d,  $J = 11.0$  Hz), 106.3 (d,  $J = 109.8$  Hz), 36.2 (d,  $J = 83.9$  Hz), 34.1, 30.3, 29.5, 24.8 (d,  $J = 84.6$  Hz), 24.8 (d,  $J = 14.8$  Hz), 24.3, 23.6, 22.4, 22.1.

$^{31}\text{P}$  NMR (162 MHz,  $\text{CDCl}_3$ ):  $\delta$  49.00.

HRMS: calculated for  $\text{C}_{29}\text{H}_{45}\text{NO}_4\text{PS}^+$   $[\text{M}+\text{H}]^+$ : 534.2801, found: 534.2808.

(*R*)-*N*-(*tert*-butyl(2-hydroxy-6-phenylnaphthalen-1-yl)phosphoryl)-2,4,6-triisopropylbenzenesulfonamide (**5e**):

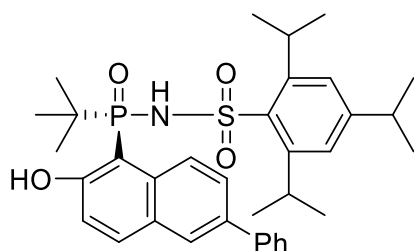

Isolated as a yellow solid in 88% yield (267 mg).

$^1\text{H}$  NMR (500 MHz,  $\text{CDCl}_3$ )  $\delta$  12.49 (s, 1H), 8.30 (d,  $J = 8.9$  Hz, 1H), 7.85 (d,  $J = 8.9$  Hz, 1H), 7.64 (s, 1H), 7.44 – 7.30 (m, 6H), 7.17 (s, 2H), 7.13 (dd,  $J = 8.9, 4.7$  Hz, 1H), 3.98 (hept,  $J = 6.7$  Hz, 2H), 2.89 (hept,  $J = 6.9$  Hz, 1H), 1.35 (d,  $J = 6.7$  Hz, 6H), 1.28 – 1.12 (m, 21H).

$^{13}\text{C}$  NMR (126 MHz,  $\text{CDCl}_3$ ):  $\delta$  166.2 (d,  $J = 4.3$  Hz), 153.6, 150.6, 140.0, 136.8, 135.3, 134.7, 132.9 (d,  $J = 8.7$  Hz), 128.6 (d,  $J = 10.1$  Hz), 128.3, 126.9, 126.6 (d,  $J = 126.9$  Hz), 126.3 (d,  $J = 4.1$  Hz), 124.0, 120.3 (d,  $J = 10.8$  Hz), 98.3 (d,  $J = 111.8$  Hz), 36.9 (d,  $J = 85.1$  Hz), 34.2, 30.3, 25.2, 24.6, 23.5 (d,  $J = 6.9$  Hz).

$^{31}\text{P}$  NMR (203 MHz,  $\text{CDCl}_3$ ):  $\delta$  48.88.

HRMS: calculated for  $\text{C}_{35}\text{H}_{45}\text{NO}_4\text{PS}^+$   $[\text{M}+\text{H}]^+$ : 606.2801, found: 606.2803.

General procedure for the transfer hydrogenation of quinolines **10** to the tetrahydroquinolines **11**:

*General procedure for the synthesis of the racemic tetrahydroquinolines:*

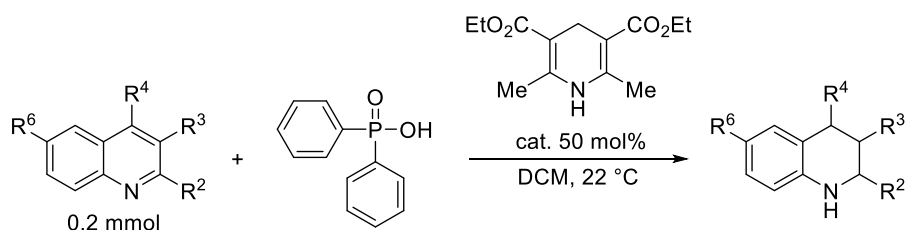

An oven dried 2 dram vial equipped with a stir bar was cooled to ambient temperature in a desiccator and subsequently charged with the requisite quinoline (0.200 mmol). 1 mL of DCM, Hantzsch ester (152 mg, 0.600 mmol) and diphenylphosphinic acid (21.8 mg, 0.500 mmol). The vial was capped under air, sealed with parafilm and the mixture was stirred at RT for 2-24 h. Progress of the reaction was monitored by TLC (20% EtOAc and 80% hexanes). The crude product was purified by flash chromatography on silica gel (using EtOAc/hexanes) to afford the desired tetrahydroquinoline.

General procedure for the asymmetric transfer hydrogenation of quinolines **10** to the tetrahydroquinolines **11**:

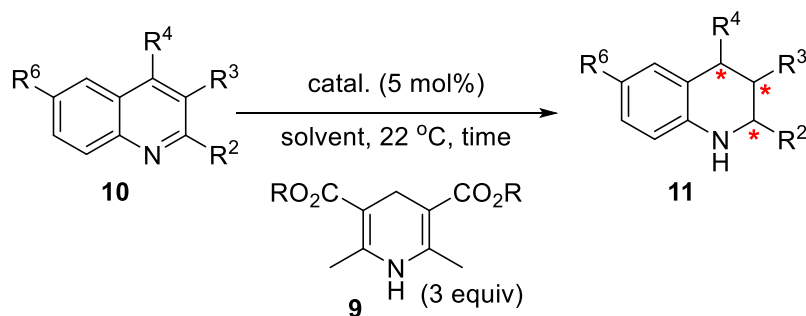

An oven-dried flask was fitted with magnetic stirring bar and charged with the quinoline (reactions were typically carried out at a 0.1-0.2 mmol scale), catalyst (5 mol%), Hantzsch ester (3.0 equiv) and solvent (0.5 mL). The resulting mixture was stirred at RT (~22 °C), unless otherwise indicated and monitored by TLC. When all starting material was consumed, the solvent was removed under reduced pressure and the residue was purified by flash column chromatography on silica gel using the solvent system indicated to isolate the corresponding product.

(*S*)-6-bromo-2-methyl-1,2,3,4-tetrahydroquinoline (**11a**):

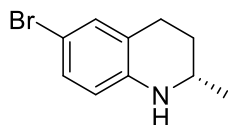

Reaction time: 5 h using catalyst **5c**. Known compound<sup>9</sup>, purified using a 0-2% EtOAc/hexanes eluent gradient; isolated as white solid in 98% yield (44.2 mg) and 88% ee. The compound was crystallized from DCM/hexanes to afford the tetrahydroquinoline **11e** in 93% ee.

<sup>1</sup>H NMR (500 MHz, CDCl<sub>3</sub>): δ 7.09 – 7.05 (d, *J* = 2.4 Hz, 1H), 7.03 (dd, *J* = 8.4, 2.4 Hz, 1H), 6.34 (d, *J* = 8.4 Hz, 1H), 3.76 (s, 1H), 3.38 (dq, *J* = 9.3, 6.3, 2.9 Hz, 1H), 2.80 (ddd, *J* = 17.0, 11.5, 5.7 Hz, 1H), 2.75 – 2.64 (dt, 1H), 1.98 – 1.87 (m, 1H), 1.55 (m, 1H), 1.20 (d, *J* = 6.3 Hz, 3H).

<sup>13</sup>C NMR (101 MHz, CDCl<sub>3</sub>): δ 143.9, 131.8, 129.5, 123.3, 115.5, 108.4, 47.2, 29.8, 26.5, 22.6.

Chiral HPLC method: Chiralpak OD-H, hexane/IPA = 98/2, 1.0 mL/min, λ = 254 nm; (*R*)-enantiomer *t<sub>R</sub>* (minor) = 8.6 min, (*S*)-enantiomer *t<sub>R</sub>* (major) = 11.2 min.

For the purpose of comparison the product was also analyzed using the same chiral HPLC column and solvent system as previously reported:<sup>9</sup> Chiralcel OJ-H, hexane/IPA = 95/5, 0.8 mL/min, λ = 254 nm; (*S*)-enantiomer *t<sub>R</sub>* (major) = 19.04 min, (*R*)-enantiomer *t<sub>R</sub>* (minor) = 23.19 min.

*(S)*-2-methyl-1,2,3,4-tetrahydroquinoline (**11b**):

NMR and chiral HPLC data consistent with those previously reported.<sup>10</sup>

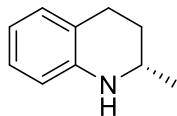

Compound was purified using a 0-1% EtOAc/hexanes as the eluent; isolated as a pale-yellow oil in 73% yield (21.6 mg) and 88% ee.

<sup>1</sup>H NMR (500 MHz, CDCl<sub>3</sub>): δ 7.02 – 6.90 (m, 2H), 6.60 (td, *J* = 7.3, 1.2 Hz, 1H), 6.47 (dd, *J* = 8.4, 1.2 Hz, 1H), 3.70 (broad s, 1H), 3.40 (dq, *J* = 10.0, 6.3, 2.8 Hz, 1H), 2.90 – 2.78 (m, 1H), 2.73 (ddd, *J* = 16.3, 5.2, 3.4 Hz, 1H), 1.93 (dddd, *J* = 12.8, 5.6, 3.4, 2.8 Hz, 1H), 1.63 – 1.55 (m, 1H), 1.21 (d, *J* = 6.3 Hz, 3H).

<sup>13</sup>C NMR (126 MHz, CDCl<sub>3</sub>): δ 144.9, 129.4, 126.8, 121.3, 117.1, 114.1, 47.3, 30.3, 26.7, 22.8.

Chiral HPLC method: Chiralcel OD, hexane/IPA = 98/2, 1.0 mL/min, λ = 254 nm; (*R*)-enantiomer *t*<sub>R</sub> (minor) = 6.78 min, (*S*)-enantiomer (*major*) *t*<sub>R</sub> = 7.79 min.

*(R)*-2-phenyl-1,2,3,4-tetrahydroquinoline (**11c**):

NMR and chiral HPLC data consistent with those previously reported.<sup>10</sup>

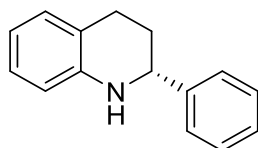

Compound was purified using a 0-3% EtOAc/hexanes eluent and isolated as a white solid 95% yield (39.9 mg) and 59.3% ee.

<sup>1</sup>H NMR (500 MHz, CDCl<sub>3</sub>): δ 7.45 – 7.33 (m, 4H), 7.32 – 7.27 (m, 1H), 7.07 – 6.97 (m, 2H), 6.66 (td, *J* = 7.3, 1.2 Hz, 1H), 6.55 (d, *J* = 7.5 Hz, 1H), 4.45 (dd, *J* = 9.4, 3.3 Hz, 1H), 4.05 (s, 1H), 2.93 (ddd, *J* = 16.2, 10.7, 5.5 Hz, 1H), 2.75 (dt, *J* = 16.3, 4.8 Hz, 1H), 2.13 (dddd, *J* = 13.1, 5.4, 4.5, 3.3 Hz, 1H), 2.00 (dddd, *J* = 13.0, 10.7, 9.3, 5.1 Hz, 1H).

<sup>13</sup>C NMR (126 MHz, CDCl<sub>3</sub>): δ 144.9, 144.9, 129.4, 128.7, 127.6, 127.0, 126.7, 121.0, 117.3, 114.1, 56.4, 31.1, 26.5.

Chiral HPLC method: Chiralcel OD, hexane/IPA = 98/2, 1.0 mL/min, λ = 254 nm; (*S*)-enantiomer *t*<sub>R</sub> (minor) = 15.13 min, (*R*)-enantiomer (*major*) *t*<sub>R</sub> = 21.39 min (*major*).

*(R)*-4-methyl-1,2,3,4-tetrahydroquinoline (**11d**):

NMR and chiral HPLC data consistent with those previously reported<sup>11</sup>

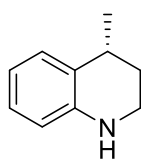



Compound purified using a 0-20% Et<sub>2</sub>O in pentane and isolated a pale-yellow oil in 70% yield and 30% ee.

<sup>1</sup>H NMR (500 MHz, CDCl<sub>3</sub>): δ 7.06 (d, *J* = 7.6 Hz, 1H), 6.96 (tdd, *J* = 7.3, 1.7, 0.8 Hz, 1H), 6.63 (td, *J* = 7.4, 1.2 Hz, 1H), 6.48 (dd, *J* = 7.9, 1.2 Hz, 1H), 3.91 (s, 1H), 3.39 – 3.23 (m, 2H), 2.92 (h, *J* = 6.6 Hz, 1H), 2.04 – 1.94 (m, 1H), 1.68 (dddd, *J* = 13.0, 6.9, 6.1, 3.5 Hz, 1H), 1.29 (d, *J* = 7.0 Hz, 3H).

<sup>13</sup>C NMR (126 MHz, CDCl<sub>3</sub>): δ 144.3, 128.6, 126.9, 126.8, 117.1, 114.3, 39.2, 30.4, 30.0, 22.8.

Chiral HPLC method: Chiralcel OD, hexane/IPA = 98/2, 0.6 mL/min, λ = 254 nm; (*S*)-enantiomer *t*<sub>R</sub> (minor) = 16.41 min, (*R*)-enantiomer *t*<sub>R</sub> (major) = 17.67 min.

*(S)*-2-ethyl-1,2,3,4-tetrahydroquinoline (**11e**):

NMR and chiral HPLC data consistent with those previously reported.<sup>10</sup>

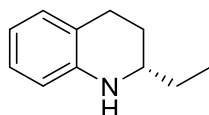

Compound was purified using a 0-2% EtOAc in hexanes and isolated as a pale-yellow oil in 72% yield (23.1 mg) and 75% ee.

<sup>1</sup>H NMR (500 MHz, CDCl<sub>3</sub>): δ 6.96 (ddt, *J* = 8.2, 7.4, 0.8 Hz, 2H), 6.60 (td, *J* = 7.4, 1.2 Hz, 1H), 6.48 (dt, *J* = 7.4, 1.3 Hz, 1H), 3.77 (s, 1H), 3.17 (dtd, *J* = 9.4, 6.4, 2.9 Hz, 1H), 2.88 – 2.77 (m, 1H), 2.73 (ddd, *J* = 16.3, 5.4, 4.0 Hz, 1H), 1.98 (dddd, *J* = 12.7, 5.6, 4.0, 2.9 Hz, 1H), 1.65 – 1.56 (m, 1H), 1.56 – 1.49 (m, 2H), 1.00 (t, *J* = 7.5 Hz, 3H).

<sup>13</sup>C NMR (126 MHz, CDCl<sub>3</sub>): δ 144.9, 129.4, 126.8, 121.5, 117.0, 114.1, 53.2, 29.6, 27.7, 26.6, 10.2.

Chiral HPLC method: Chiralcel OD, hexane/IPA = 98/2, 1.0 mL/min, λ = 254 nm; (*R*)-enantiomer *t*<sub>R</sub> (minor) = 6.56 min, (*S*)-enantiomer *t*<sub>R</sub> (major) = 7.91 min.

*(R)*-2-isopropyl-1,2,3,4-tetrahydroquinoline (**11f**):

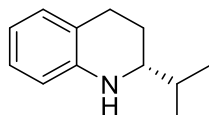

NMR and chiral HPLC data consistent with those previously reported,<sup>10</sup> purified using a 0-2% EtOAc/hexanes eluent; isolated as a pale-yellow oil in 77% yield (27.0 mg) and 66% ee.

<sup>1</sup>H NMR (500 MHz, CDCl<sub>3</sub>): δ 7.00 – 6.91 (m, 2H), 6.59 (td, *J* = 7.3, 1.2 Hz, 1H), 6.52 – 6.45 (m, 1H), 3.76 (s, 1H), 3.04 (ddd, *J* = 10.0, 5.9, 2.9 Hz, 1H), 2.81 (ddd, *J* = 16.5, 11.3, 5.5 Hz, 1H), 2.77 – 2.70 (m, 1H), 1.92 (dddd, *J* = 12.5, 5.5, 3.9, 2.9 Hz, 1H), 1.77 – 1.60 (m, 2H), 1.00 (d, *J* = 6.8 Hz, 3H), 0.98 (d, *J* = 6.8 Hz, 3H).

$^{13}\text{C}$  NMR (126 MHz,  $\text{CDCl}_3$ ):  $\delta$  145.2, 129.3, 126.8, 121.6, 116.9, 114.1, 57.4, 32.7, 26.8, 24.7, 18.7, 18.4.

Chiral HPLC method: Chiralcel OD, hexane/IPA = 98/2, 1.0 mL/min,  $\lambda$  = 254 nm; (*S*)-enantiomer  $t_{\text{R}}$  (minor) = 5.90 min, (*R*)-enantiomer  $t_{\text{R}}$  (major) = 8.53 min.

*(S)*-2-methyl-6-nitro-1,2,3,4-tetrahydroquinoline (**11g**):

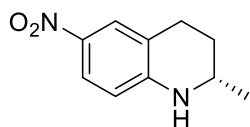

NMR and chiral HPLC data consistent with those previously reported;<sup>12</sup> compound was purified by flash column chromatography on silica gel (silica gel was deactivated with a 1%  $\text{Et}_3\text{N}$  in hexanes solution) using a 0-15% EtOAc/hexanes eluent gradient; isolated an orange solid in 83% yield (44.2 mg) and 86% ee. The compound was recrystallized from DCM/hexanes to afford the tetrahydroquinoline in 96% ee.

$^1\text{H}$  NMR (500 MHz,  $\text{CDCl}_3$ ):  $\delta$  7.95 – 7.86 (m, 2H), 6.42 – 6.32 (m, 1H), 4.53 (s, 1H), 3.55 (dq,  $J$  = 9.7, 6.4, 3.4 Hz, 1H), 2.90 – 2.74 (m, 2H), 2.00 (dtd,  $J$  = 12.9, 4.8, 3.4 Hz, 1H), 1.58 (dtd,  $J$  = 13.0, 9.8, 6.2 Hz, 1H), 1.28 (d,  $J$  = 6.4 Hz, 3H).

$^{13}\text{C}$  NMR (126 MHz,  $\text{CDCl}_3$ ):  $\delta$  150.4, 137.5, 125.9, 124.4, 119.8, 112.2, 47.6, 29.0, 26.3, 22.4.

Chiral HPLC method: Chiralcel OD, hexane/IPA = 95/5, 1 mL/min,  $\lambda$  = 254 nm; (*R*)-enantiomer  $t_{\text{R}}$  (minor) = 19.35 min, (*S*)-enantiomer  $t_{\text{R}}$  (major) = 20.67 min (major).

*(R)*-3-methyl-1,2,3,4-tetrahydroquinoline (**11h**):

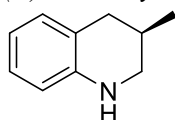

NMR and chiral HPLC data consistent with those previously reported.<sup>13</sup>

Compound was purified by flash column chromatography on silica gel using a 0-10% pentane/ $\text{Et}_2\text{O}$  eluent; isolated as a pale-yellow oil in 71% yield (20.9 mg) and 14% ee.

$^1\text{H}$  NMR (400 MHz,  $\text{CDCl}_3$ ):  $\delta$  7.01-6.91 (m, 2H), 6.61 (td,  $J$  = 7.4, 1.2 Hz, 1H), 6.49 (dd,  $J$  = 7.9, 1.2 Hz, 1H), 3.89 (s, 1H), 3.27 (ddd,  $J$  = 11.0, 3.7, 2.0 Hz, 1H), 2.90 (dd,  $J$  = 11.0, 9.6 Hz, 1H), 2.78 (ddd,  $J$  = 16.0, 5.0, 2.0 Hz, 1H), 2.43 (dd,  $J$  = 16.0, 10.2 Hz, 1H), 2.14 – 1.99 (m, 1H), 1.05 (d,  $J$  = 6.6 Hz, 3H).

$^{13}\text{C}$  NMR (126 MHz,  $\text{CDCl}_3$ )  $\delta$  144.4, 129.7, 126.8, 121.3, 117.1, 114.0, 49.0, 35.6, 27.3, 19.2.

Chiral HPLC method: Chiralcel OJ-H, hexane/IPA = 90/10, 0.5 mL/min,  $\lambda$  = 210 nm; (*R*)-enantiomer  $t_{\text{R}}$  = 30.77 min (major), (*S*)-enantiomer  $t_{\text{R}}$  = 37.77 min (minor).

*(R)*-3-phenyl-1,2,3,4-tetrahydroquinoline (**11i**):

The precursor 3-phenylquinoline was synthesized according to literature procedure.<sup>14</sup>

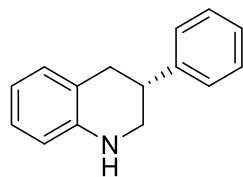

NMR and chiral HPLC data consistent with those previously reported.<sup>15</sup> Compound was purified by flash column chromatography on silica gel using 0-6% EtOAc/hexanes as the eluent; isolated as a pale-yellow solid in 51% yield (10.5 mg; yield based on recovered starting material) and 4% ee.

<sup>1</sup>H NMR (400 MHz, CDCl<sub>3</sub>) δ 7.39 – 7.30 (m, 2H), 7.30 – 7.22 (m, 3H), 7.02 (d, *J* = 7.4 Hz, 2H), 6.66 (td, *J* = 7.4, 1.2 Hz, 1H), 6.57 (dd, *J* = 8.4, 1.3 Hz, 1H), 4.15 (s, 1H), 3.47 (ddd, *J* = 11.2, 3.7, 1.9 Hz, 1H), 3.35 (t, *J* = 10.7 Hz, 1H), 3.16 (tdd, *J* = 10.2, 5.8, 3.7 Hz, 1H), 3.09 – 2.93 (m, 2H).

<sup>13</sup>C NMR (101 MHz, CDCl<sub>3</sub>) δ 144.1, 144.0, 129.7, 128.8, 127.4, 127.1, 126.8, 121.6, 117.3, 114.3, 48.5, 38.8, 34.8.

Chiral HPLC method: Chiralcel OD, hexane/IPA = 98/2, 1 mL/min, λ = 254 nm; (*R*)-enantiomer *t*<sub>R</sub> = 18.81 min (major), (*S*)- 10.5 mg *t*<sub>R</sub> = 24.04 min (minor).

*Methyl (R)*-1,2,3,4-tetrahydroquinoline-2-carboxylate (**11j**)

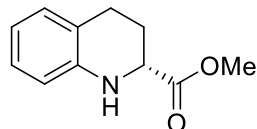

Reaction time: 4 h at 50 °C using catalyst **5c**. NMR and chiral HPLC data consistent with those previously reported.<sup>16</sup>

purified using a 0-8% Et<sub>2</sub>O/hexanes eluent; isolated as a colourless oil in 71% yield (27.2 mg) and 30% ee.

<sup>1</sup>H NMR (400 MHz, CDCl<sub>3</sub>) δ 7.05 – 6.96 (m, 1H), 6.96 (d, *J* = 7.5 Hz, 1H), 6.65 (td, *J* = 7.3, 1.2 Hz, 1H), 6.59 (dd, *J* = 8.0, 1.2 Hz, 1H), 4.40 (s, 1H), 4.05 (dd, *J* = 8.8, 3.8 Hz, 1H), 3.78 (s, 3H), 2.90 – 2.71 (m, 2H), 2.29 (dtd, *J* = 13.0, 5.6, 3.8 Hz, 1H), 2.01 (dtd, *J* = 13.0, 9.1, 5.3 Hz, 1H).

<sup>13</sup>C NMR (101 MHz, CDCl<sub>3</sub>) δ 173.8, 143.1, 129.3, 127.2, 120.7, 117.8, 114.7, 54.1, 52.5, 26.0, 24.8.

Chiral HPLC method: Chiralpak AD, hexane/IPA = 80/20, 1 mL/min, λ = 254 nm; (*R*)-*t*<sub>R</sub> = 7.62 min (major), (*S*)-*t*<sub>R</sub> = 9.04 min (minor).

**Table 1: Solvent Screening and Optimization of Reaction Conditions**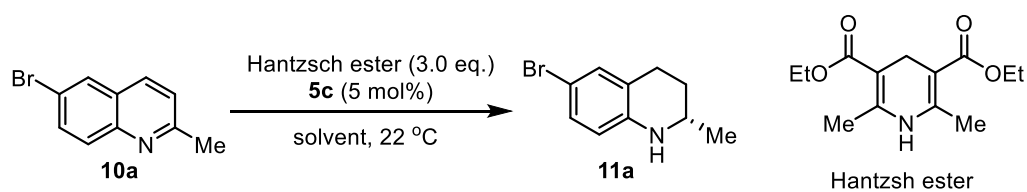

| Entry | Solvent                         | Time (h) | Yield (%) | ee (%) |
|-------|---------------------------------|----------|-----------|--------|
| 1     | toluene                         | 2        | 99        | 80     |
| 2     | CH <sub>2</sub> Cl <sub>2</sub> | 1.5      | 99        | 75     |
| 3     | CHCl <sub>3</sub>               | 0.5      | 99        | 80     |
| 4     | CCl <sub>4</sub>                | 1.5      | 99        | 86     |
| 5     | DCE                             | 1.5      | 99        | 78     |
| 6     | cyclohexane                     | 5        | 99        | 89     |
| 7     | <i>n</i> -hexane                | 5        | 99        | 86     |
| 8     | Et <sub>2</sub> O               | 3        | 99        | 85     |
| 9     | <i>t</i> -BuOMe                 | 3        | 99        | 85     |
| 10    | EtOAc                           | 2        | 99        | 84     |

**Table 2: Optimization of Hantzsh Ester**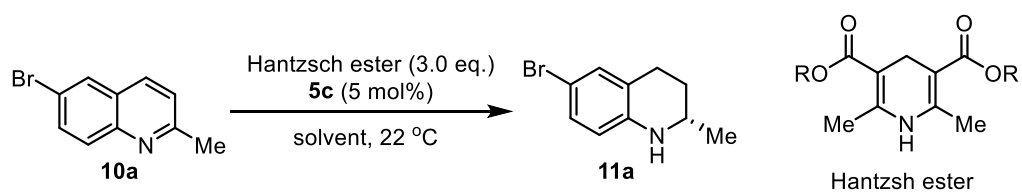

| Entry | R            | Time (h) | Yield (%) | ee (%) |
|-------|--------------|----------|-----------|--------|
| 1     | Me           | 5        | 99        | 88     |
| 2     | Et           | 5        | 99        | 89     |
| 3     | <i>t</i> -Bu | 3        | 99        | 85     |

# $^1\text{H}$ , $^{13}\text{C}$ , $^{31}\text{P}$ NMR spectra and chiral HPLC chromatograms

## Compounds Listed in Numerical Order

### $^1\text{H}$ NMR of **3b**

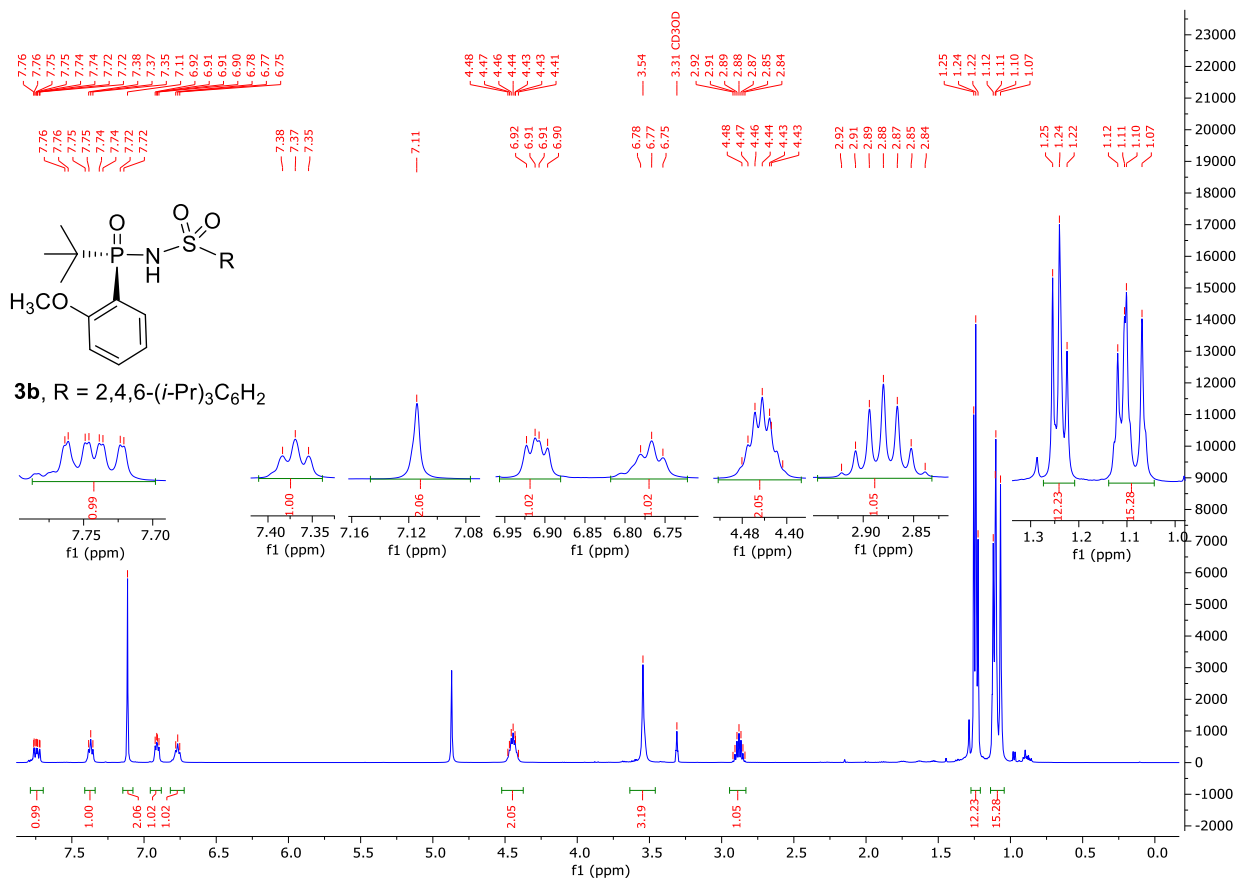

### $^{31}\text{P}$ NMR of **3b**

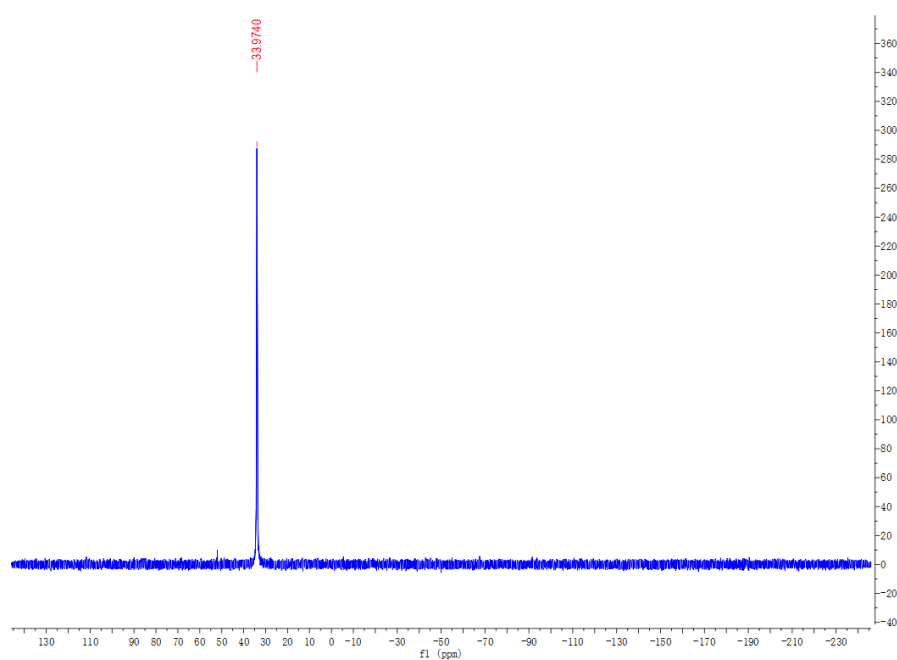

# <sup>13</sup>C NMR of **3b**

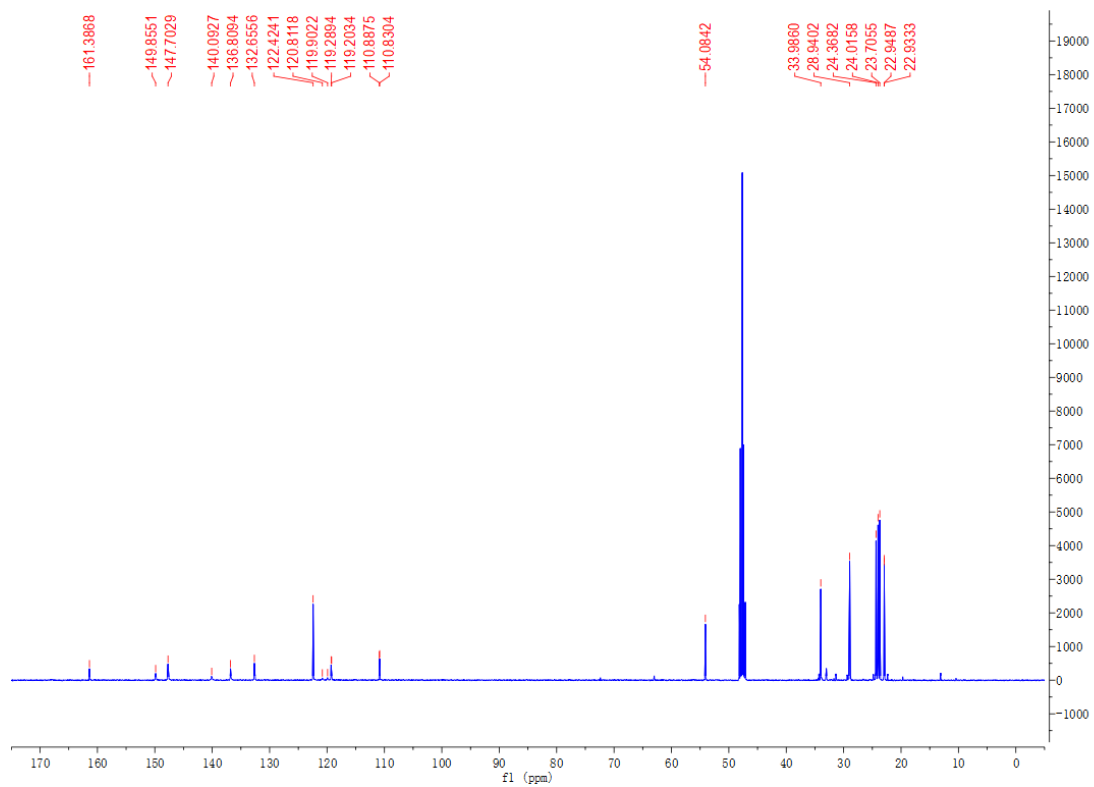

### <sup>1</sup>H NMR of 4a

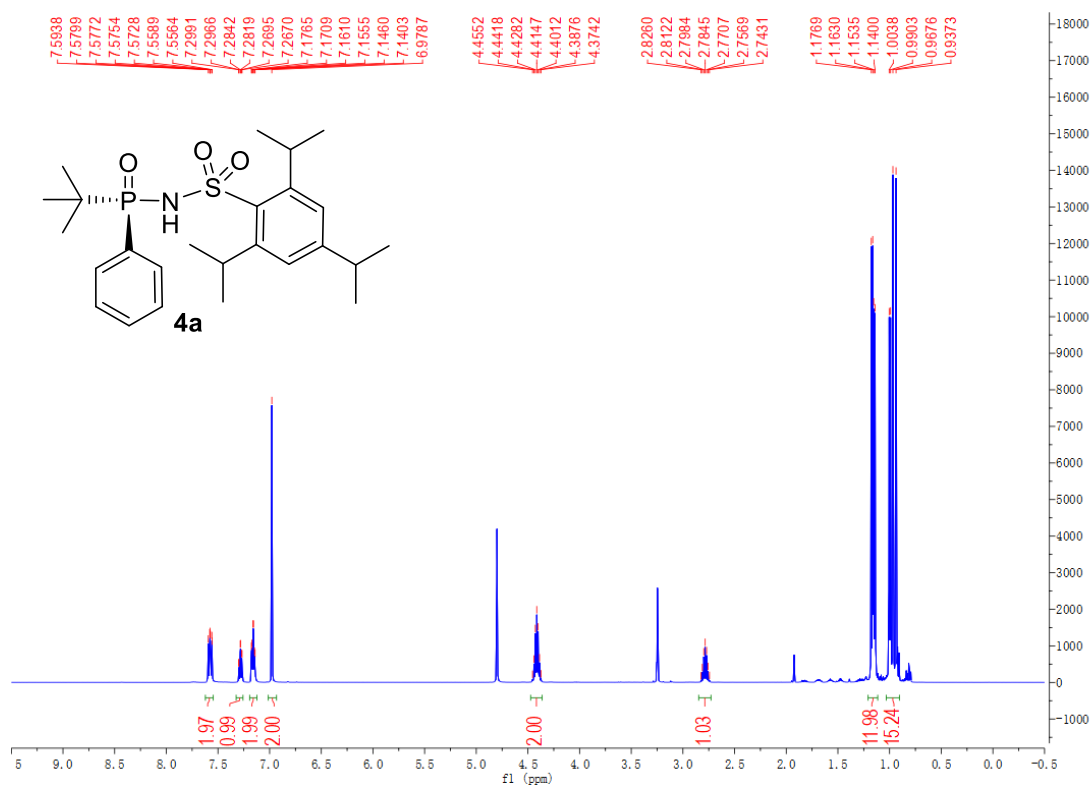

### <sup>31</sup>P NMR of 4a

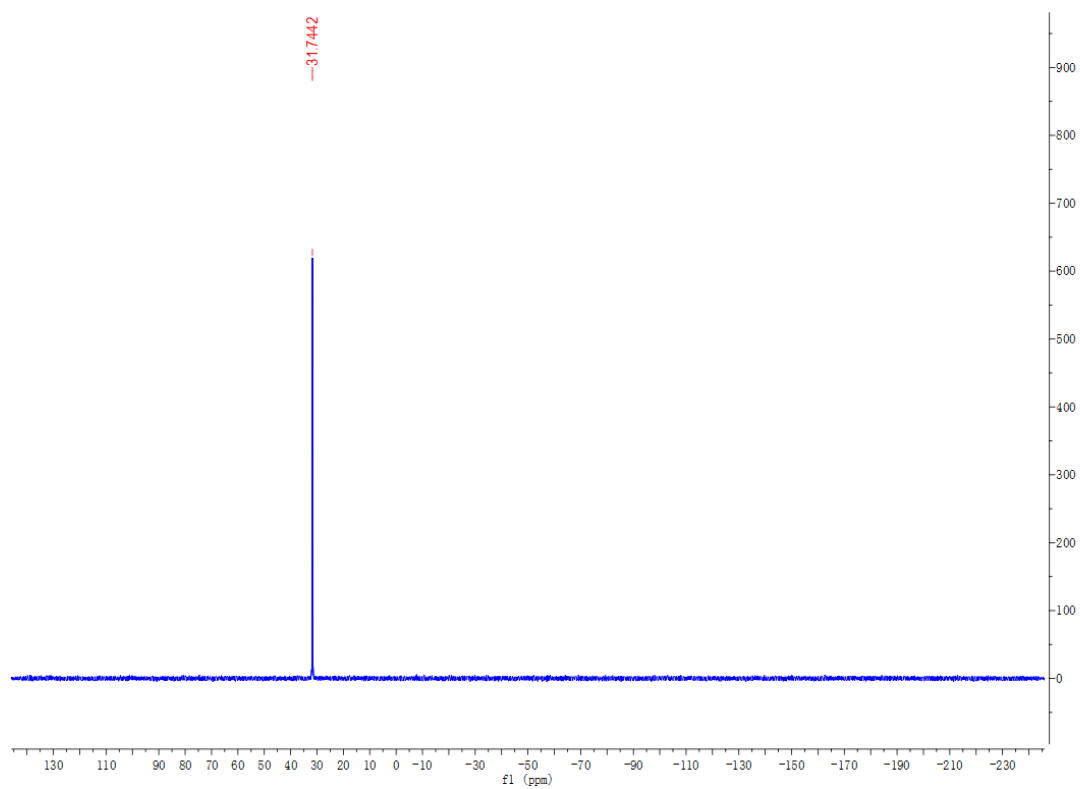

# <sup>13</sup>C NMR of 4a

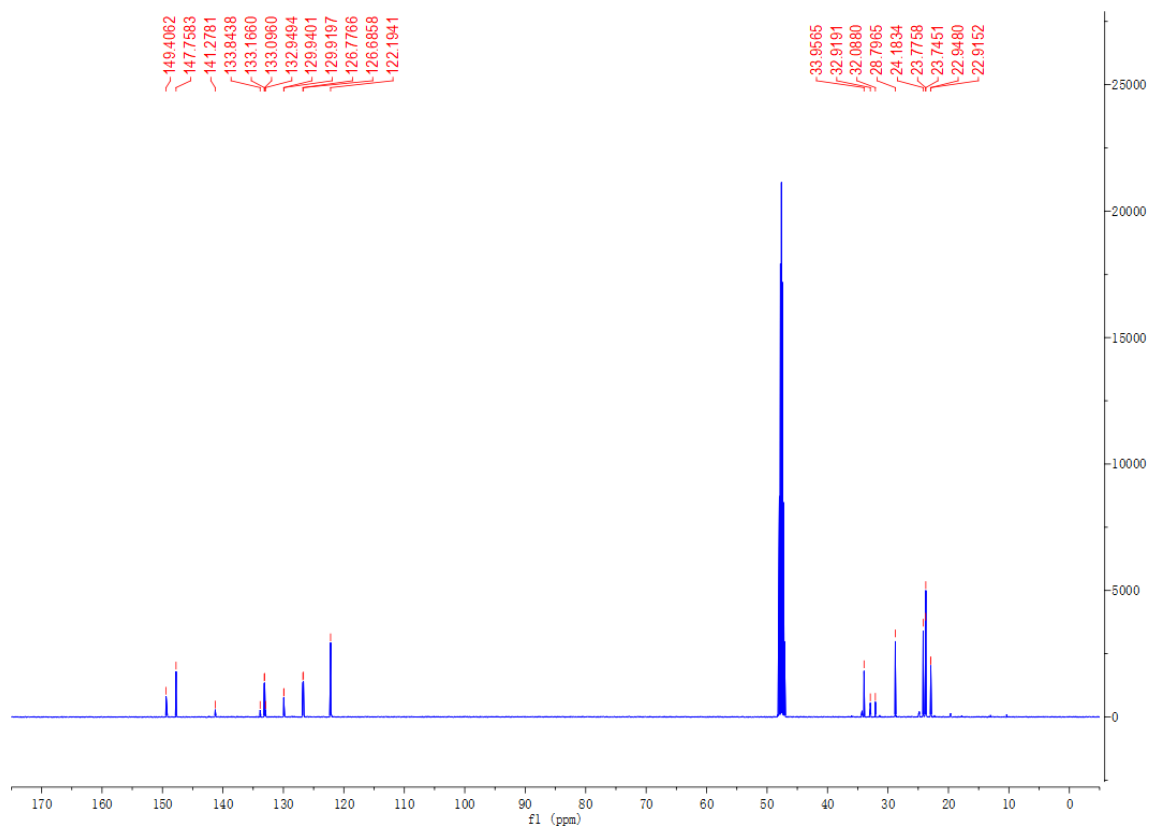



## Chiral HPLC Chromatograms of **4a**

Method: HPLC instrument: Agilent 1260 HPLC;  $\lambda = 220$  nm

Column: Phenomenex Lux Cellulose-2, 4.6x100 mm

Solvent A: 0.1% (v/v) HClO<sub>4</sub> in water, Solvent B: CH<sub>3</sub>CN; 50-90% solvent B in 15 min  
at a flow rate of 1.2 mL/min

Top panel, racemic (in red) superimposed with (*R*)-enantiomer (in blue); bottom panel  
(*R*)-**4a**; (*R*)-enantiomer  $t_R = 11.44$  min (major), (*S*)- enantiomer  $t_R = 12.36$  min (minor).

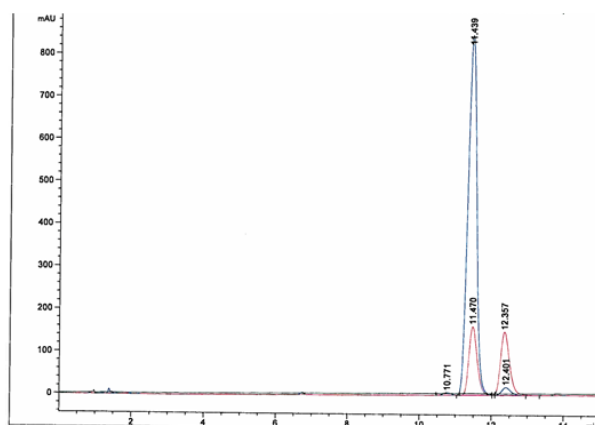

| Peak #   | RetTime [min] | Type | Width [min] | Area [mAU*s] | Height [mAU] | Area %  |
|----------|---------------|------|-------------|--------------|--------------|---------|
| 1        | 11.439        | MM   | 0.2819      | 1.42850e4    | 844.44775    | 98.0089 |
| 2        | 12.401        | BB   | 0.2276      | 290.20435    | 17.39890     | 1.9911  |
| Totals : |               |      |             | 1.45752e4    | 861.84665    |         |

\*\*\* End of Report \*\*\*

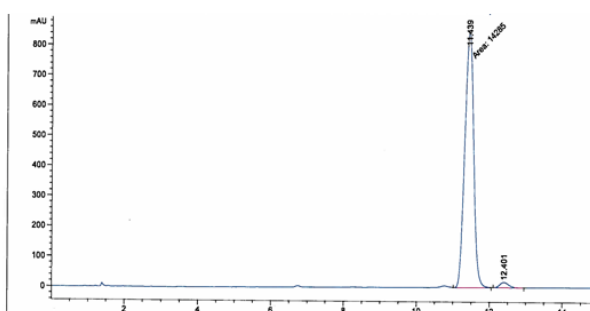

# <sup>1</sup>H NMR of 4c

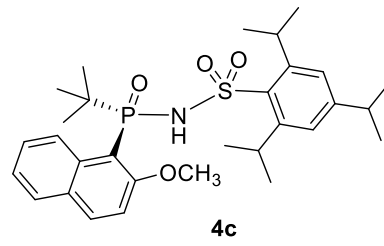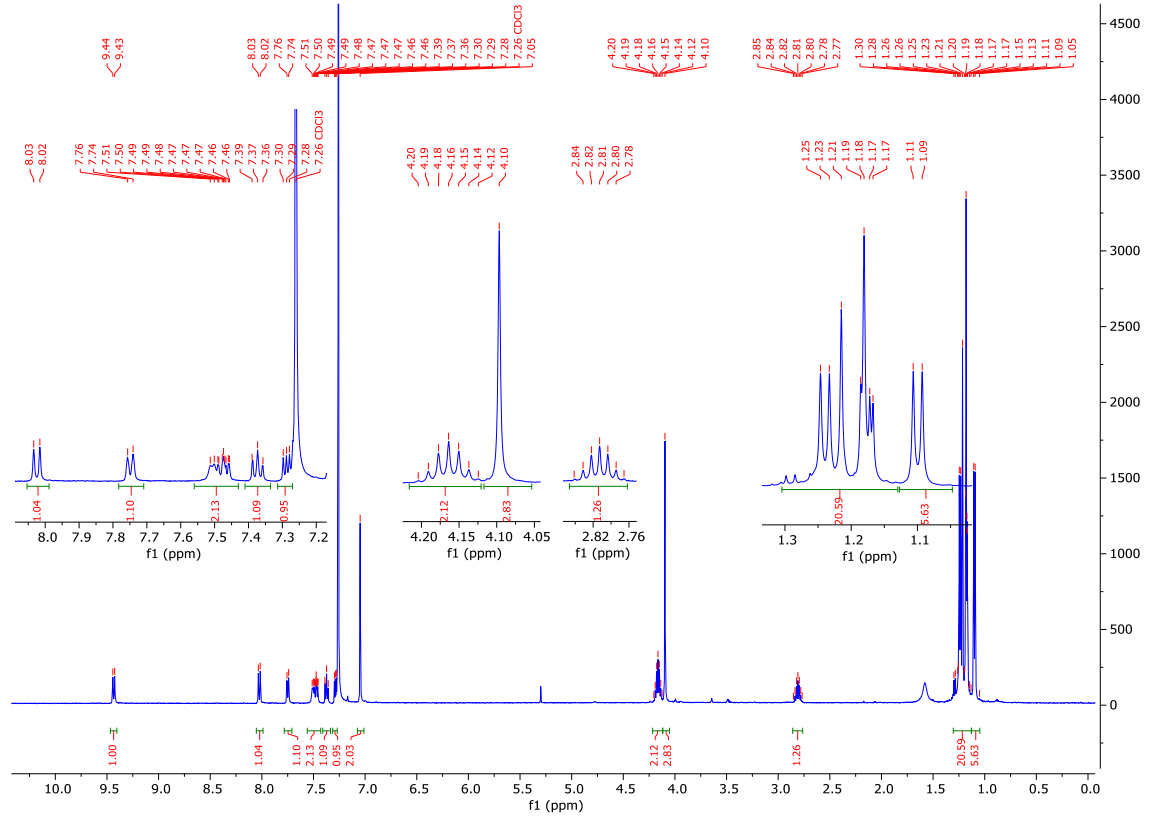

# <sup>31</sup>P NMR of 4c

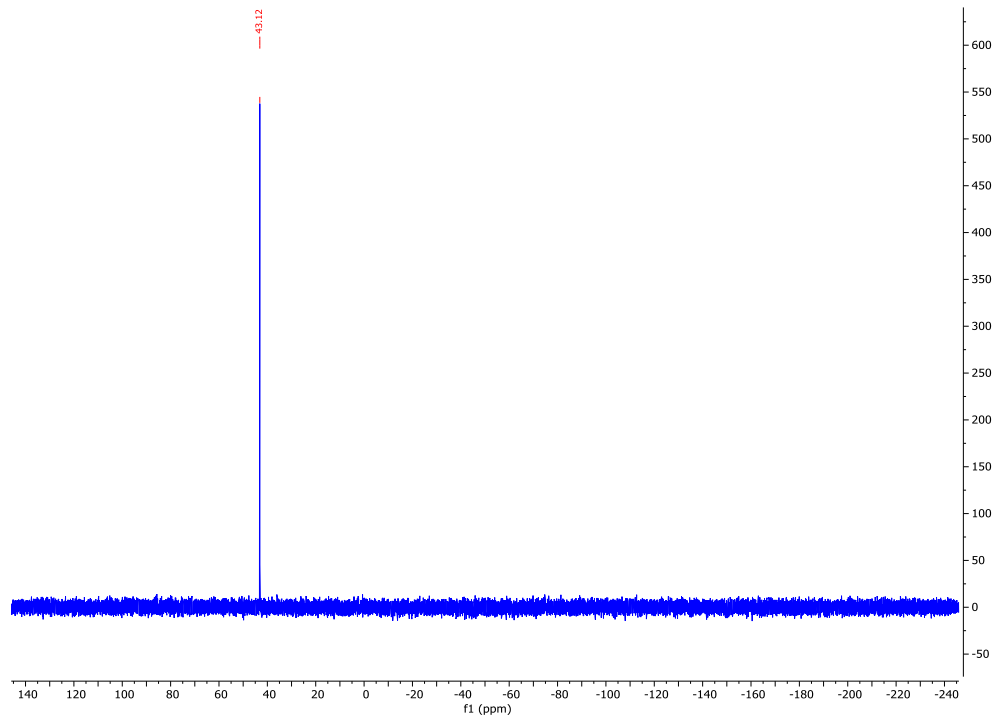

# $^{13}\text{C}$ NMR of 4c

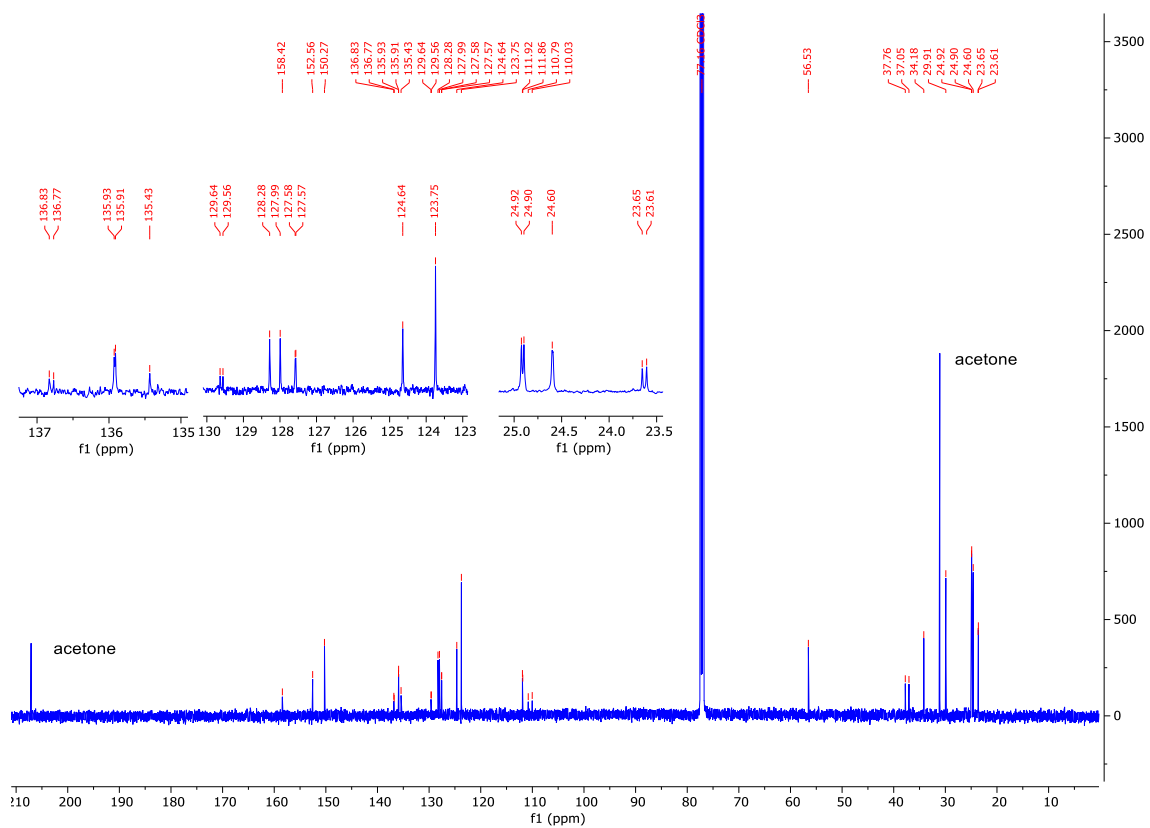



# <sup>1</sup>H NMR of 4e

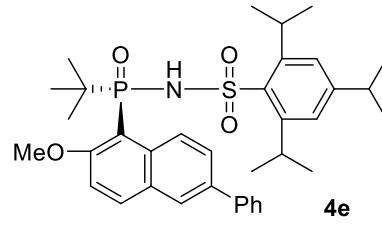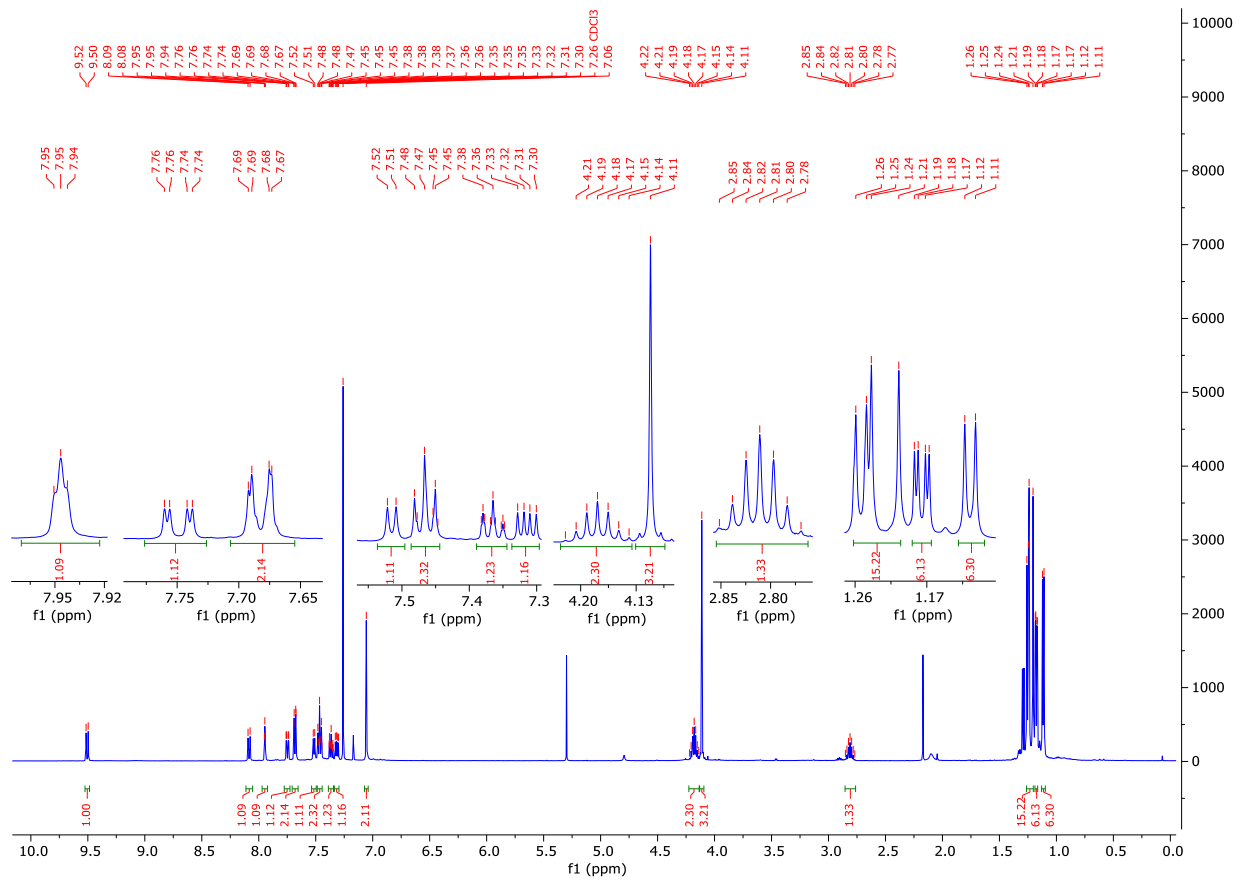

# <sup>31</sup>P NMR of 4e

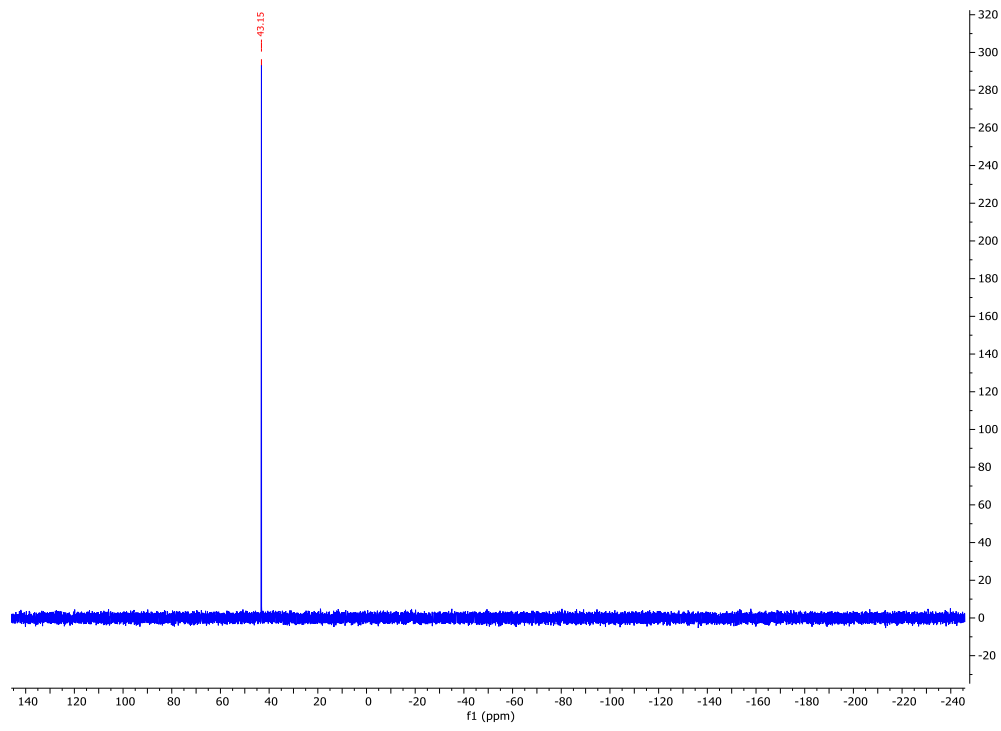

### <sup>1</sup>H NMR of **5a**

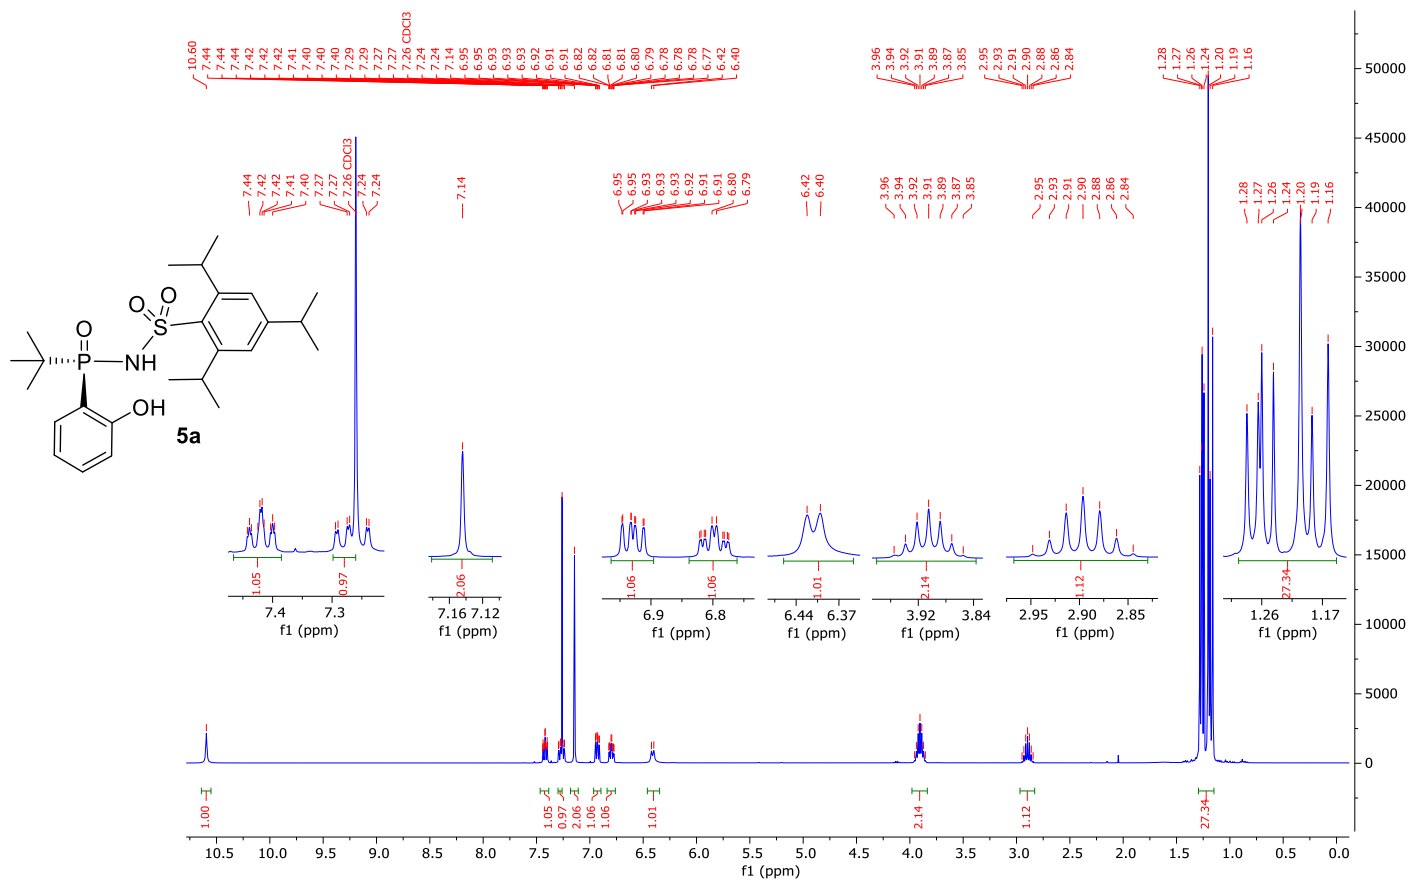

### <sup>31</sup>P NMR of **5a**

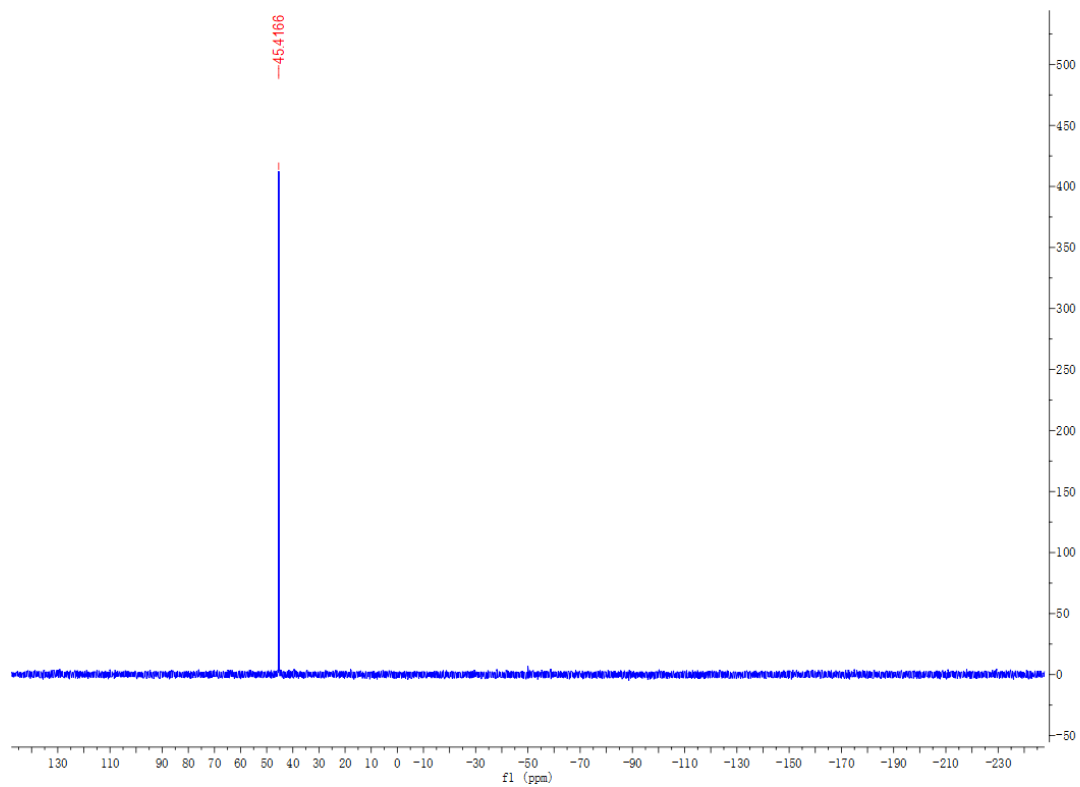

# <sup>13</sup>C NMR of 5a

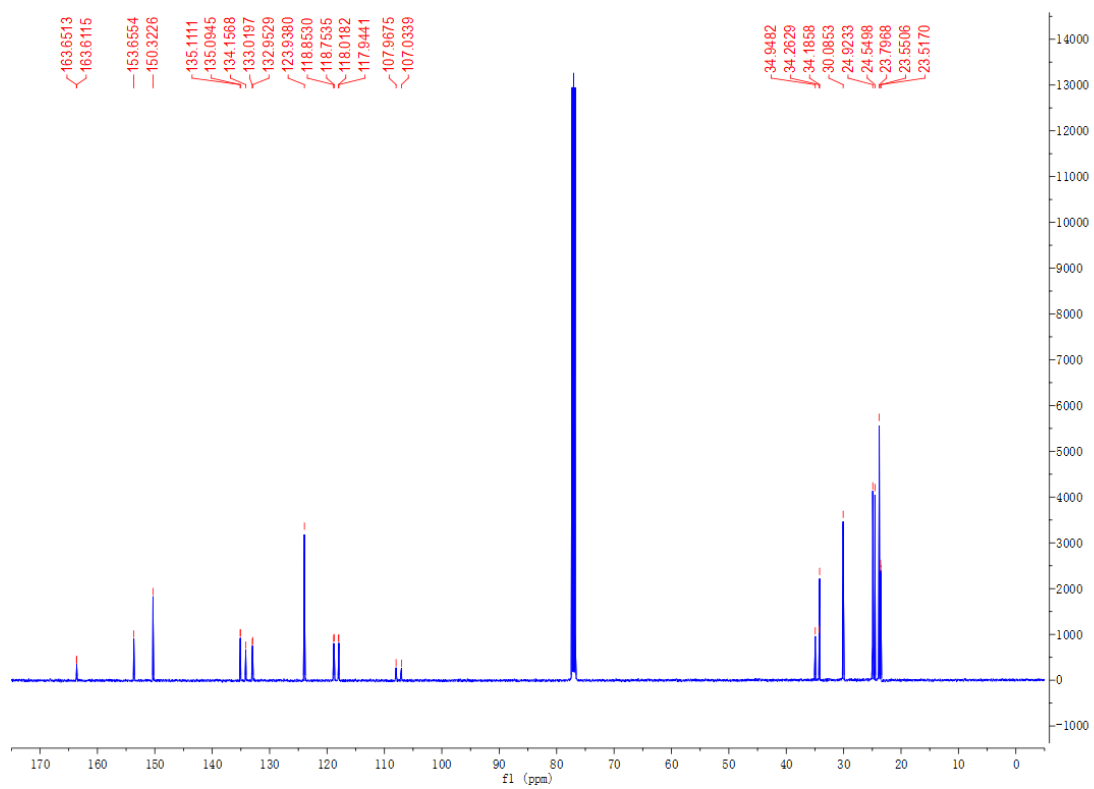

### $^1\text{H}$ NMR of **5b**

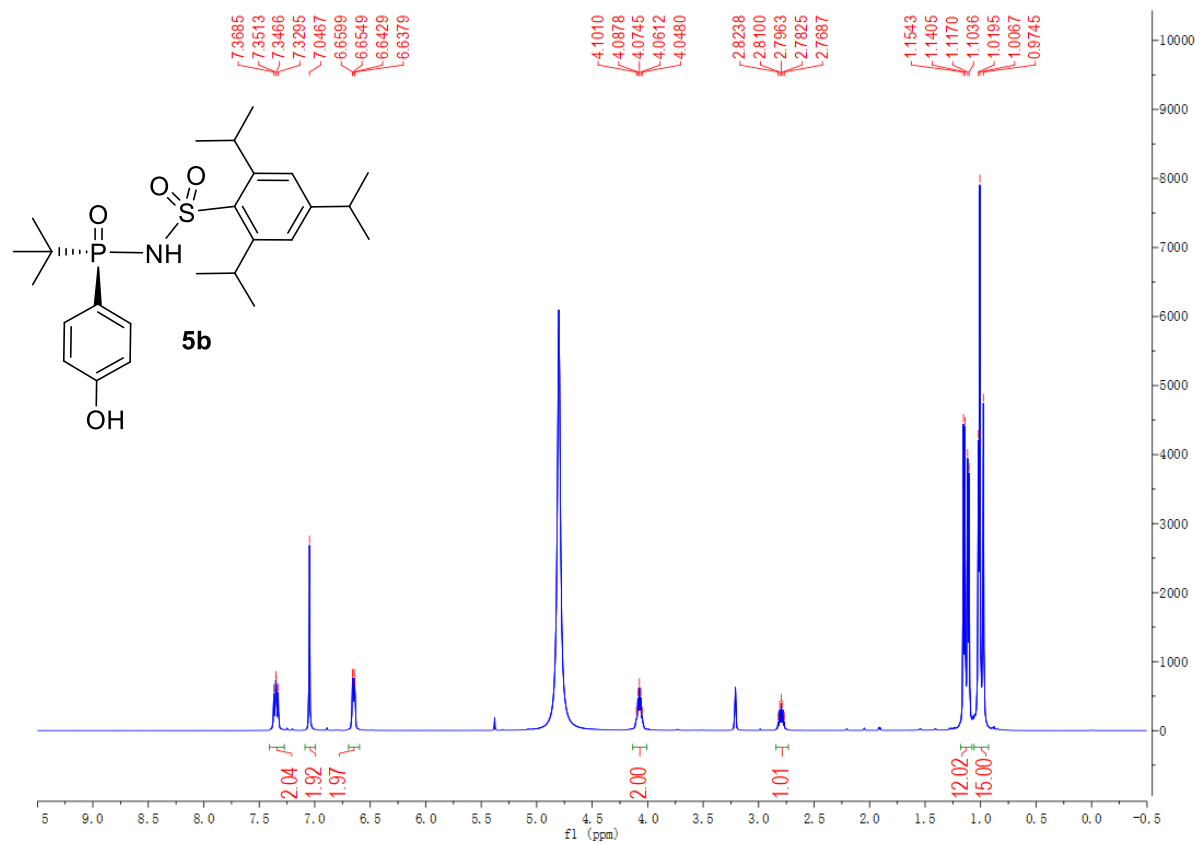

### $^{31}\text{P}$ NMR of **5b**

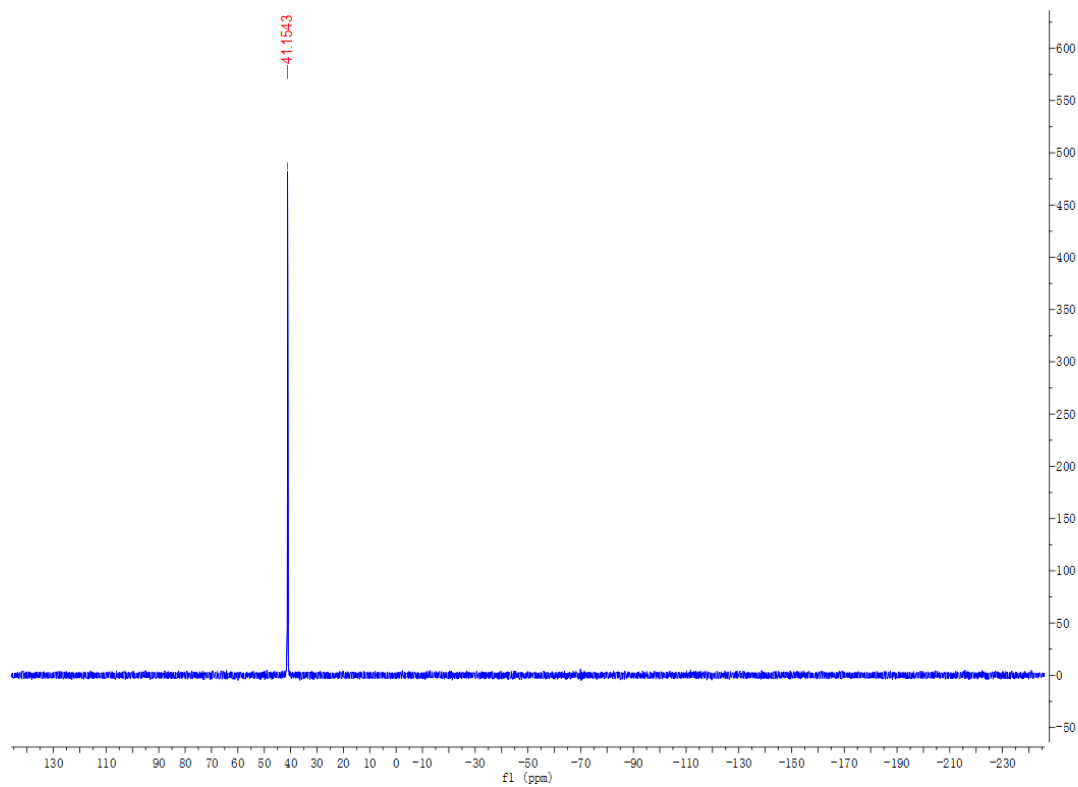



# $^{13}\text{C}$ NMR of **5b**

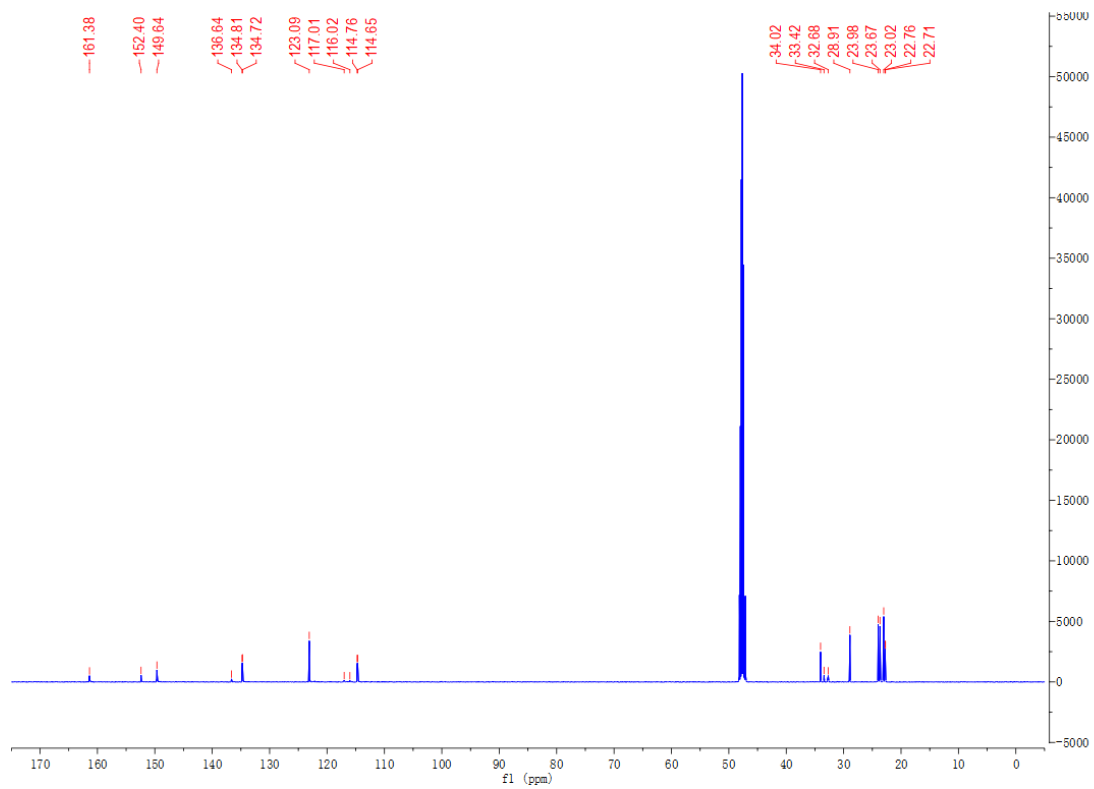

### $^1\text{H}$ NMR of **5c**

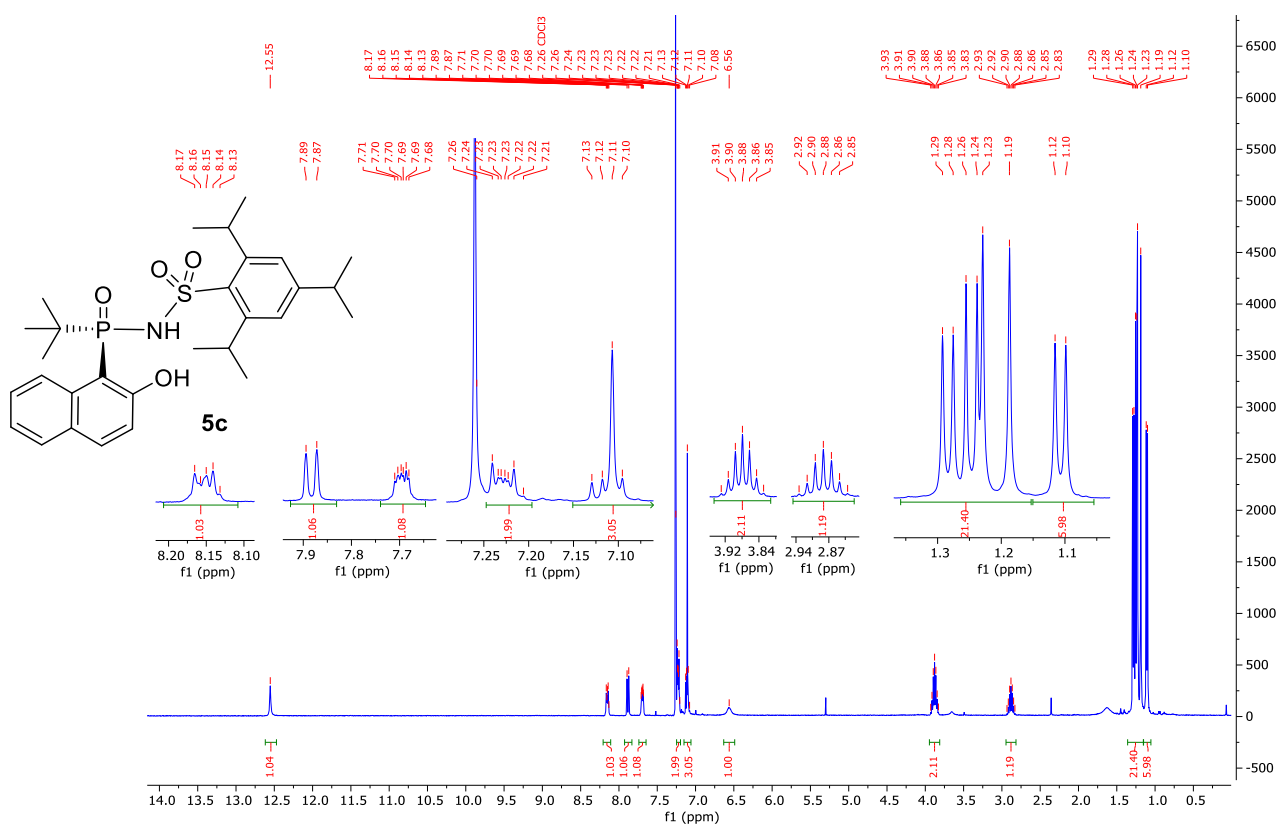

# $^{13}\text{C}$ NMR of 5c

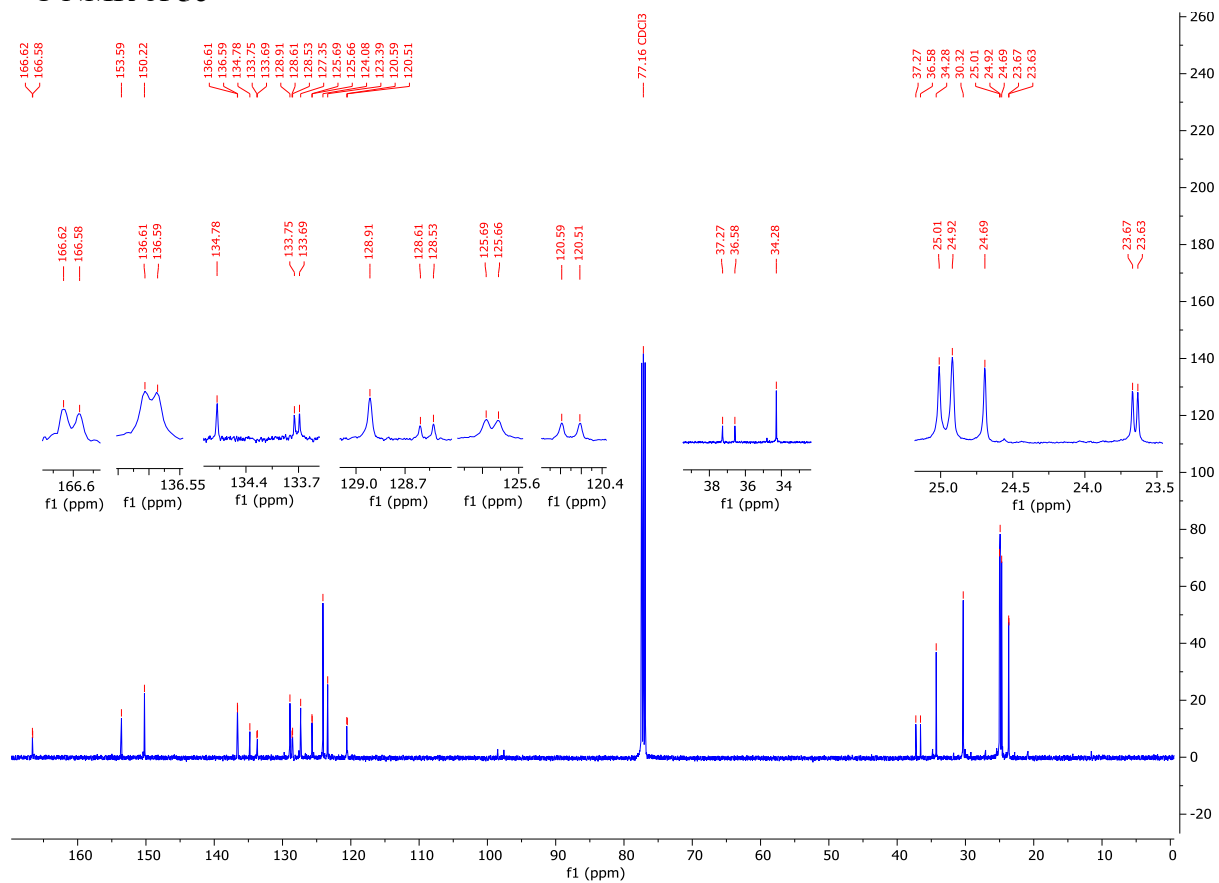



# <sup>13</sup>C NMR of 5d

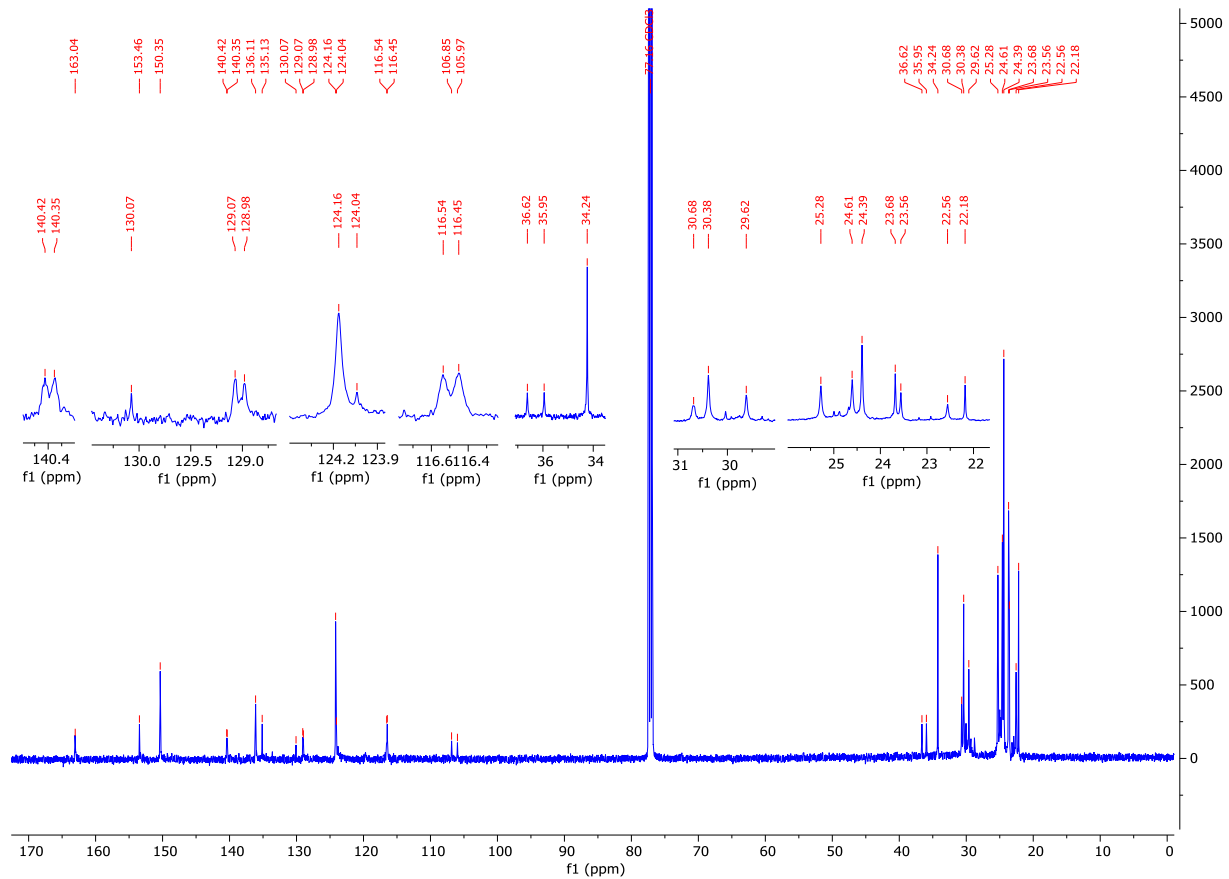

# <sup>1</sup>H NMR of 5e

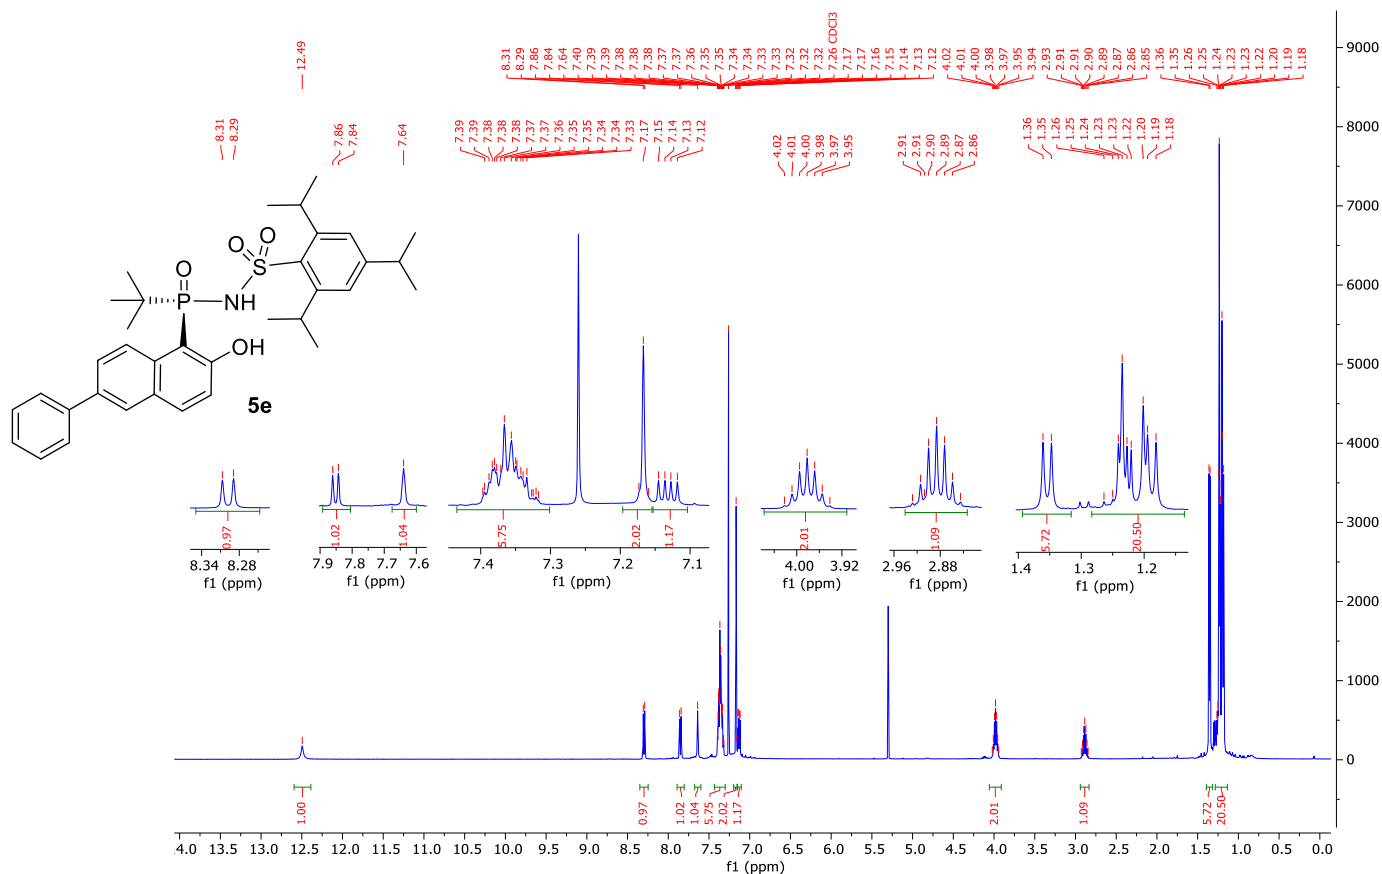

# <sup>31</sup>P NMR of 5e

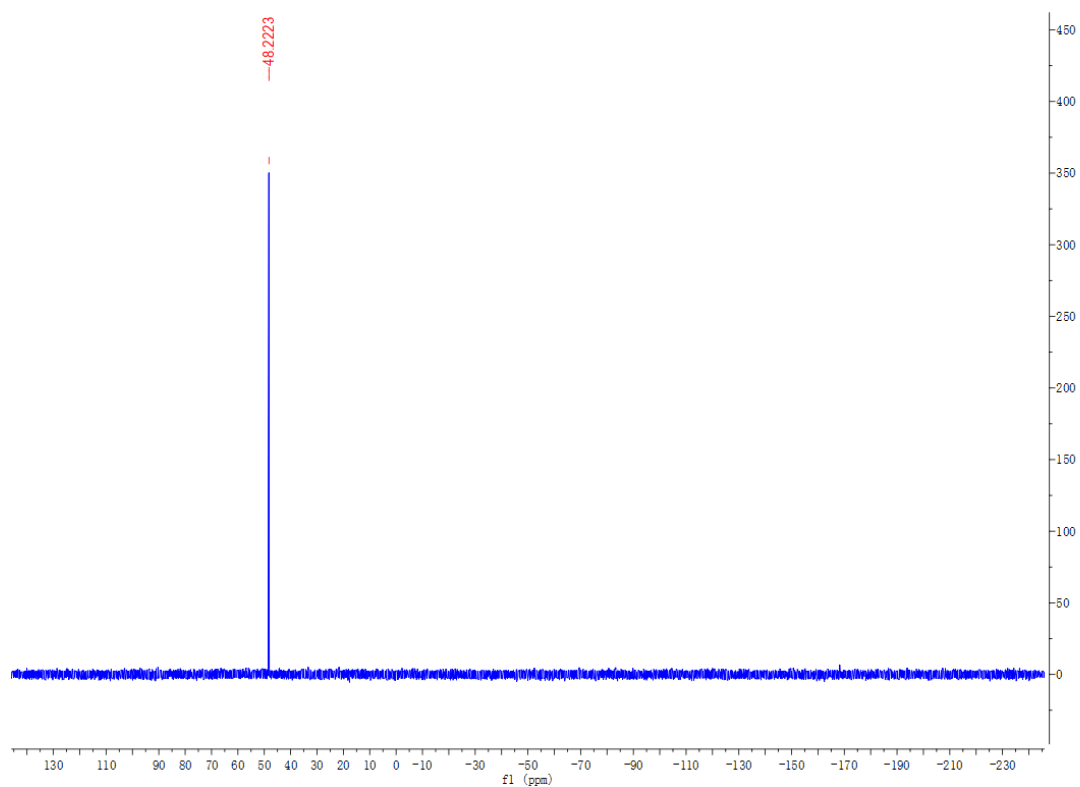

# <sup>13</sup>C NMR of 5e

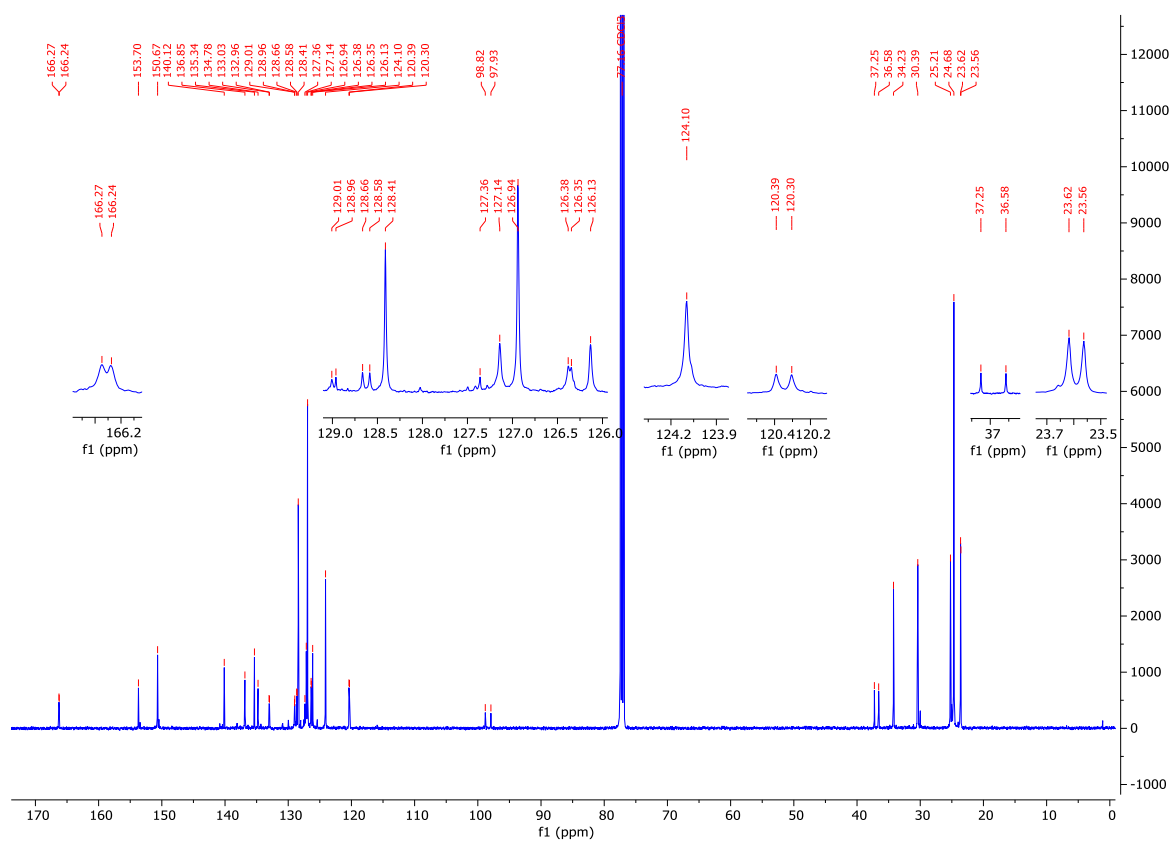

### <sup>1</sup>H-NMR of 7e

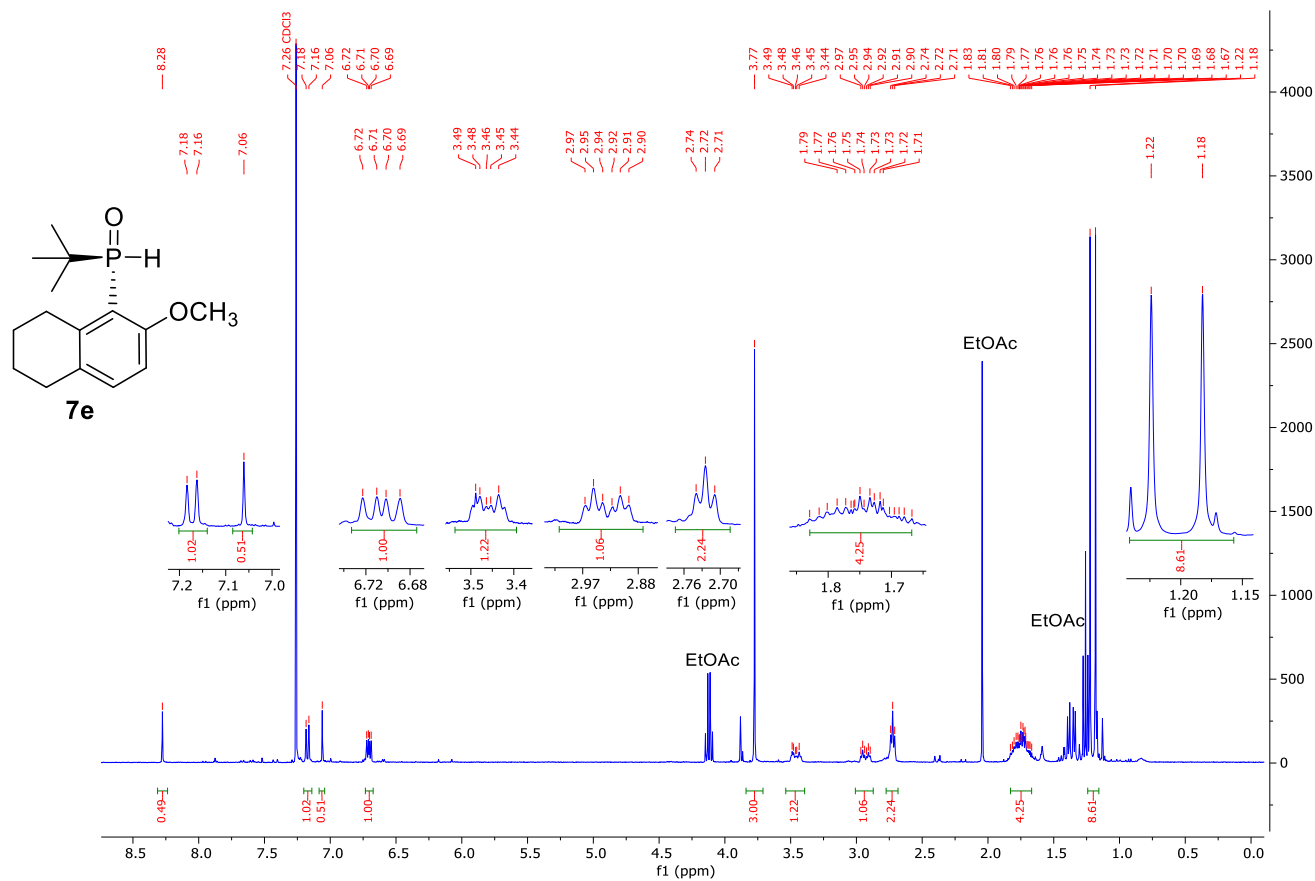

### <sup>31</sup>P-NMR of 7e

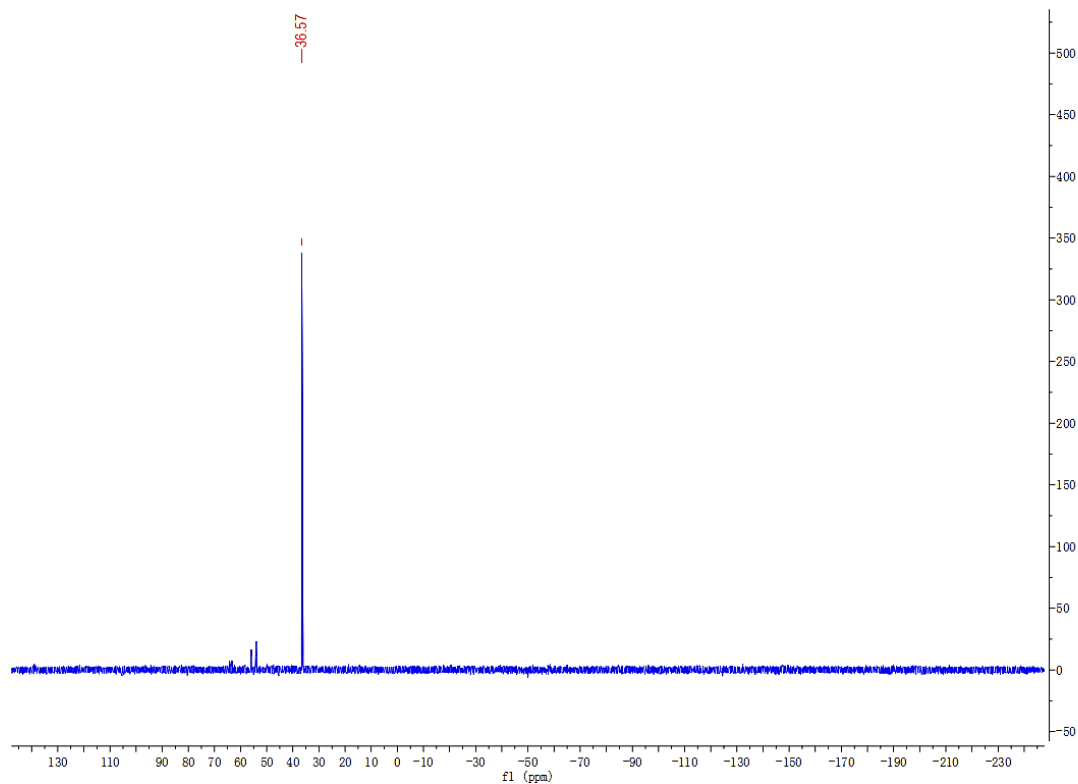



### $^1\text{H-NMR}$ of **7f**

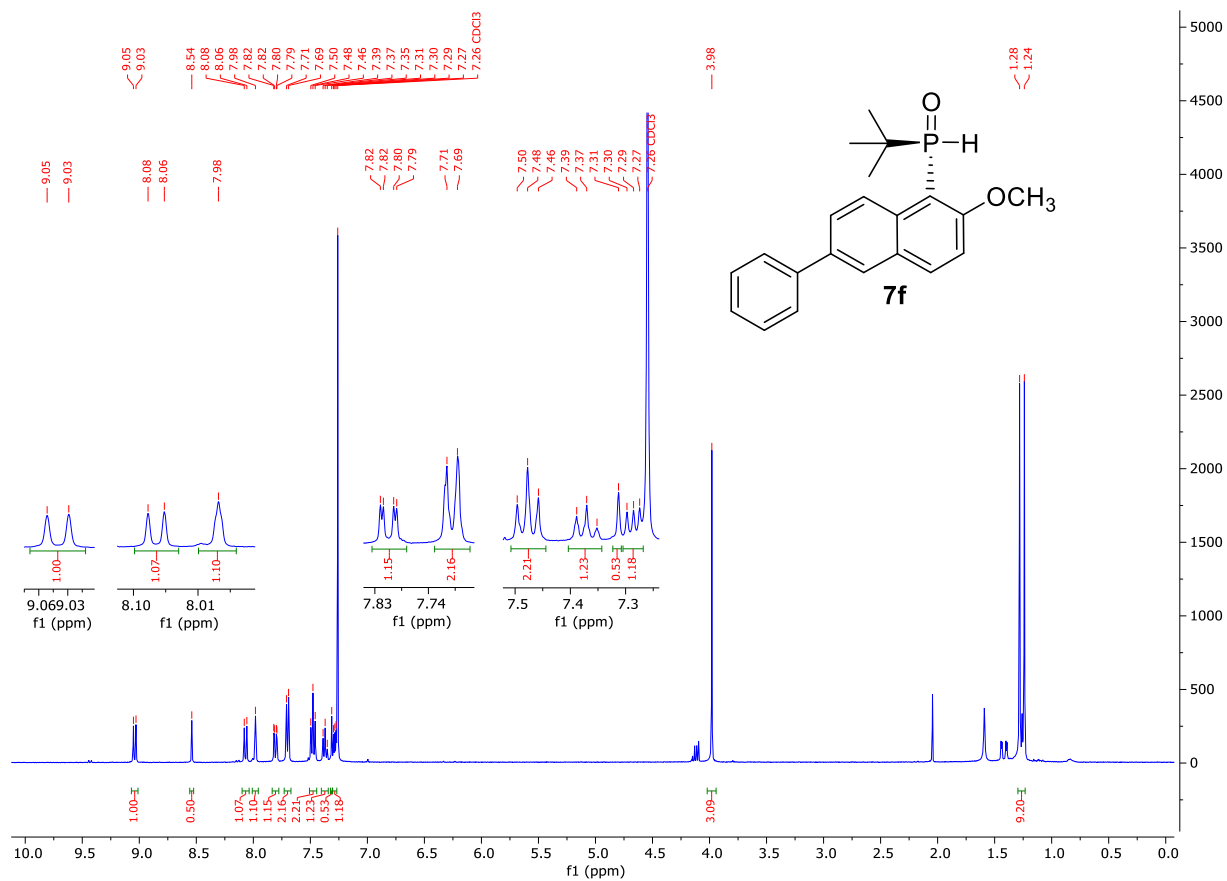

### $^{31}\text{P-NMR}$ of **7f**

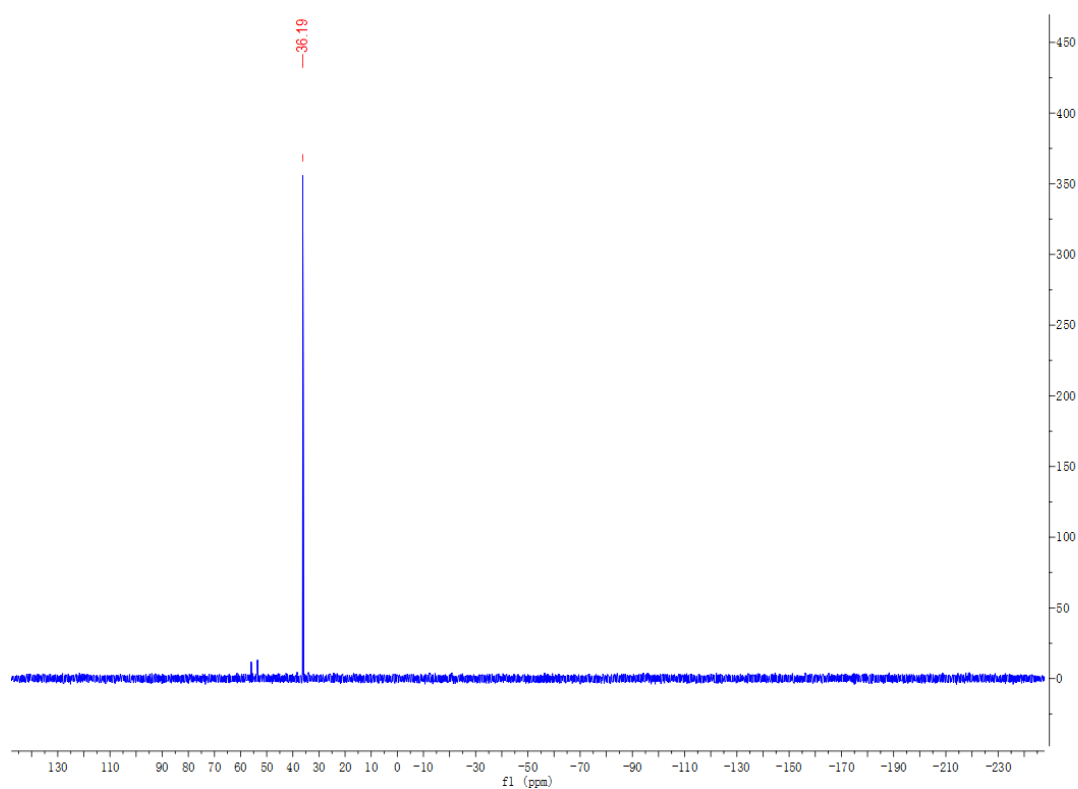

$^1\text{H-NMR}$ ,  $^{13}\text{C}$  and  $^{31}\text{P}$  NMR spectra of compound **8a** were consistent with those previously reported.<sup>7</sup>

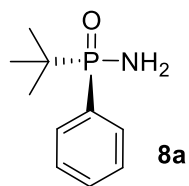

### Chiral HPLC chromatograms of **8a**

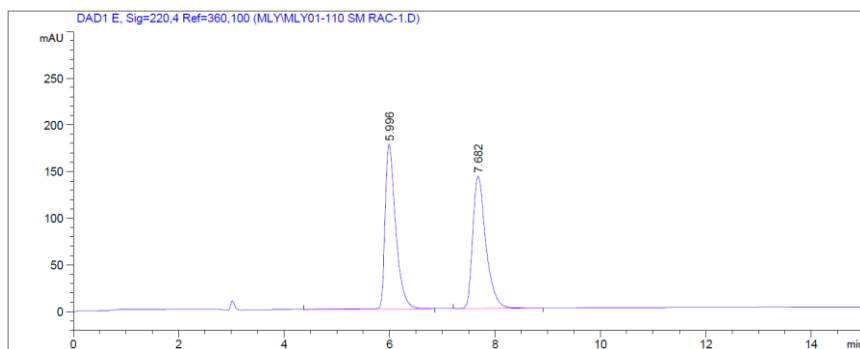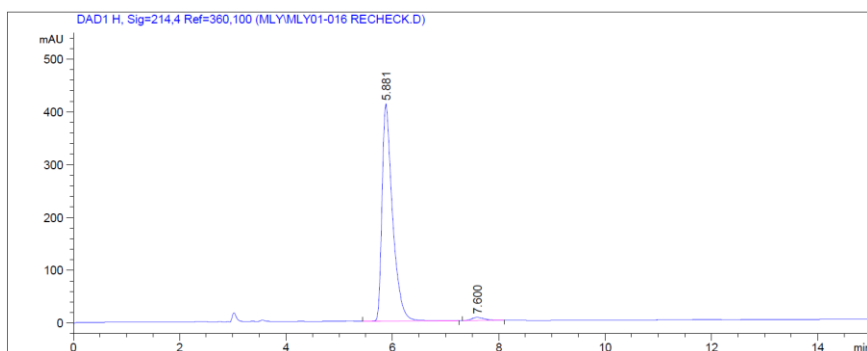

| Peak # | RetTime [min] | Type | Width [min] | Area [mAU*s] | Height [mAU] | Area %  |
|--------|---------------|------|-------------|--------------|--------------|---------|
| 1      | 5.881         | BB   | 0.2069      | 5673.06494   | 411.40399    | 98.3002 |
| 2      | 7.600         | BB   | 0.2540      | 98.09958     | 5.90015      | 1.6998  |

# <sup>1</sup>H NMR of **8b**

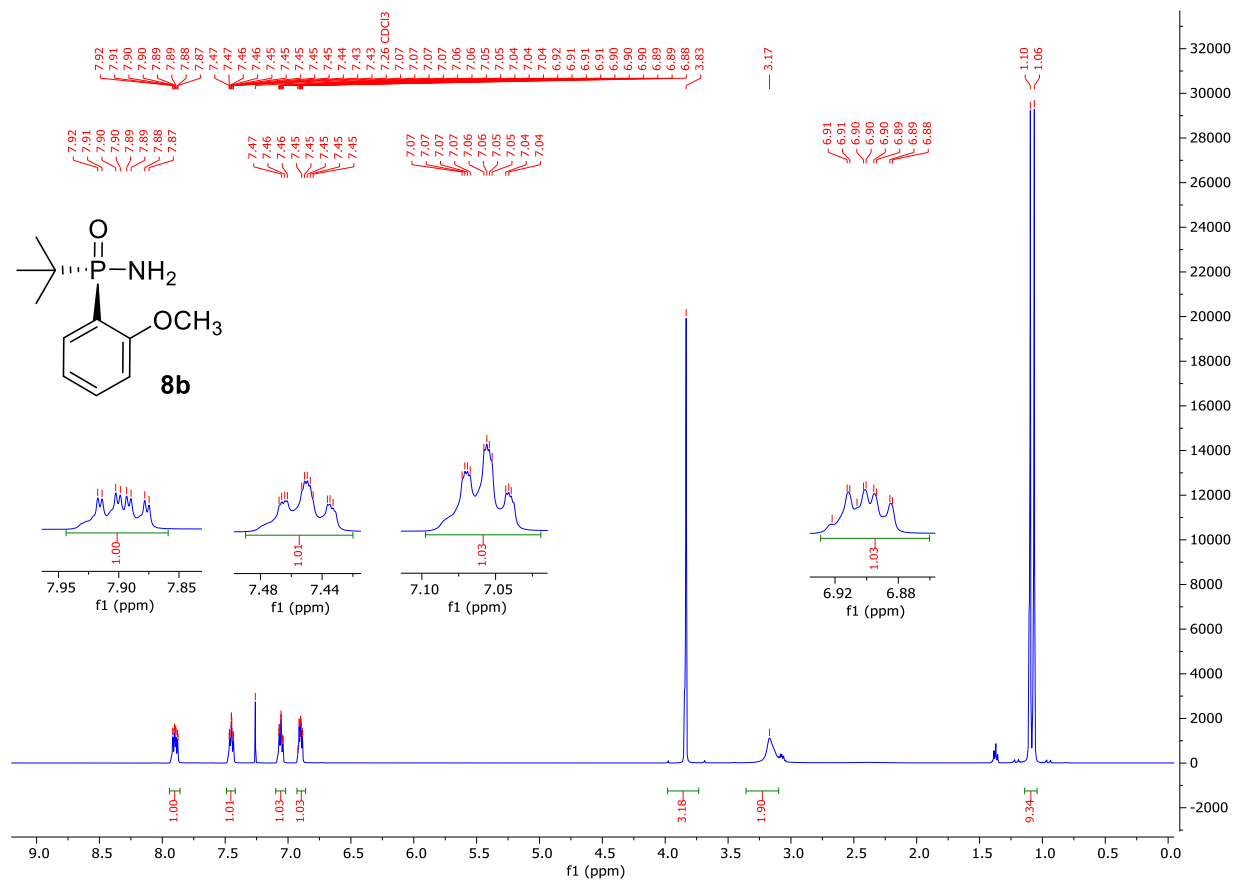

# <sup>31</sup>P NMR of **8b**

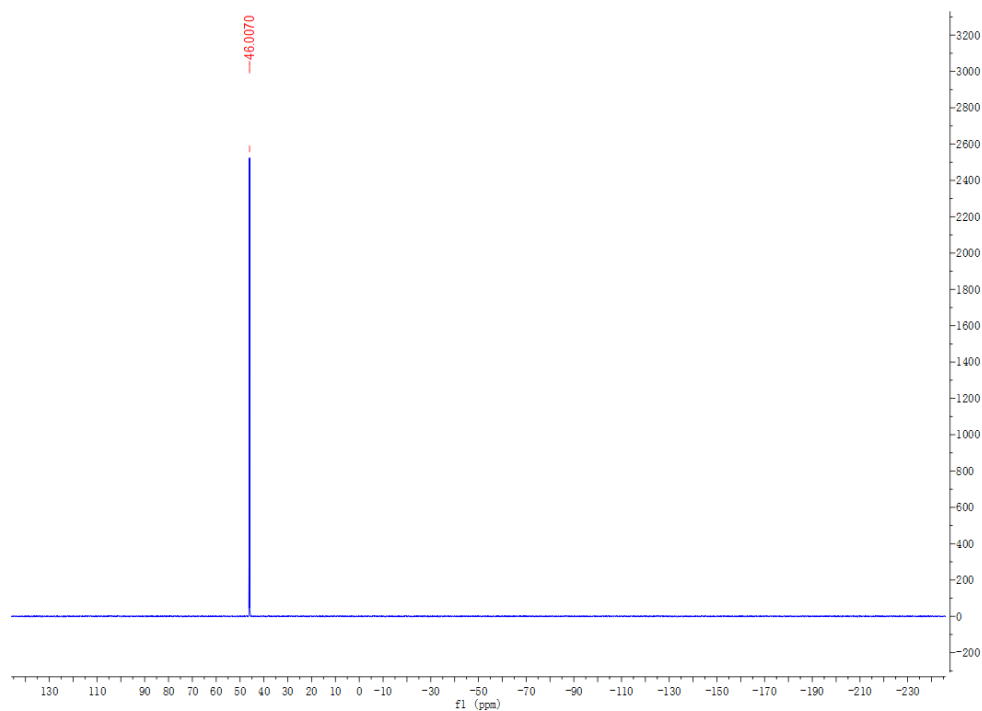

# <sup>13</sup>C NMR of **8b**

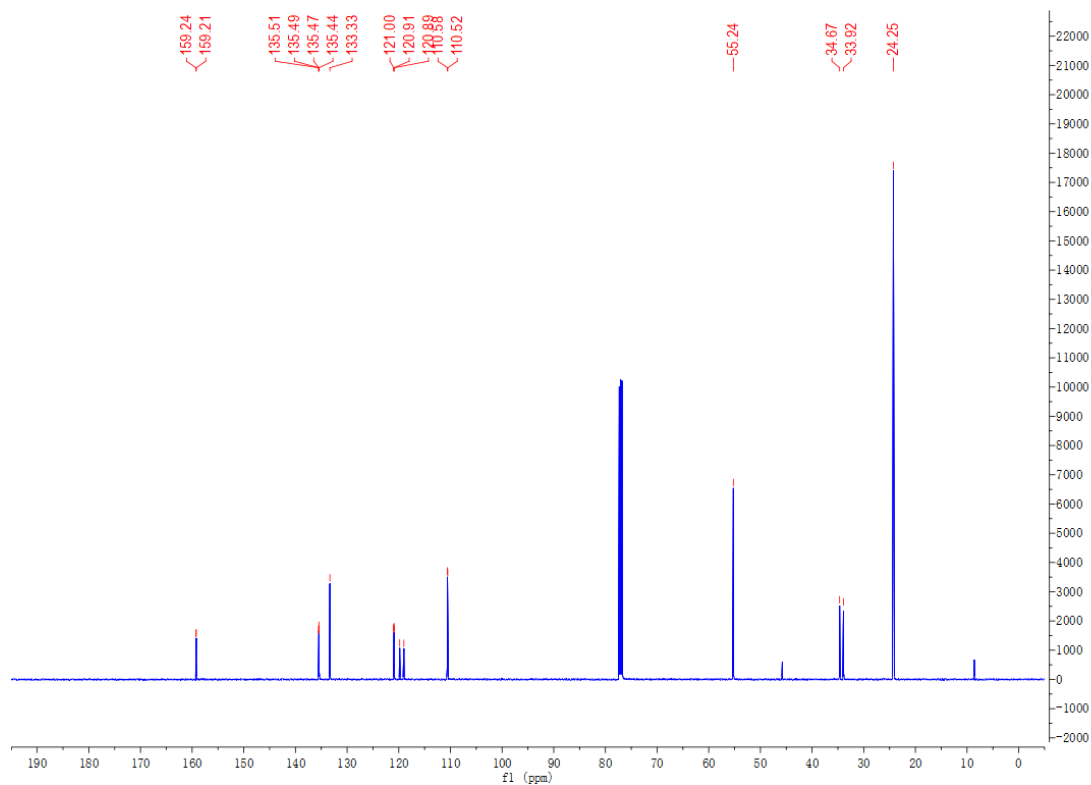

## Chiral HPLC chromatograms of **8b**

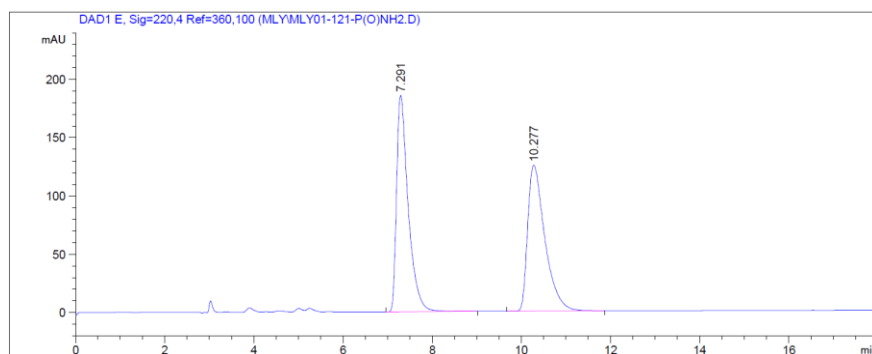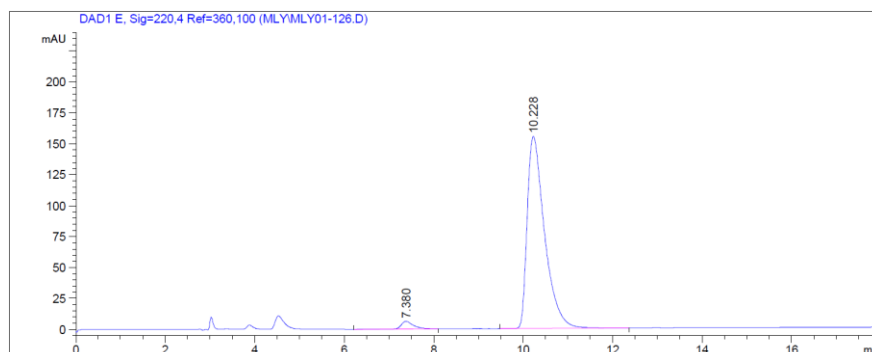

| Peak # | RetTime [min] | Type | Width [min] | Area [mAU*s] | Height [mAU] | Area %  |
|--------|---------------|------|-------------|--------------|--------------|---------|
| 1      | 7.380         | BB   | 0.2838      | 118.71608    | 6.18996      | 2.7608  |
| 2      | 10.228        | BB   | 0.4025      | 4181.28223   | 155.10017    | 97.2392 |

### $^1\text{H}$ NMR of **8c**

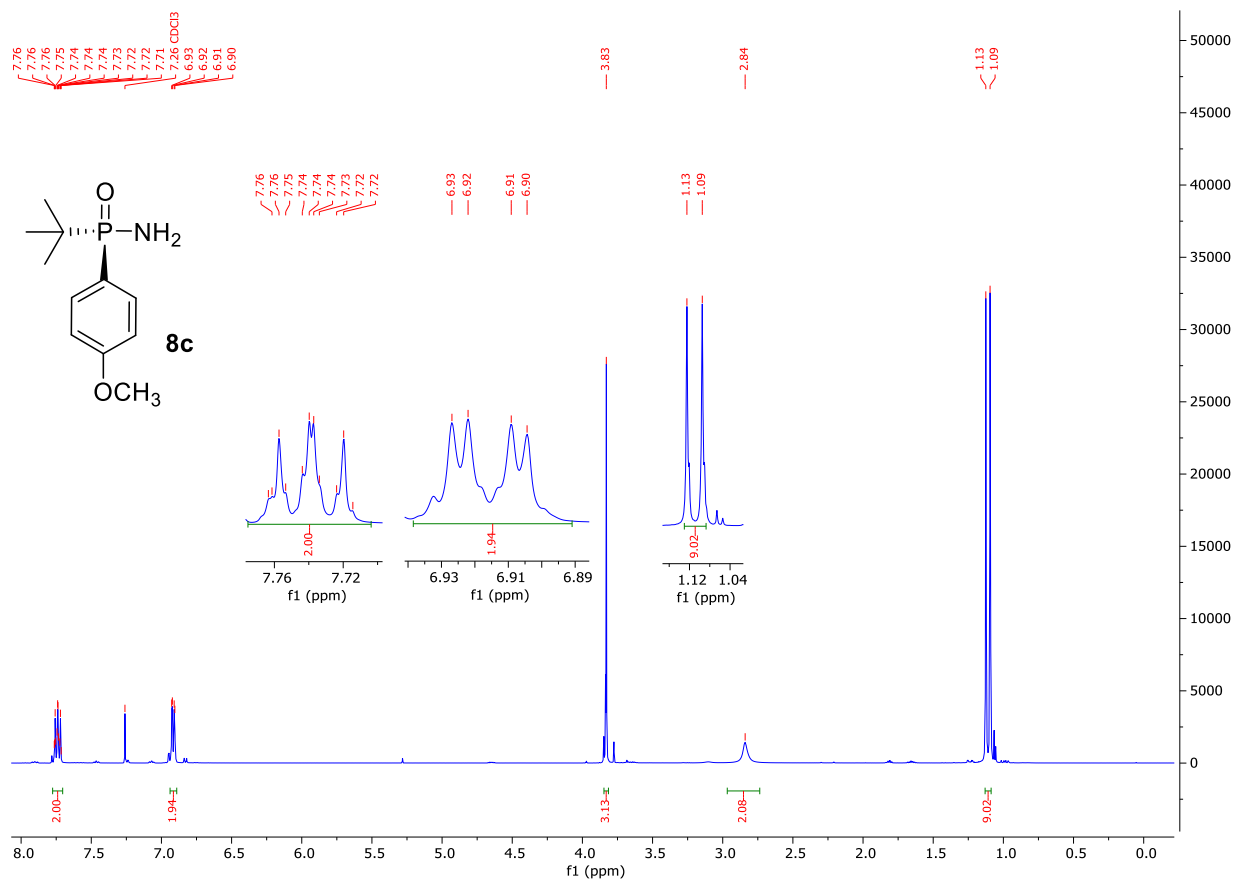

### $^{31}\text{P}$ NMR of **8c**

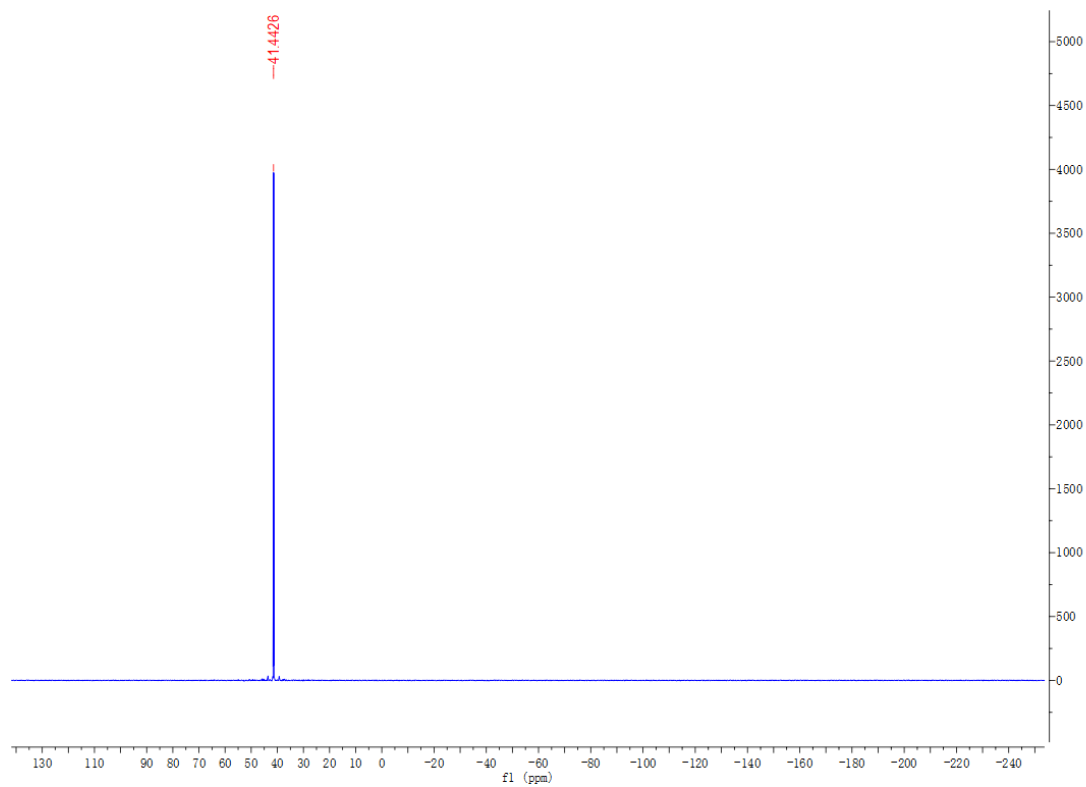

### <sup>13</sup>C NMR of **8c**

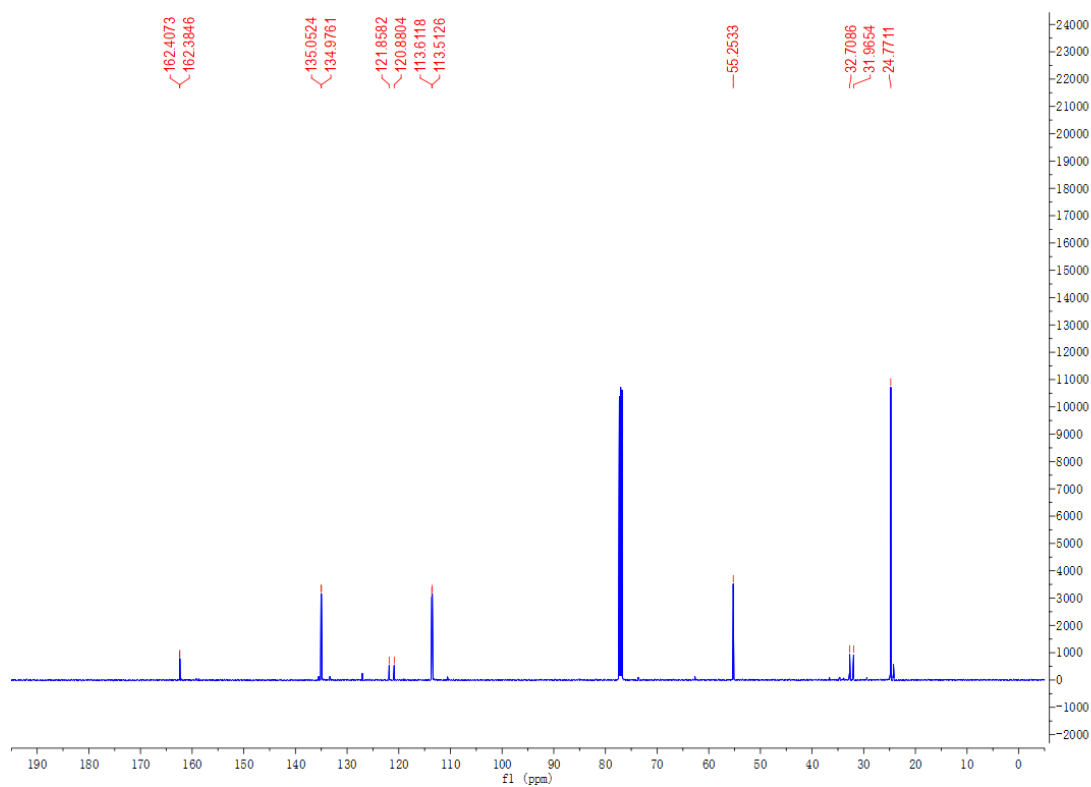

### Chiral HPLC chromatograms of **8c**

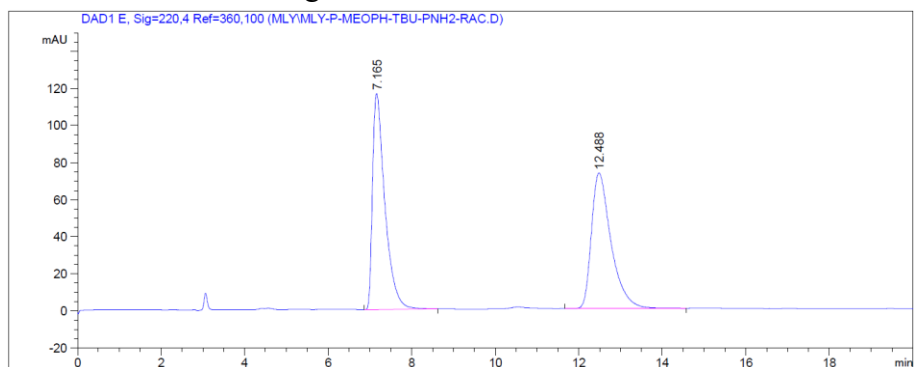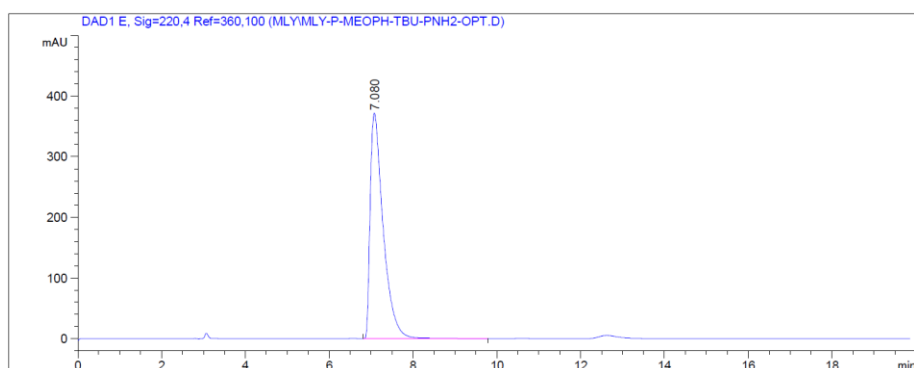

| Peak # | RetTime [min] | Type | Width [min] | Area [mAU*s] | Height [mAU] | Area %   |
|--------|---------------|------|-------------|--------------|--------------|----------|
| 1      | 7.080         | VV   | 0.3243      | 8036.97559   | 371.68729    | 100.0000 |

# <sup>1</sup>H NMR of 8d

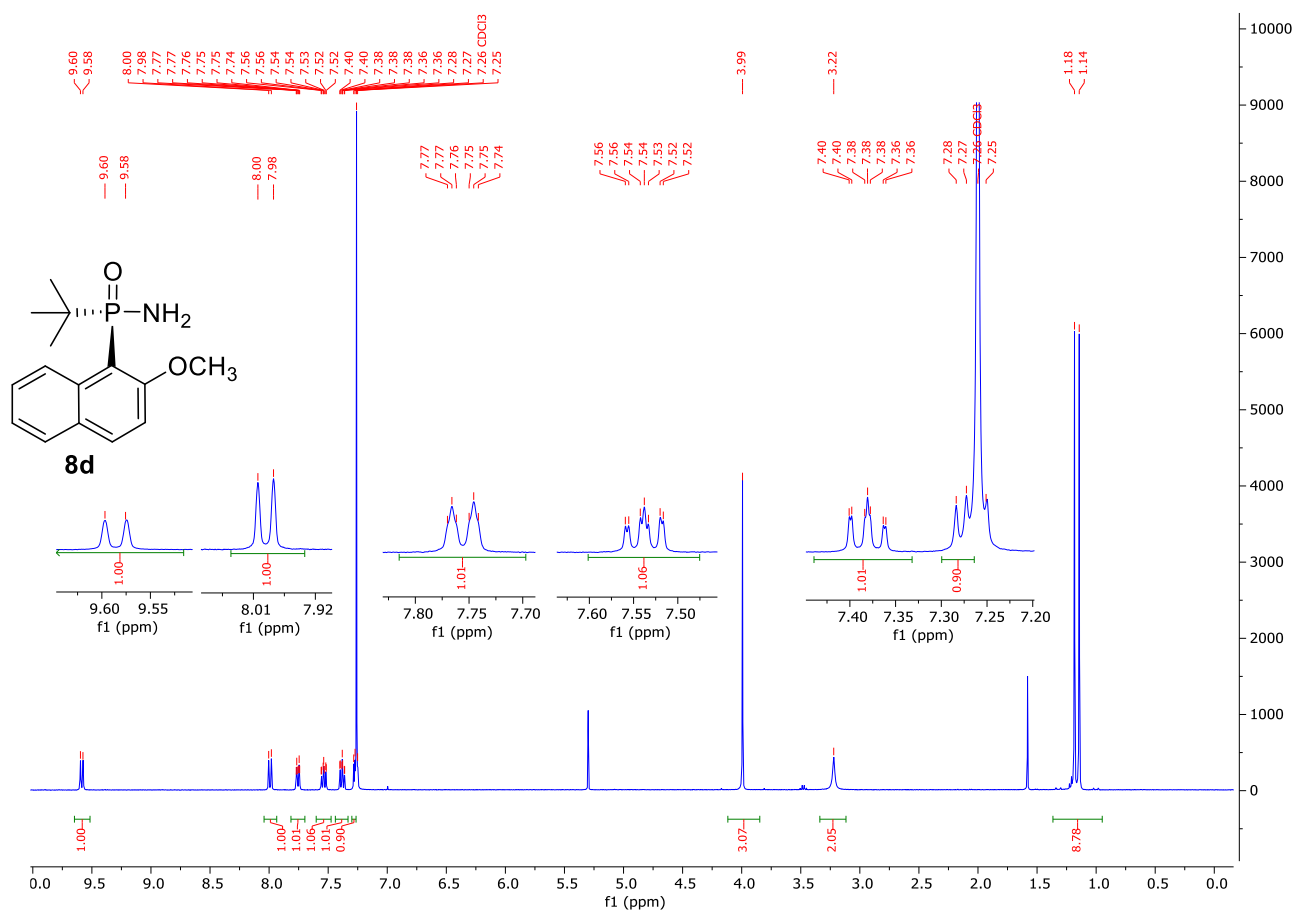

# <sup>31</sup>P NMR of 8d

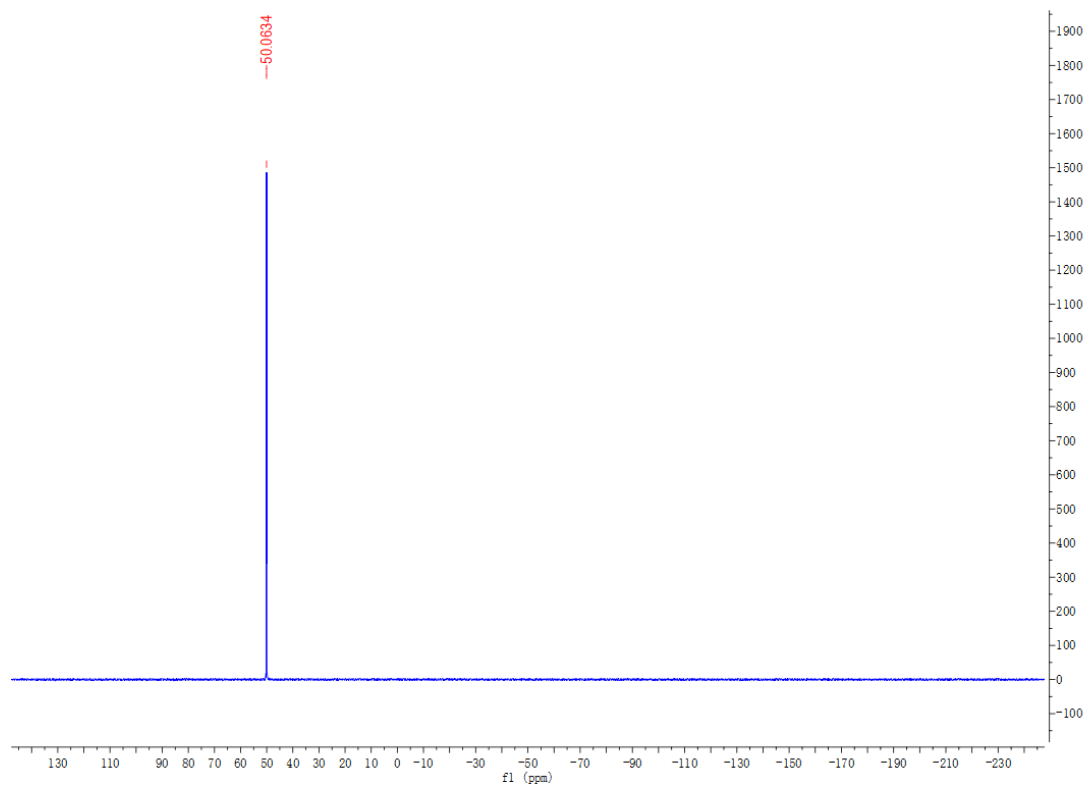

### <sup>13</sup>C NMR of **8d**

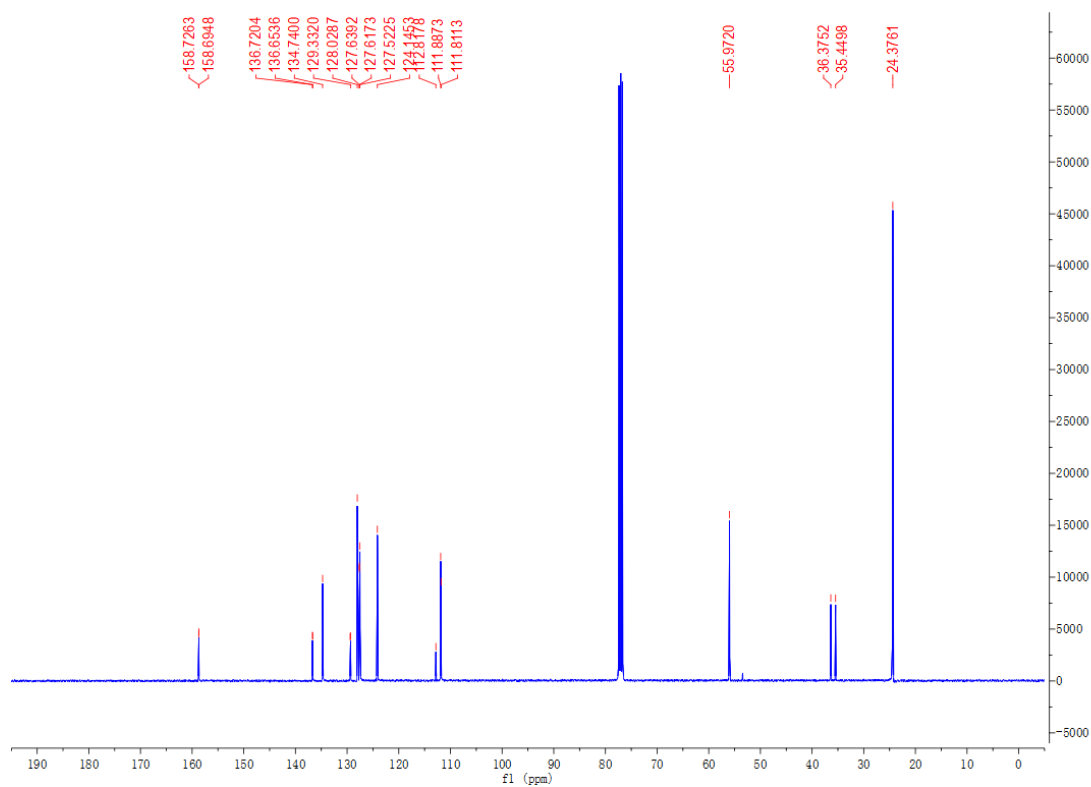

### Chiral HPLC chromatograms of **8d**

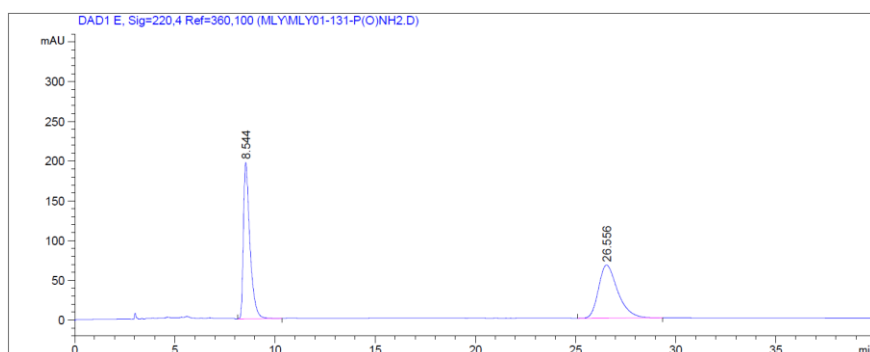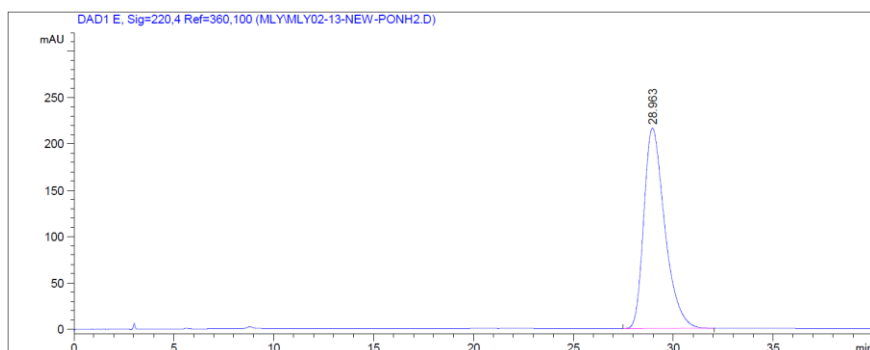

| Peak # | RetTime [min] | Type | Width [min] | Area [mAU*s] | Height [mAU] | Area %   |
|--------|---------------|------|-------------|--------------|--------------|----------|
| 1      | 28.963        | BB   | 1.0990      | 1.57264e4    | 216.10506    | 100.0000 |



# <sup>1</sup>H NMR of 8e

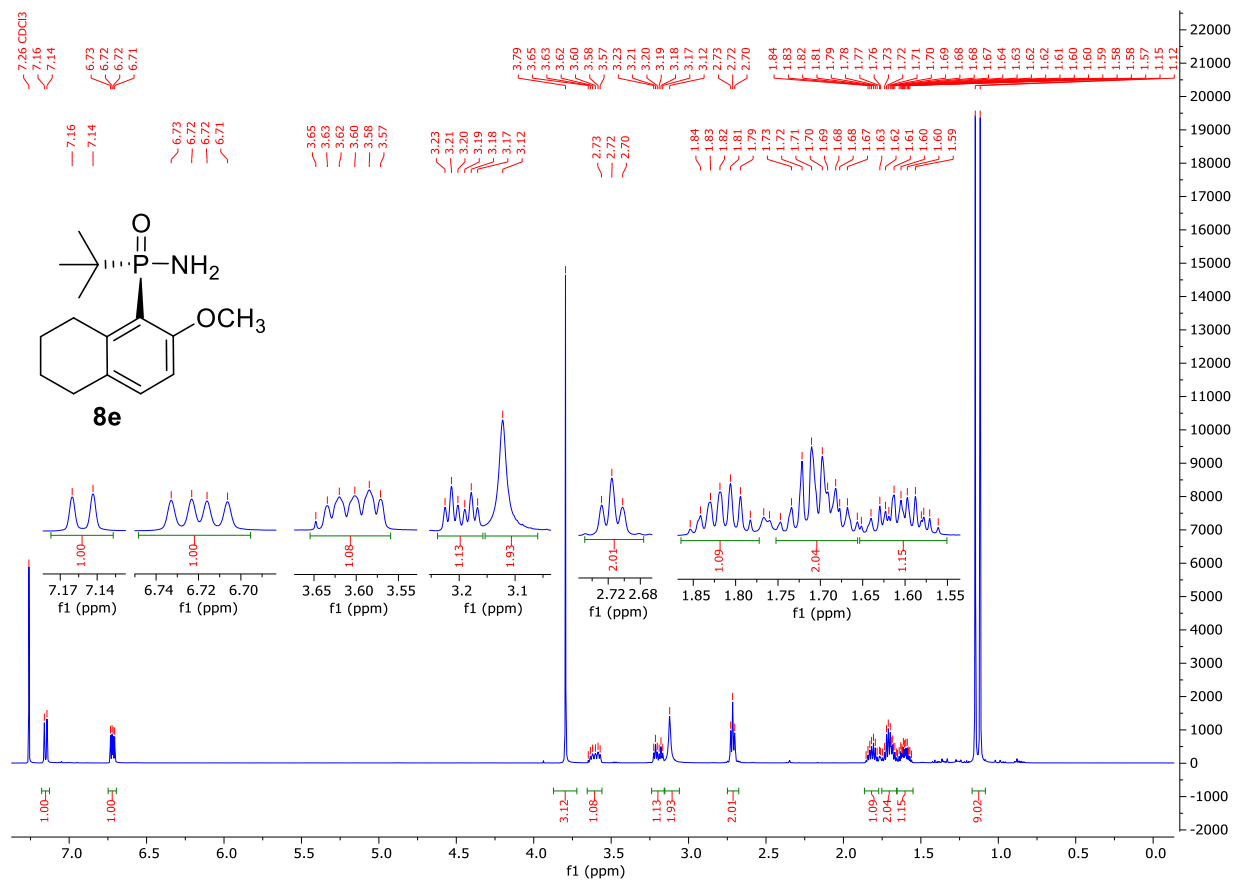

# <sup>31</sup>P NMR of 8e

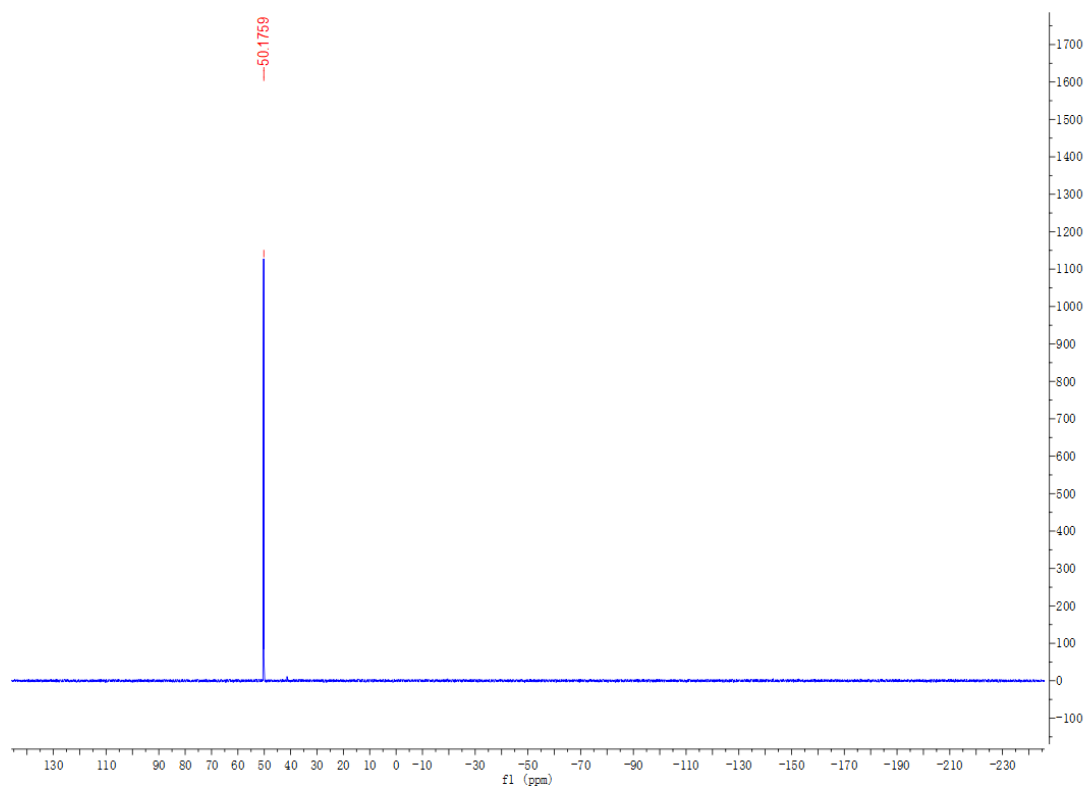

### <sup>13</sup>C NMR of **8e**

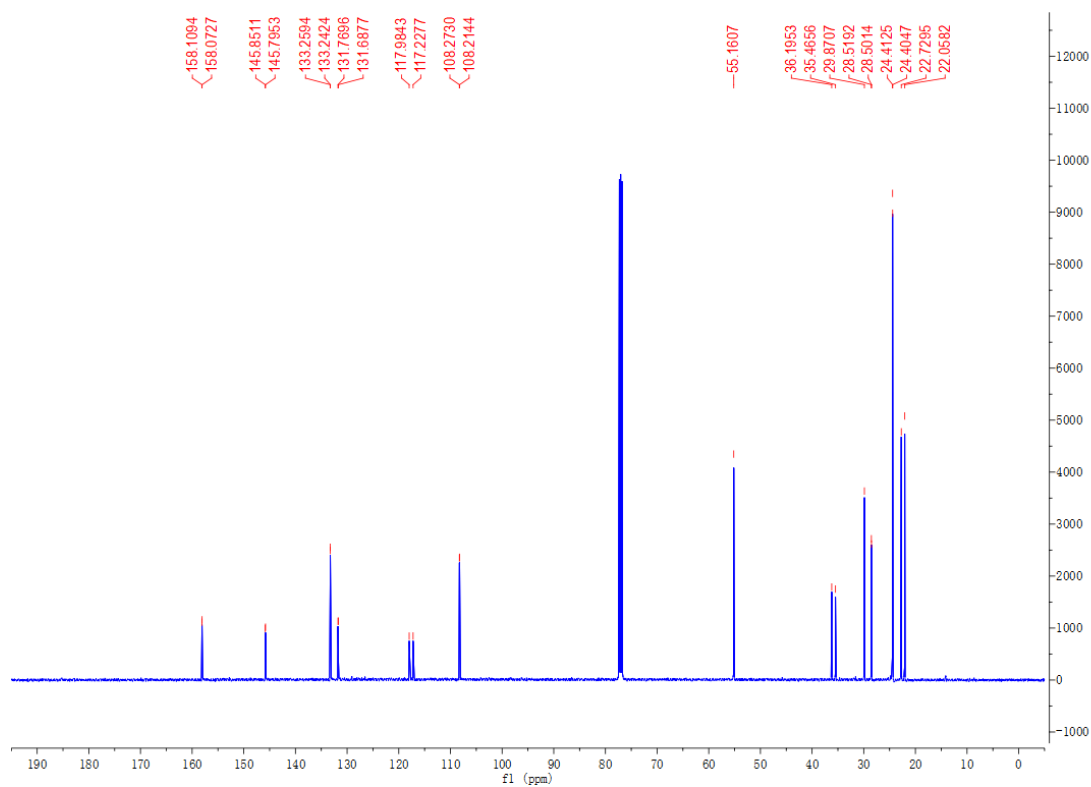

### Chiral HPLC chromatograms of **8e**

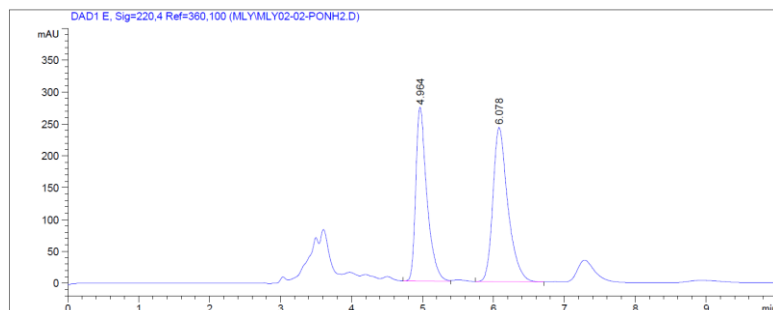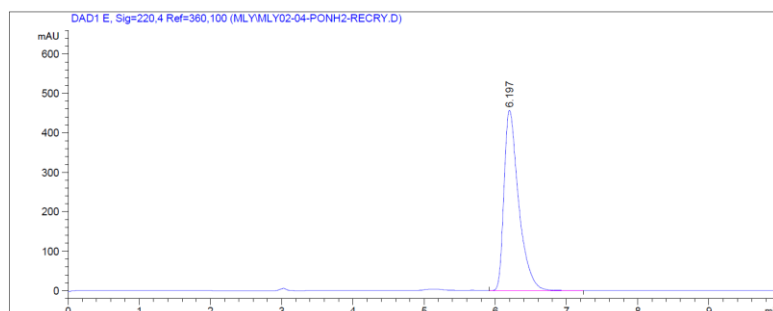

| Peak # | RetTime [min] | Type | Width [min] | Area [mAU*s] | Height [mAU] | Area %   |
|--------|---------------|------|-------------|--------------|--------------|----------|
| 1      | 6.197         | BV   | 0.2148      | 6538.37207   | 457.20520    | 100.0000 |

# <sup>1</sup>H NMR of **8f**

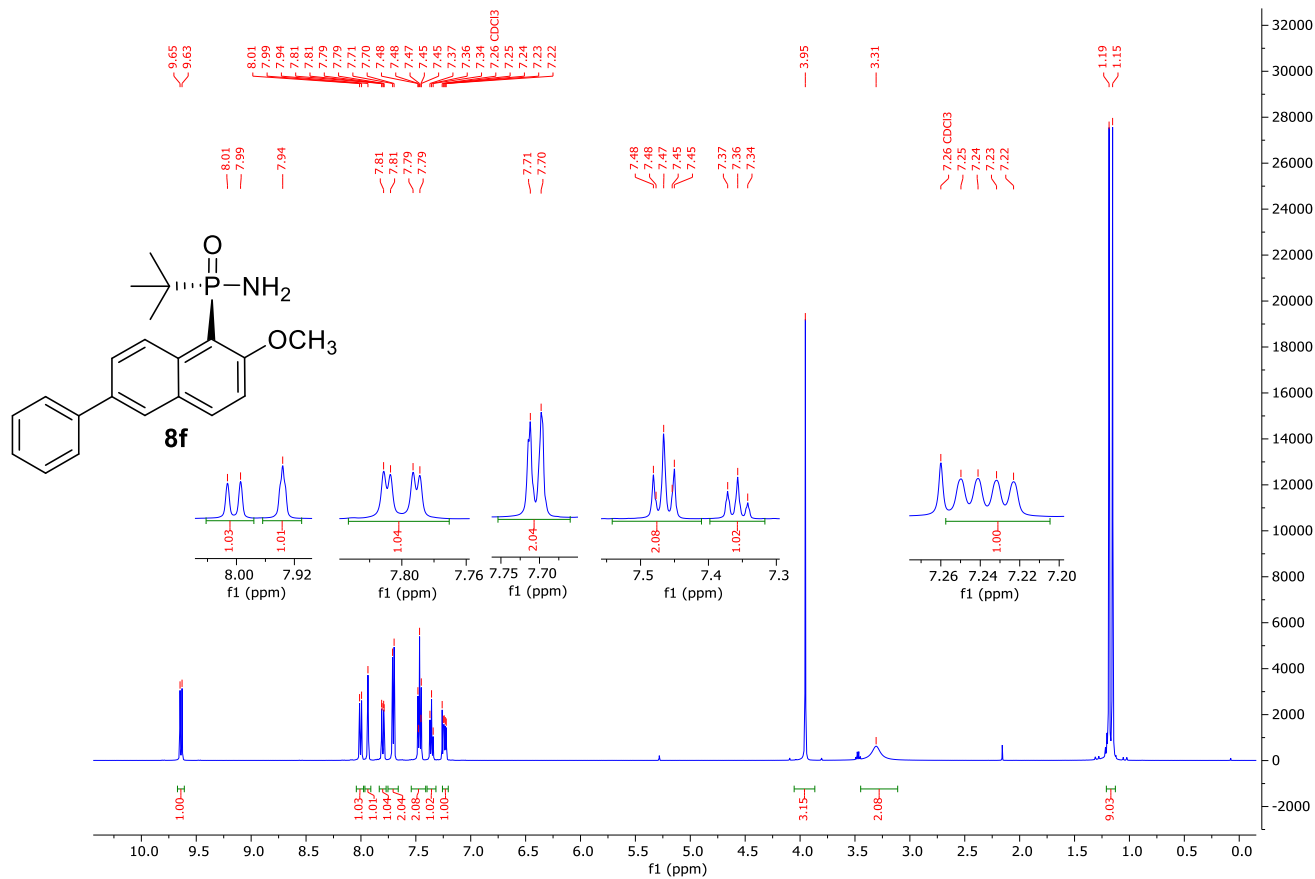

# <sup>31</sup>P NMR of **8f**

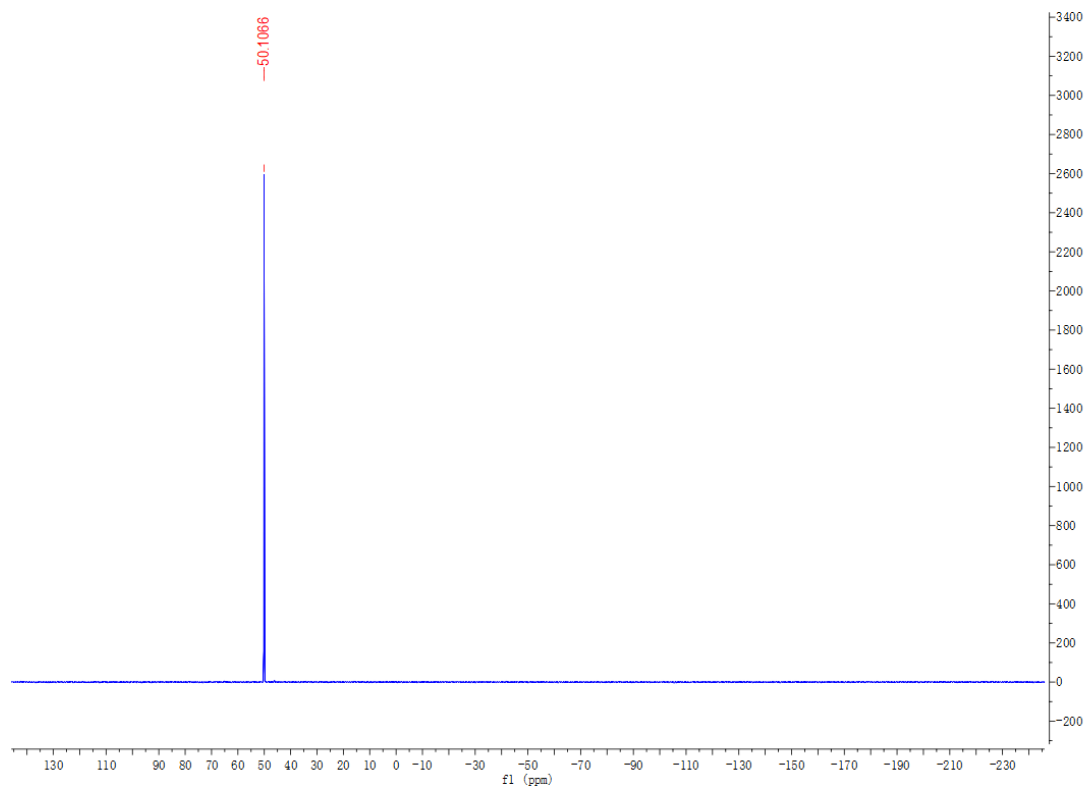

### <sup>13</sup>C NMR of **8f**

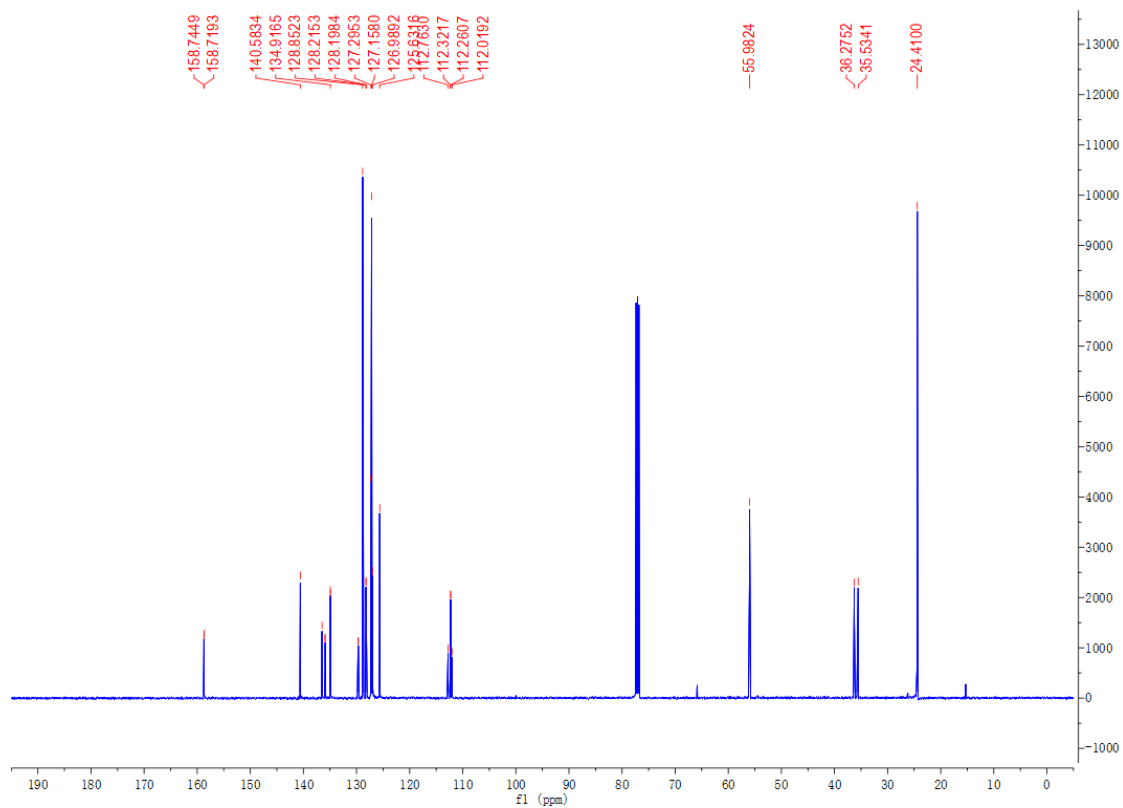

### Chiral HPLC chromatograms of **8f**

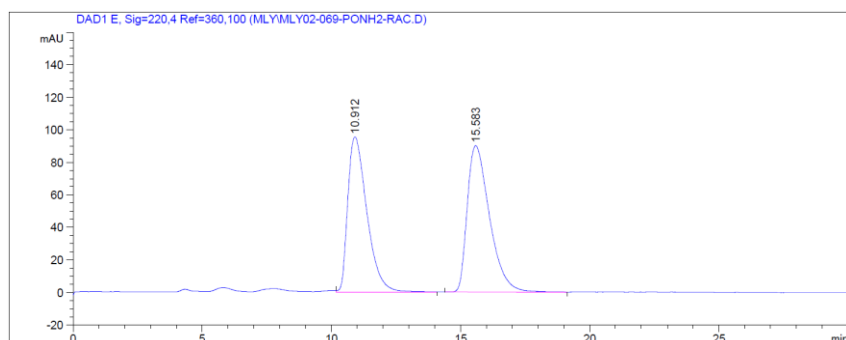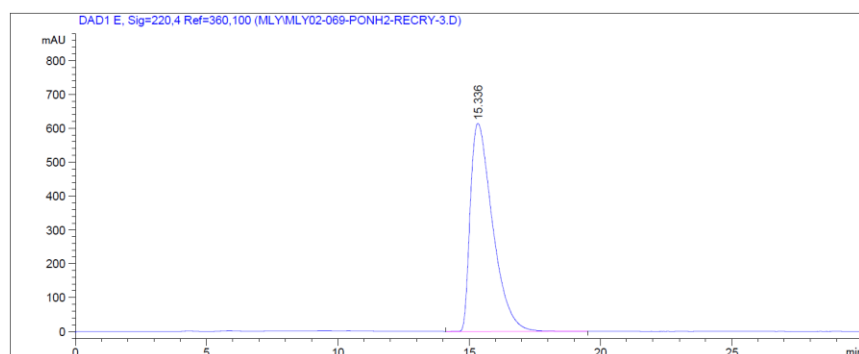

| Peak # | RetTime [min] | Type | Width [min] | Area [mAU*s] | Height [mAU] | Area %   |
|--------|---------------|------|-------------|--------------|--------------|----------|
| 1      | 15.336        | BV   | 0.9039      | 3.62257e4    | 614.41528    | 100.0000 |



### <sup>13</sup>C NMR of 11a

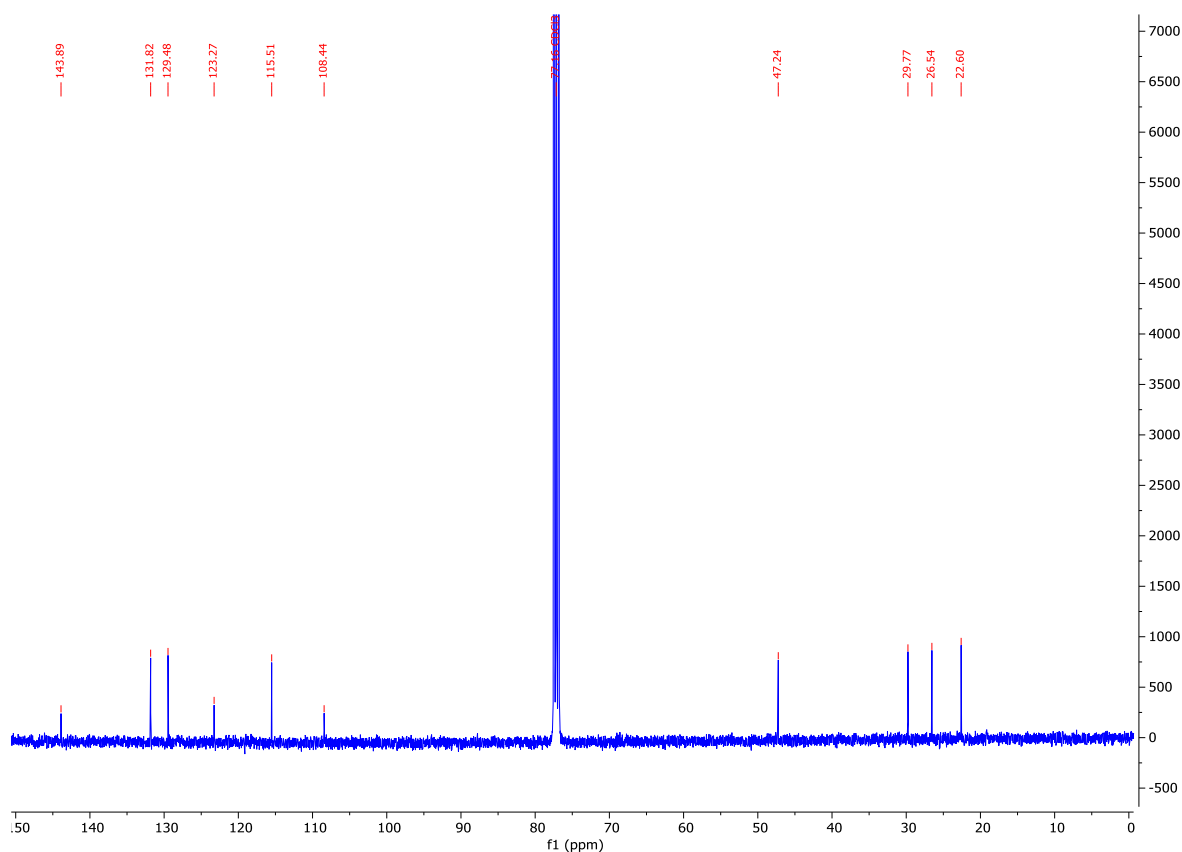

### Chiral HPLC Chromatograms of 11a

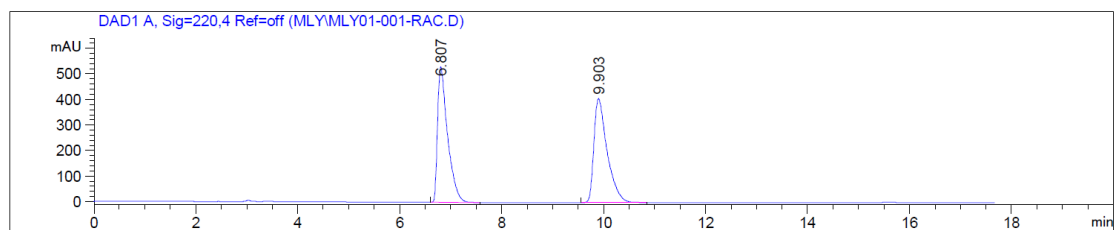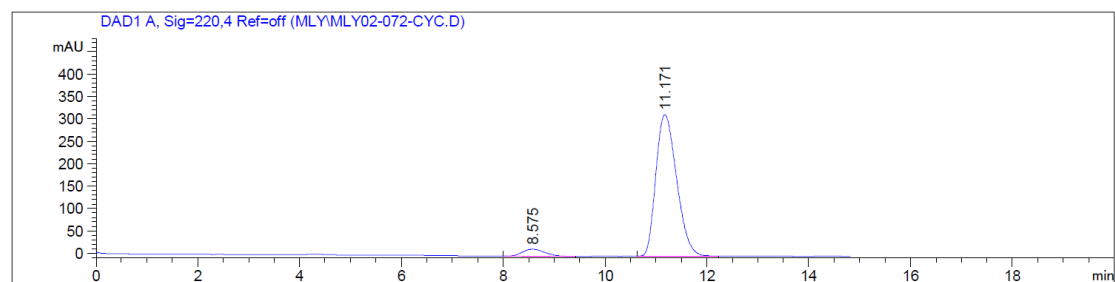

| Peak # | RetTime [min] | Type | Width [min] | Area [mAU*s] | Height [mAU] | Area %  |
|--------|---------------|------|-------------|--------------|--------------|---------|
| 1      | 8.575         | BB   | 0.4773      | 492.90408    | 16.00656     | 5.2228  |
| 2      | 11.171        | BB   | 0.4480      | 8944.63574   | 316.22061    | 94.7772 |

For comparison compound **11a** was also analyzed using a chiracel OJ-H comlun in comparison with the literature.<sup>9</sup>

### Chiral HPLC Chromatograms of **11a**

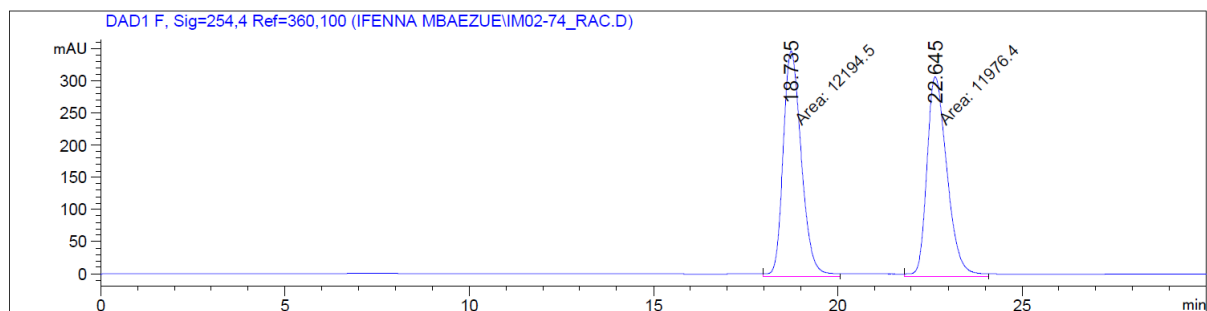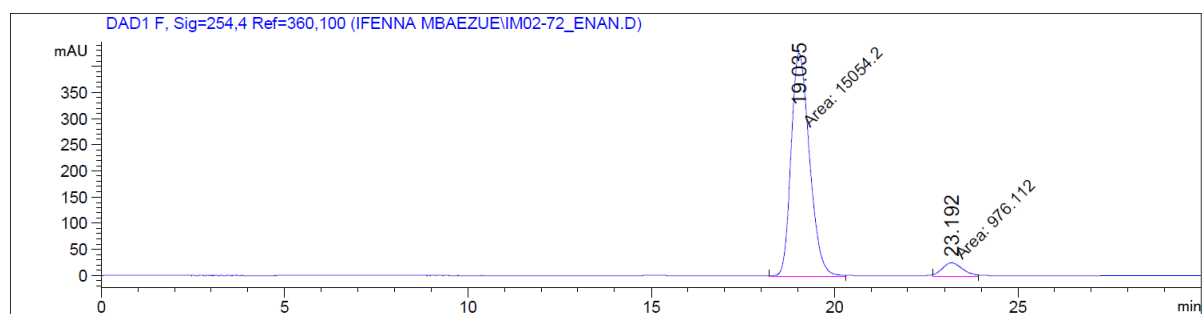

| Peak # | RetTime [min] | Type | Width [min] | Area [mAU*s] | Height [mAU] | Area %  |
|--------|---------------|------|-------------|--------------|--------------|---------|
| 1      | 19.035        | MM   | 0.5867      | 1.50542e4    | 427.68332    | 93.9108 |
| 2      | 23.192        | MM   | 0.6424      | 976.11206    | 25.32313     | 6.0892  |

### Chiral HPLC Chromatogram of crystallized product **11a**

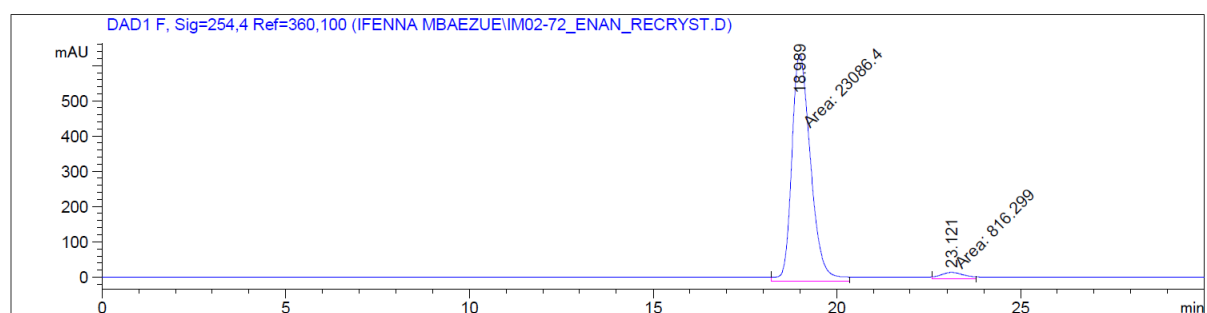

| Peak # | RetTime [min] | Type | Width [min] | Area [mAU*s] | Height [mAU] | Area %  |
|--------|---------------|------|-------------|--------------|--------------|---------|
| 1      | 18.989        | MM   | 0.5980      | 2.30864e4    | 643.44177    | 96.5849 |
| 2      | 23.121        | MM   | 0.7581      | 816.29865    | 17.94708     | 3.4151  |

(S)-2-methyl-1,2,3,4-tetrahydroquinoline (**11b**)

<sup>1</sup>H NMR of **11b**

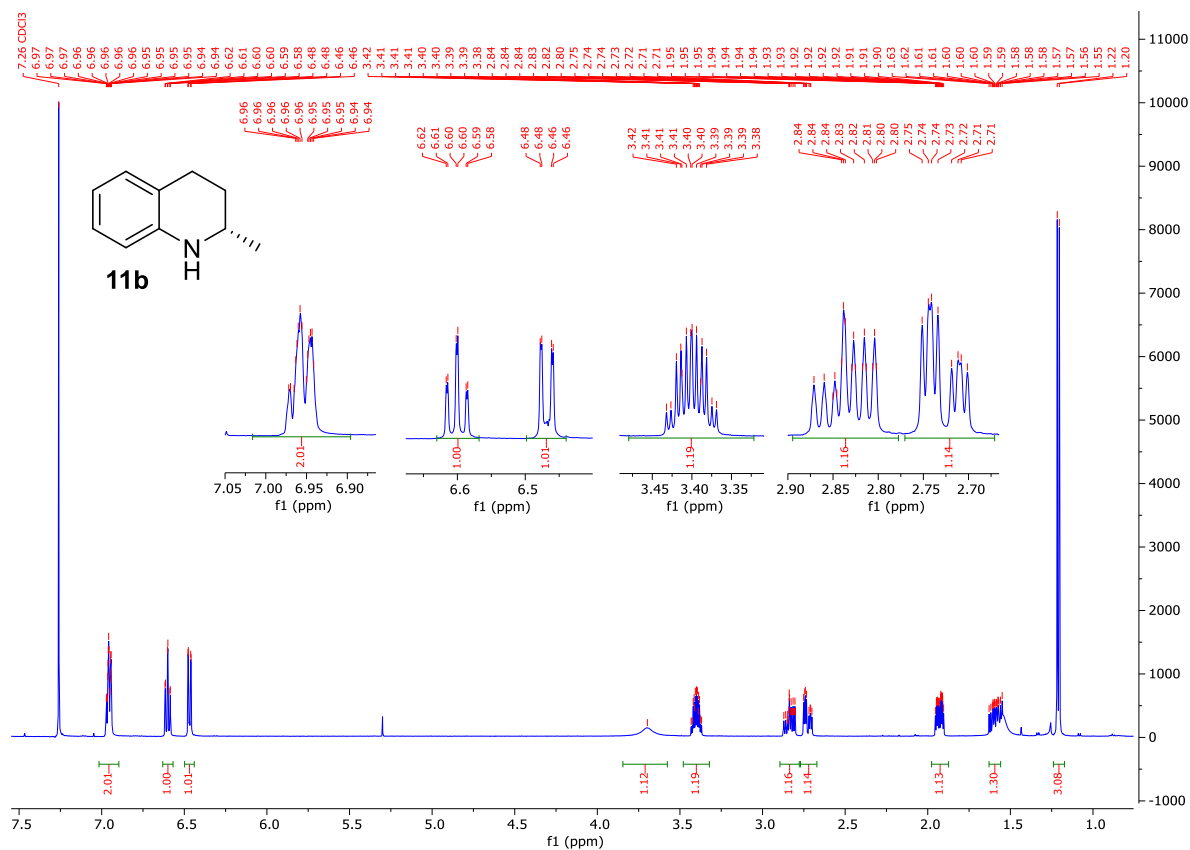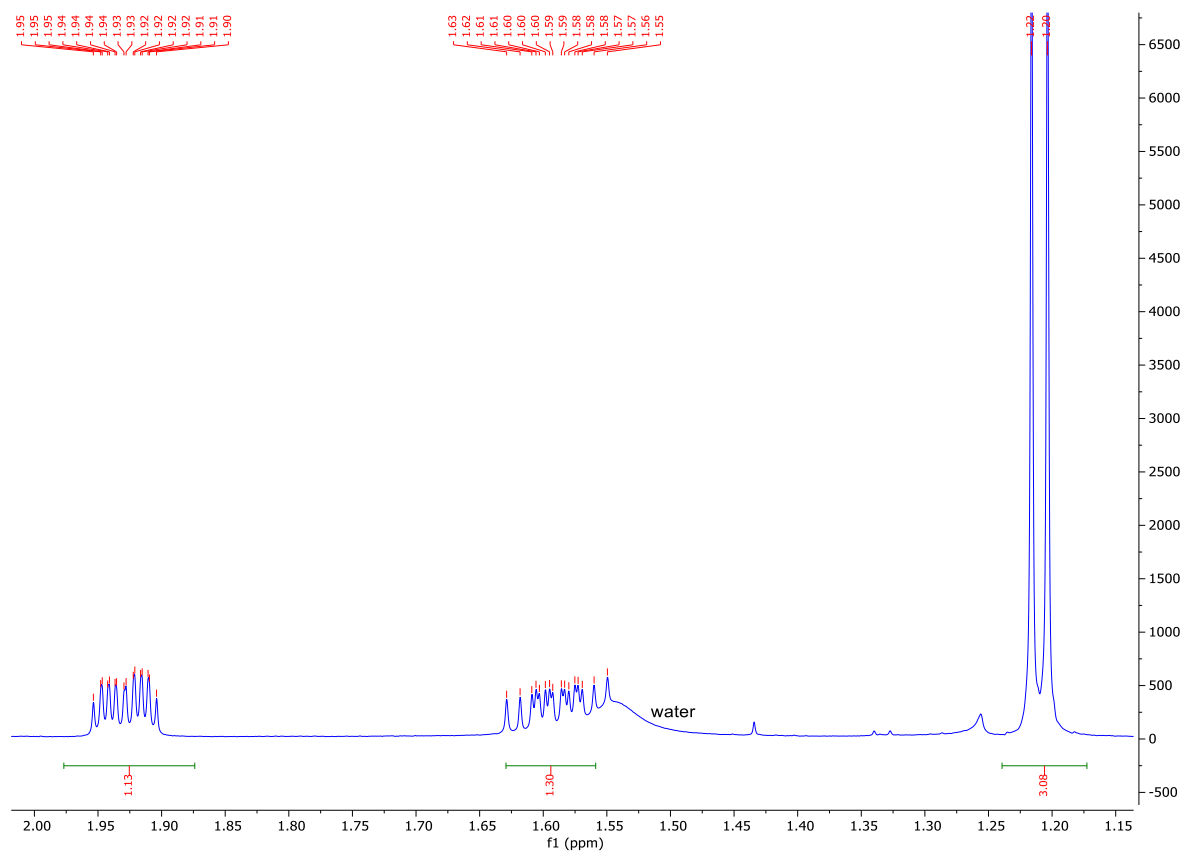



### <sup>13</sup>C NMR of **11b**

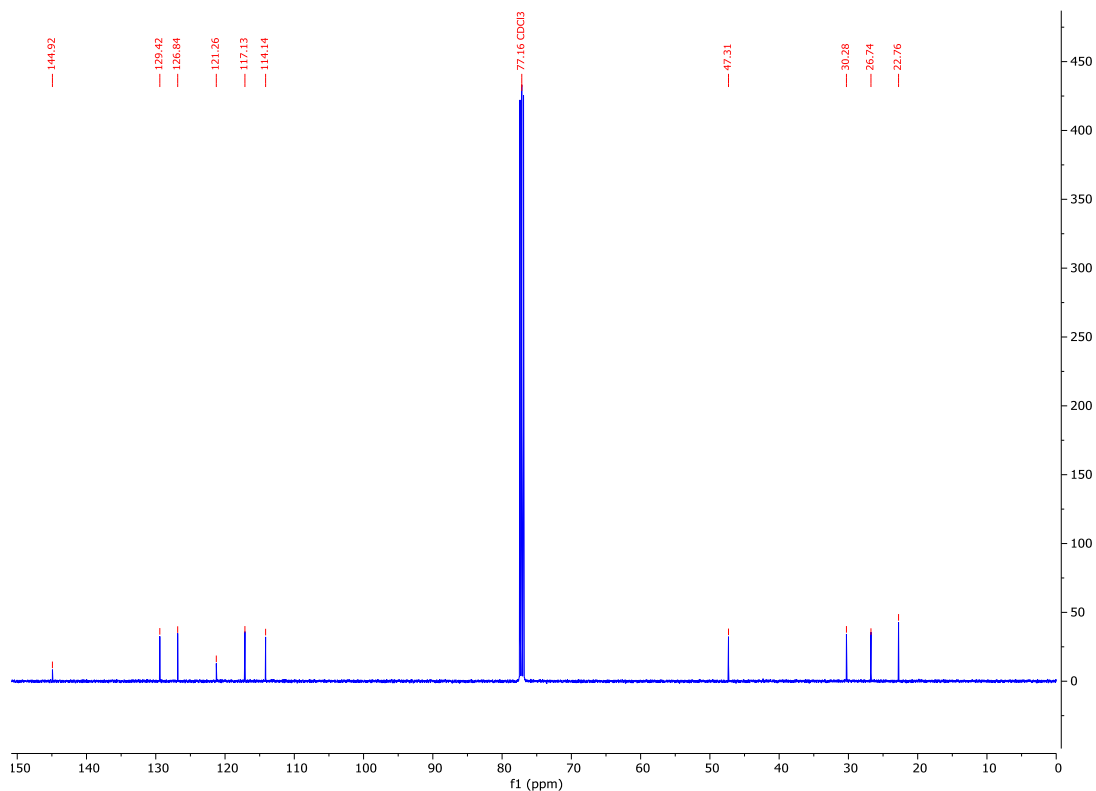

### Chiral HPLC Chromatograms of **11b**

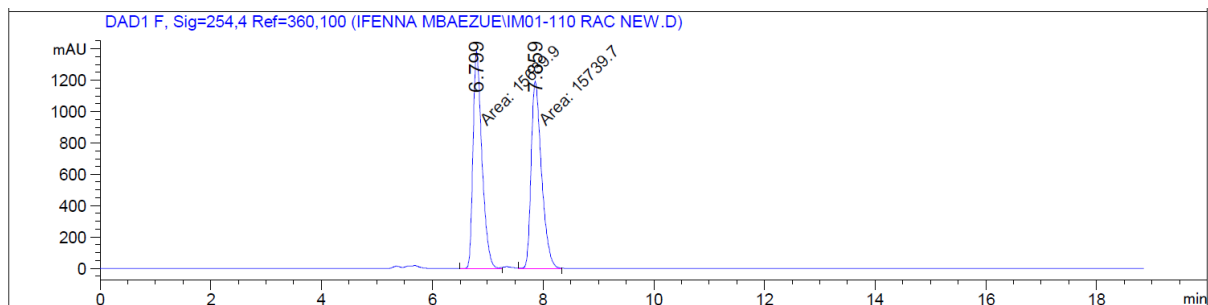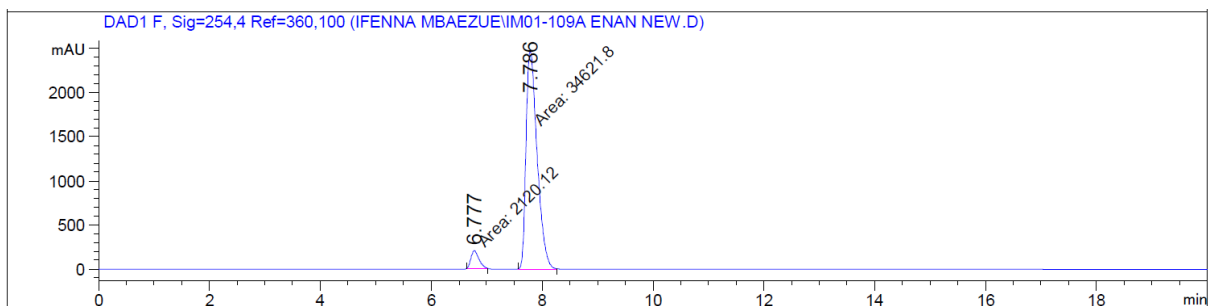

| Peak # | RetTime [min] | Type | Width [min] | Area [mAU*s] | Height [mAU] | Area %  |
|--------|---------------|------|-------------|--------------|--------------|---------|
| 1      | 6.777         | MM   | 0.1708      | 2120.12207   | 206.83456    | 5.7703  |
| 2      | 7.786         | MM   | 0.2332      | 3.46218e4    | 2474.55640   | 94.2297 |

(R)-2-phenyl-1,2,3,4-tetrahydroquinoline (**11c**)

<sup>1</sup>H NMR of **11c**

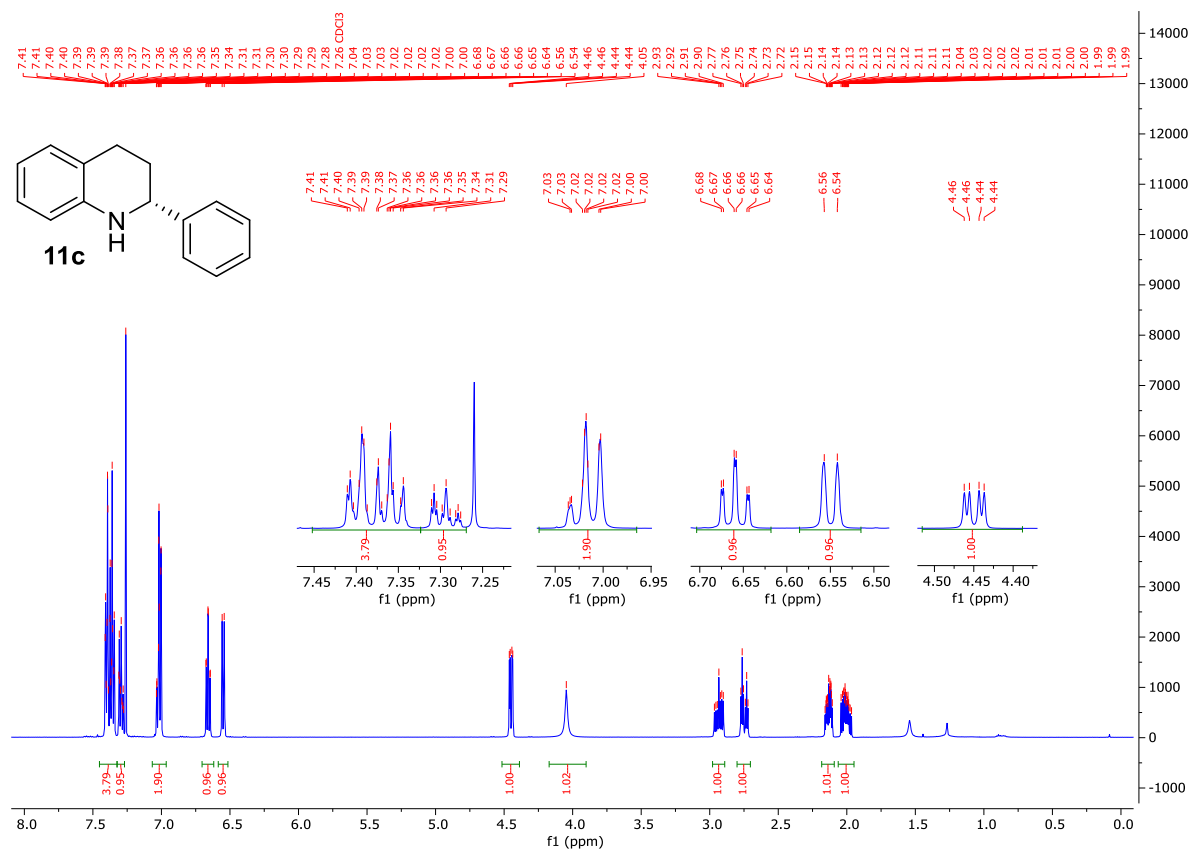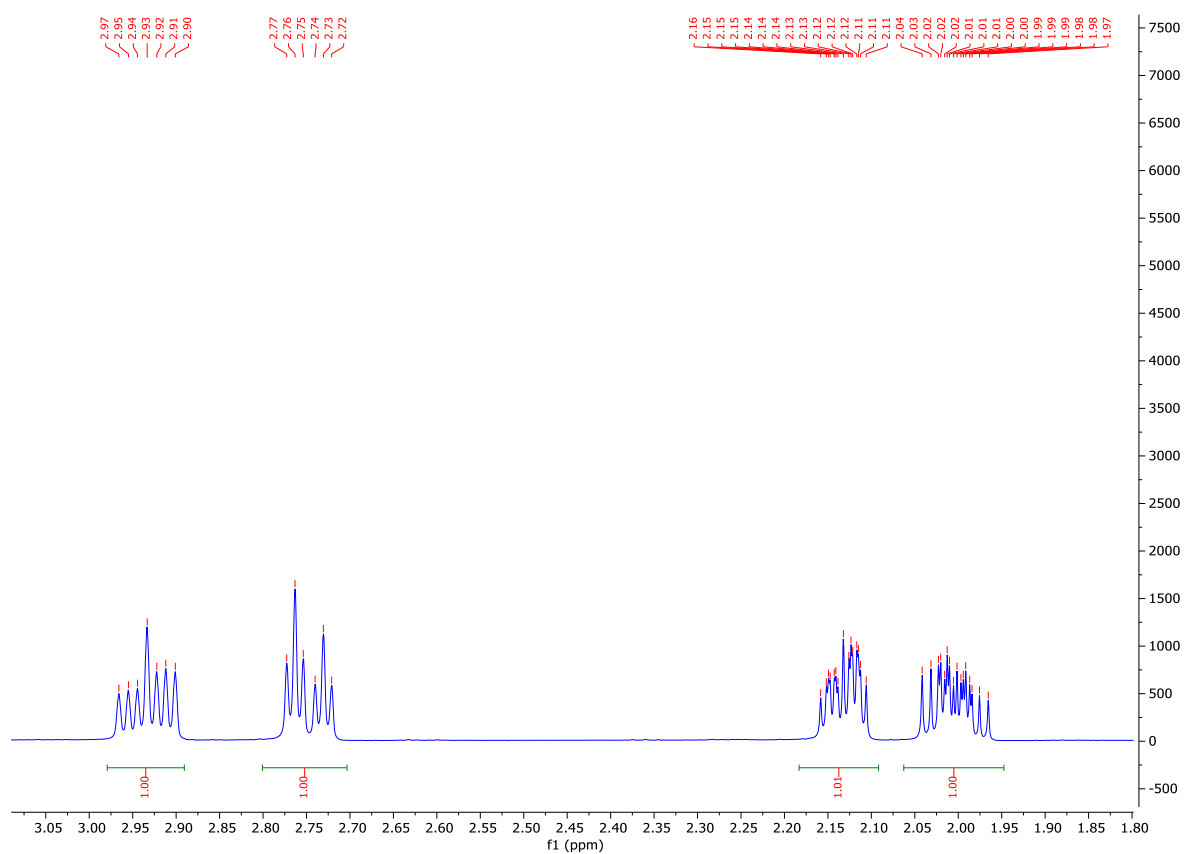

### <sup>13</sup>C NMR of 11c

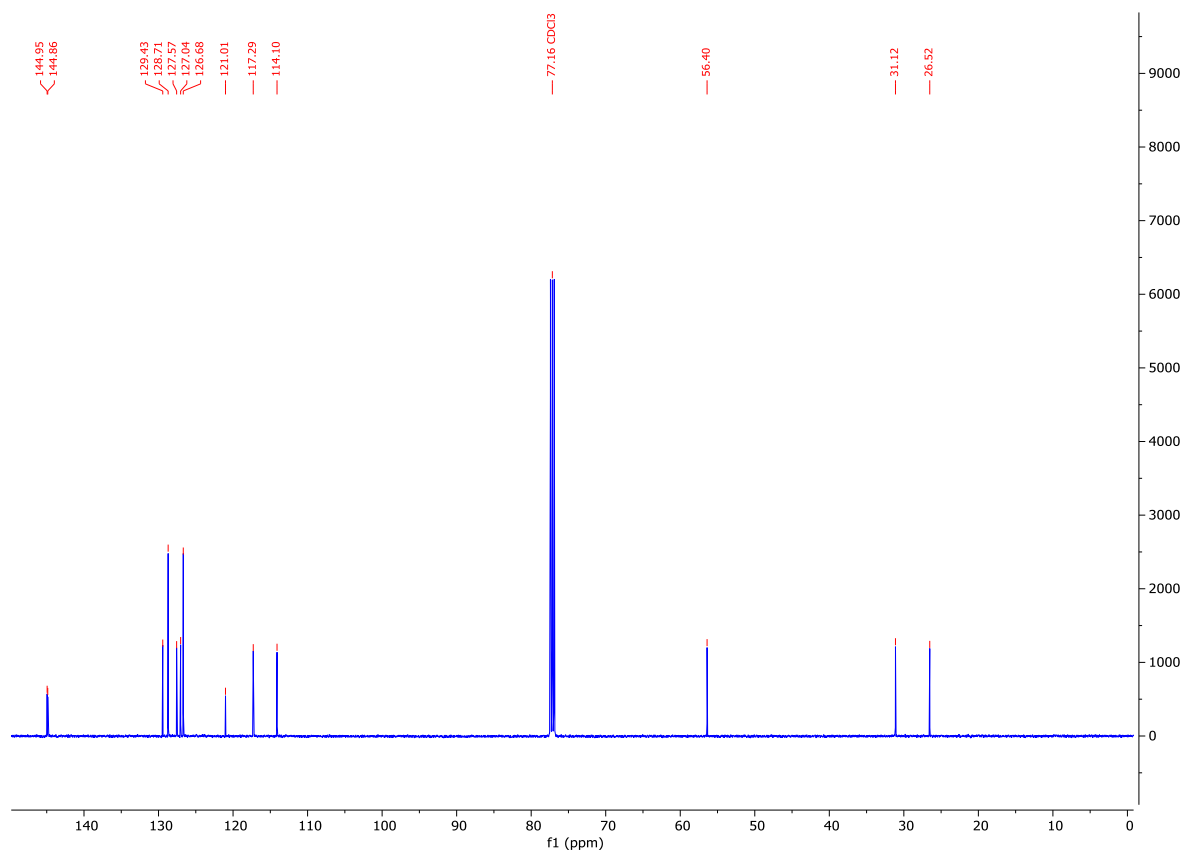

### Chiral HPLC Chromatograms of 11c

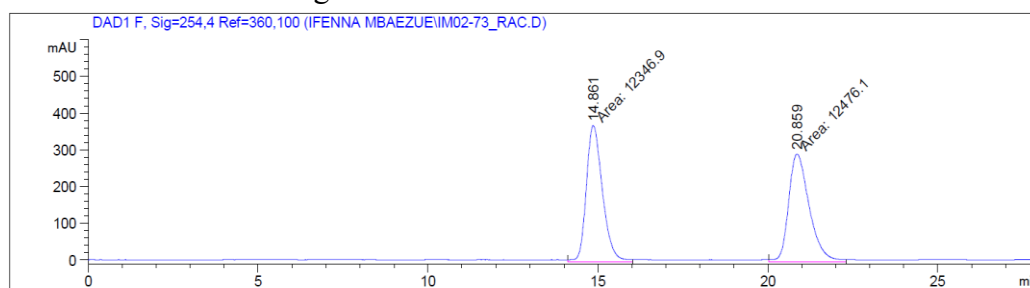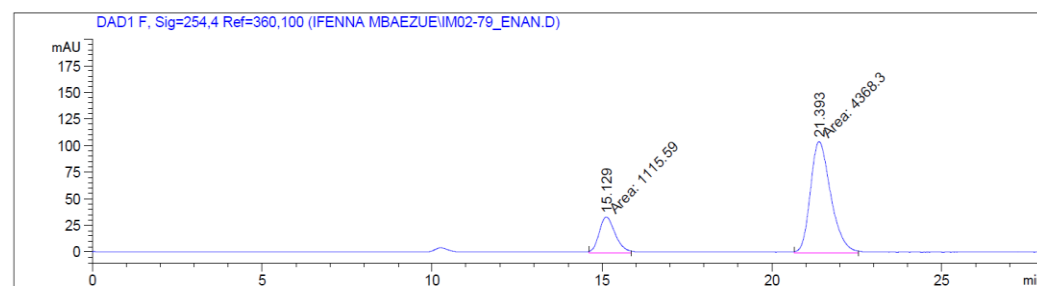

| Peak # | RetTime [min] | Type | Width [min] | Area [mAU*s] | Height [mAU] | Area %  |
|--------|---------------|------|-------------|--------------|--------------|---------|
| 1      | 15.129        | MM   | 0.5518      | 1115.59338   | 33.69407     | 20.3431 |
| 2      | 21.393        | MM   | 0.6967      | 4368.30176   | 104.49825    | 79.6569 |

# (R)-4-methyl-1,2,3,4-tetrahydroquinoline (11d)

## <sup>1</sup>H NMR of 11d

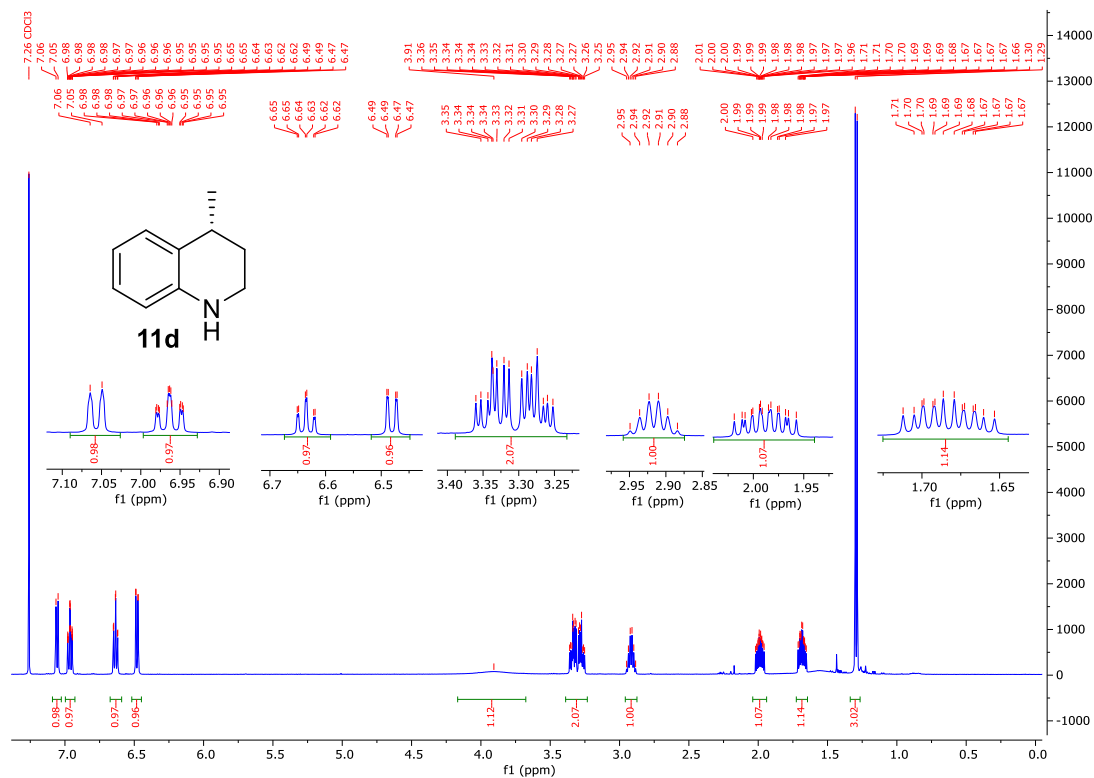

## <sup>13</sup>C NMR of 11d

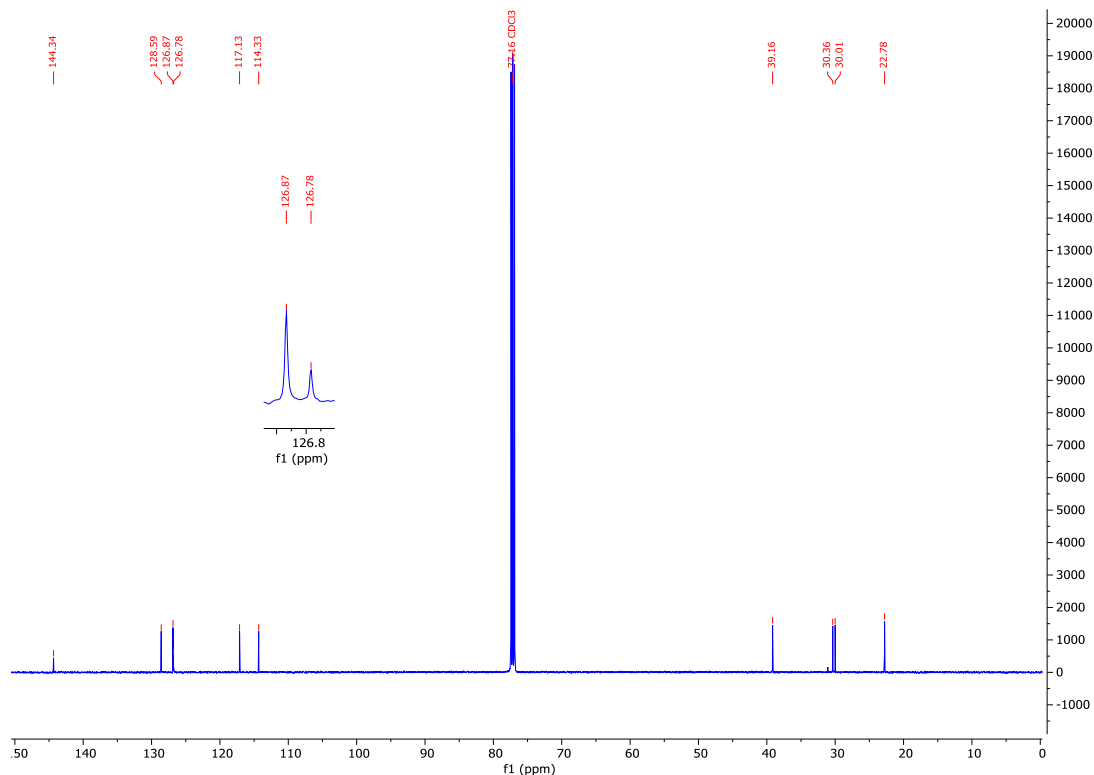

## Chiral HPLC Chromatograms of **11d**

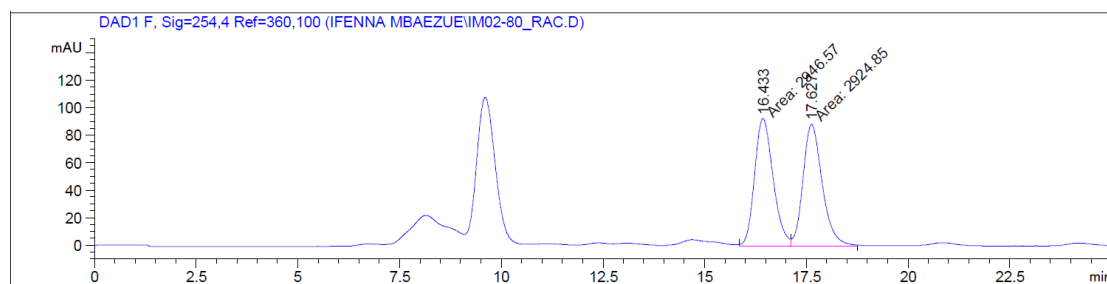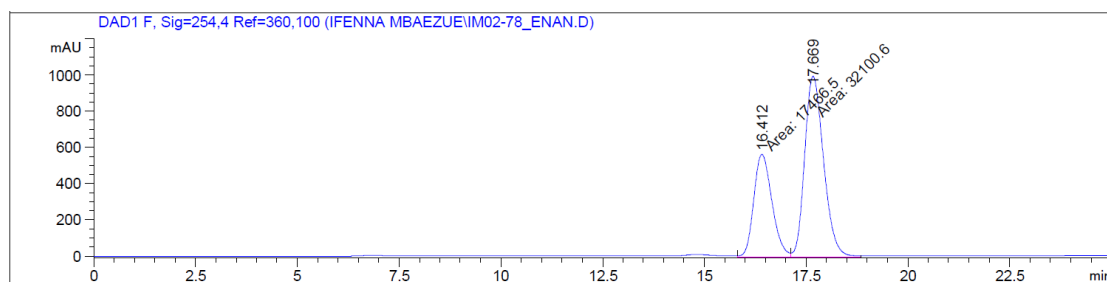

| Peak # | RetTime [min] | Type | Width [min] | Area [mAU*s] | Height [mAU] | Area %  |
|--------|---------------|------|-------------|--------------|--------------|---------|
| 1      | 16.412        | MM   | 0.5150      | 1.74665e4    | 565.20856    | 35.2382 |
| 2      | 17.669        | MM   | 0.5373      | 3.21006e4    | 995.67267    | 64.7618 |

(S)-2-ethyl-1,2,3,4-tetrahydroquinoline (11e)

<sup>1</sup>H NMR of 11e

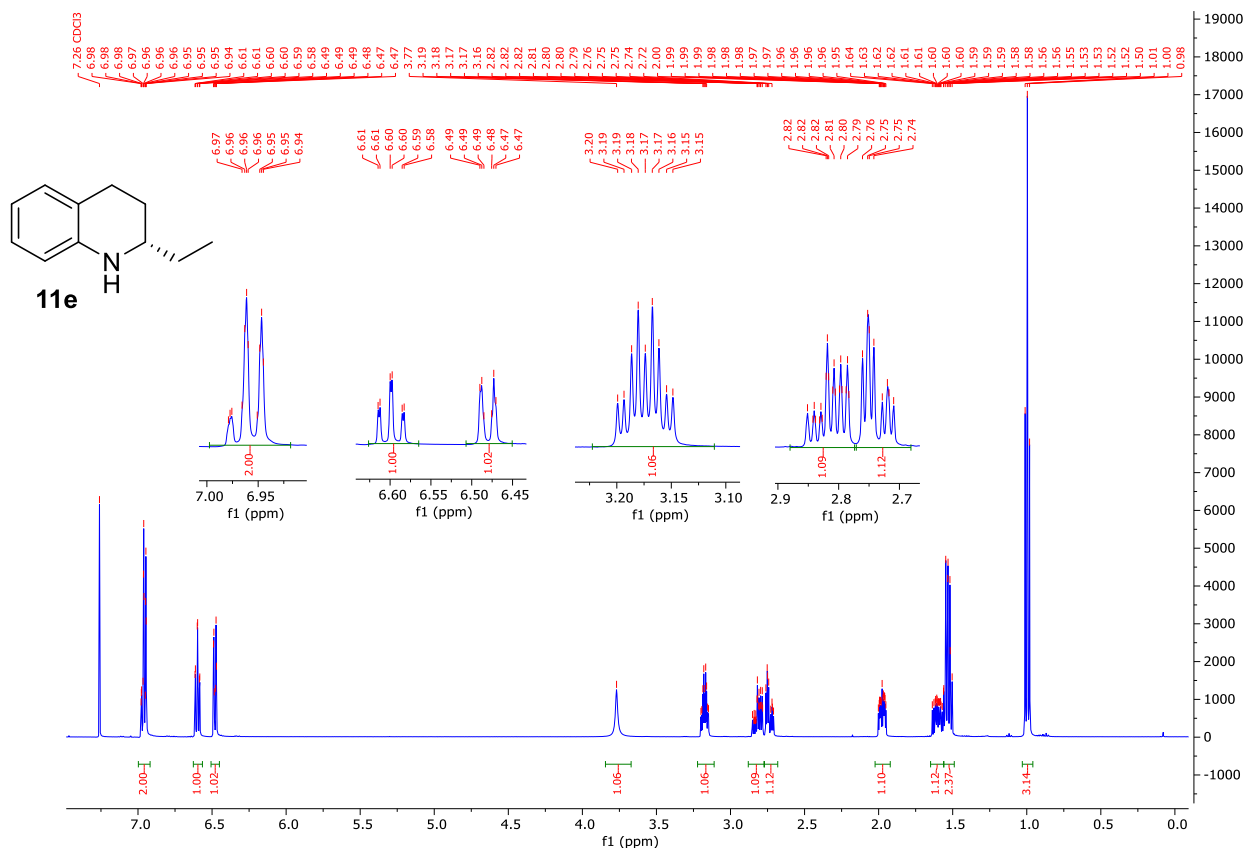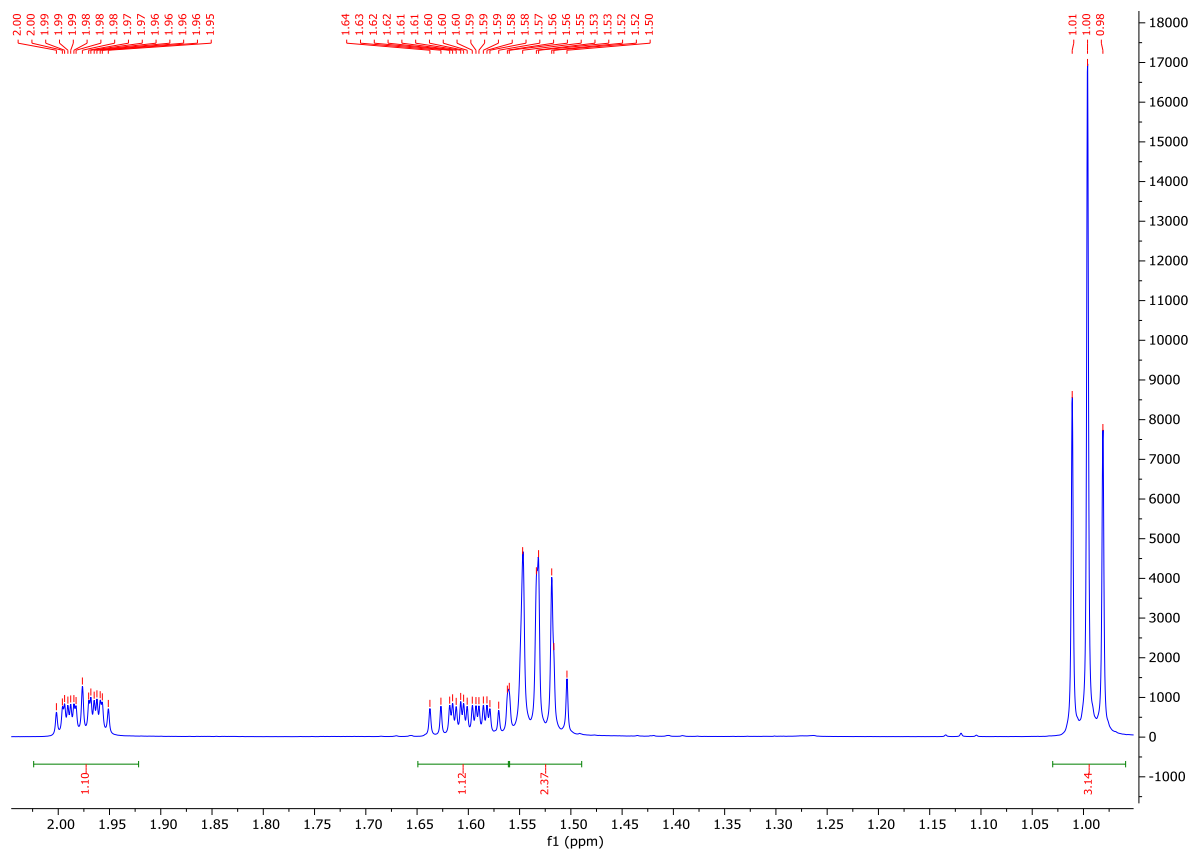

### <sup>13</sup>C NMR of 11e

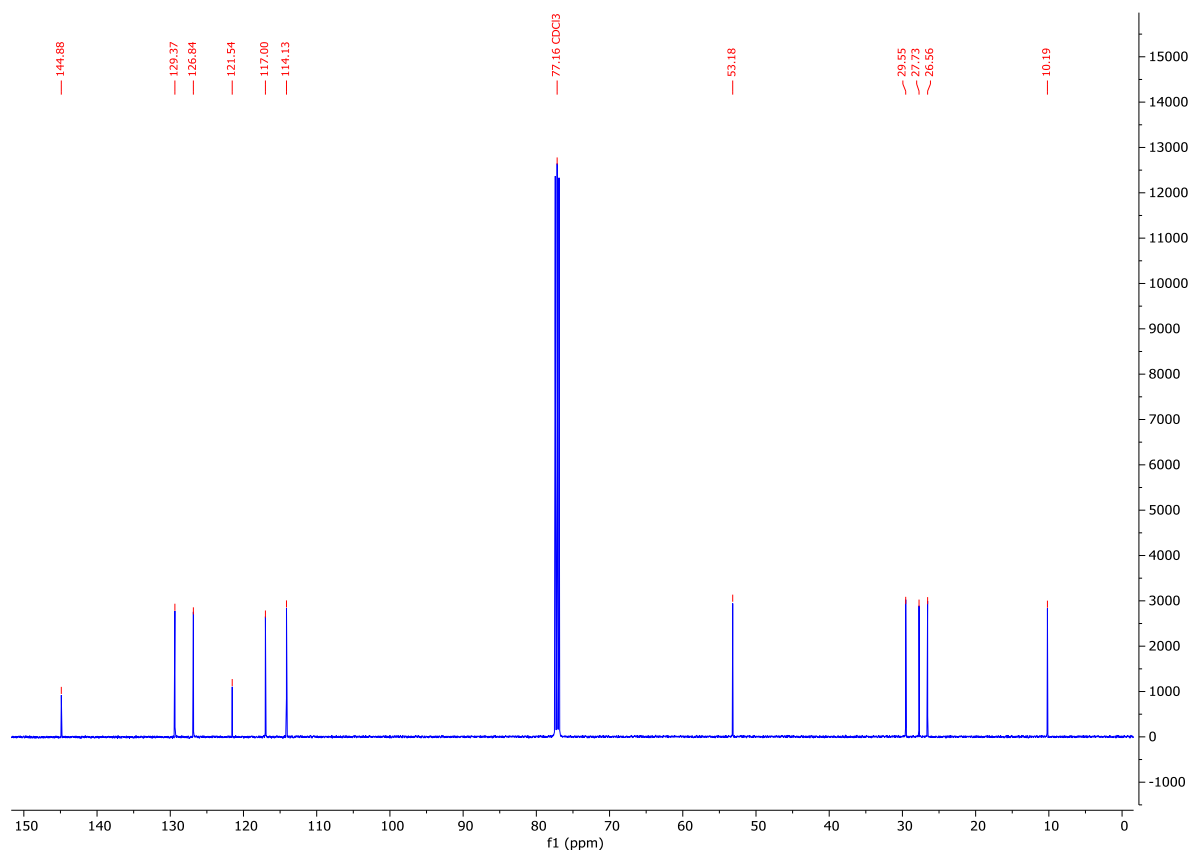

### Chiral HPLC Chromatograms of 11e

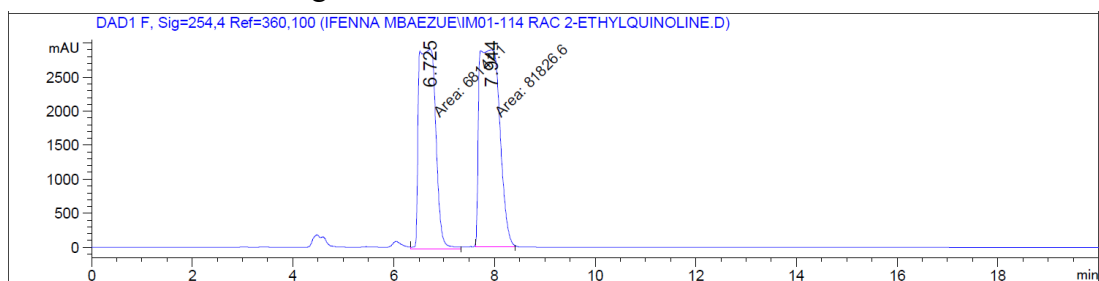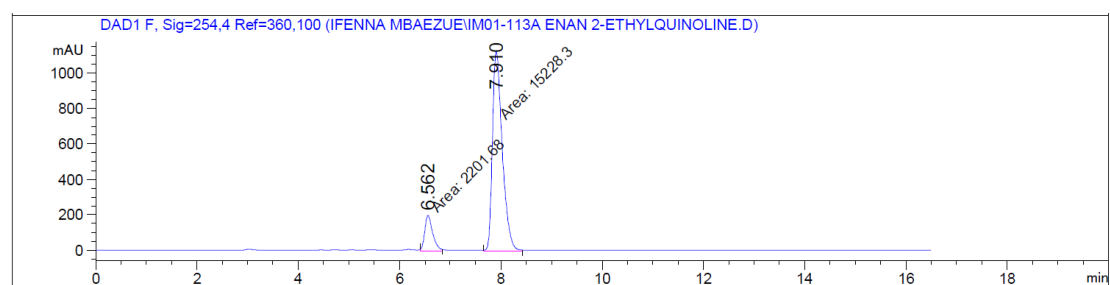

| Peak # | RetTime [min] | Type | Width [min] | Area [mAU*s] | Height [mAU] | Area %  |
|--------|---------------|------|-------------|--------------|--------------|---------|
| 1      | 6.562         | MM   | 0.1823      | 2201.67993   | 201.33543    | 12.6316 |
| 2      | 7.910         | MM   | 0.2248      | 1.52283e4    | 1129.25708   | 87.3684 |





### <sup>13</sup>C NMR of **11f**

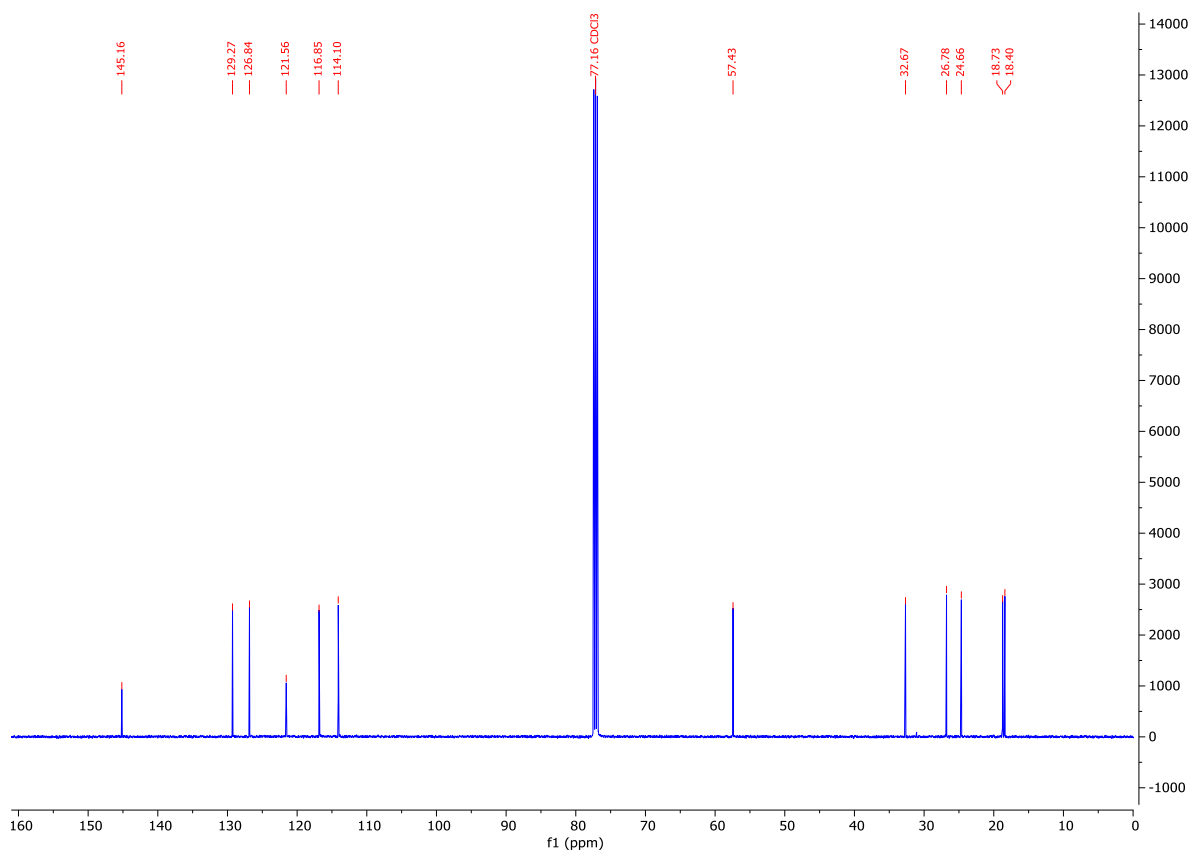

### Chiral HPLC Chromatograms of **11f**

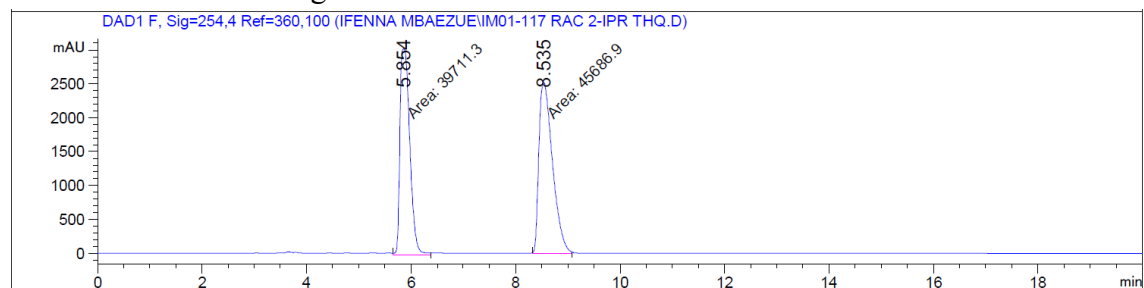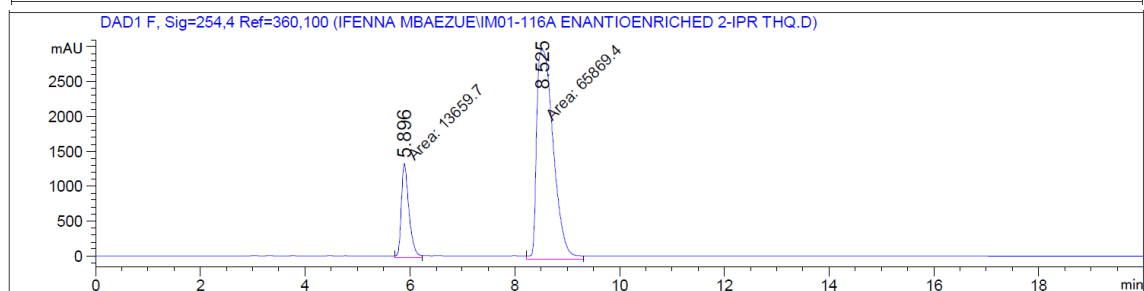

| Peak # | RetTime [min] | Type | Width [min] | Area [mAU*s] | Height [mAU] | Area %  |
|--------|---------------|------|-------------|--------------|--------------|---------|
| 1      | 5.896         | MM   | 0.1692      | 1.36597e4    | 1345.61450   | 17.1757 |
| 2      | 8.525         | MM   | 0.3666      | 6.58694e4    | 2994.45923   | 82.8243 |

(S)-2-methyl-6-nitro-1,2,3,4-tetrahydroquinoline (**11g**)

<sup>1</sup>H NMR of **11g**

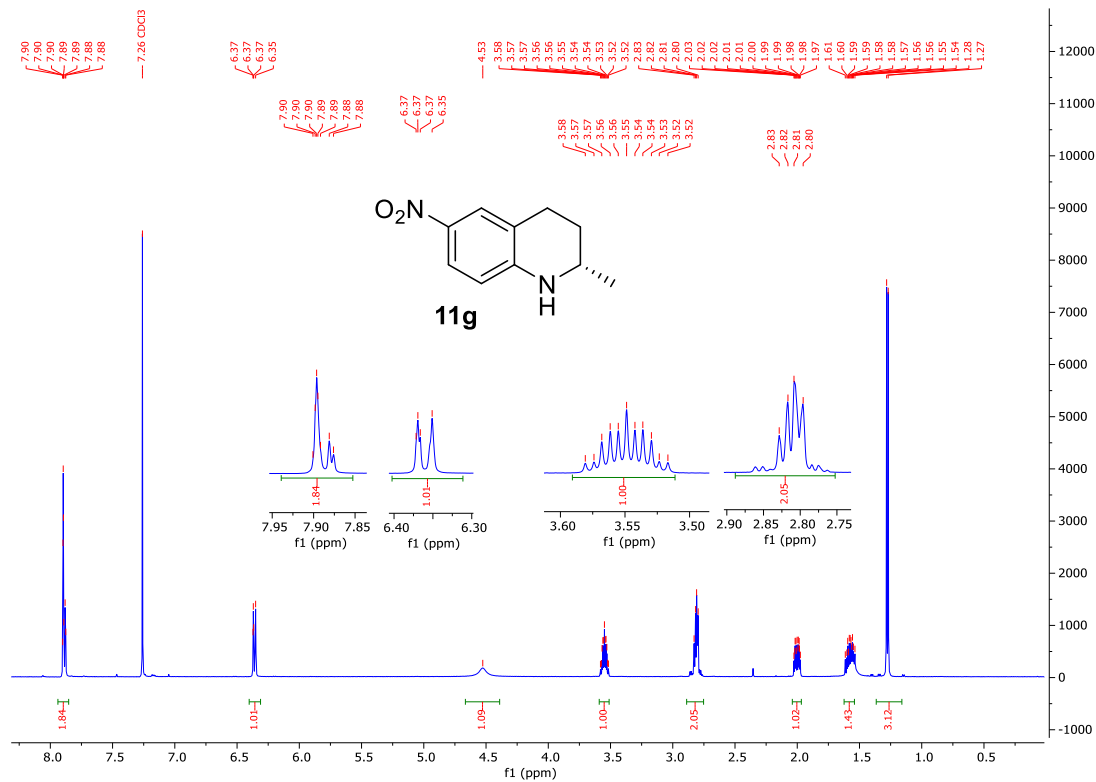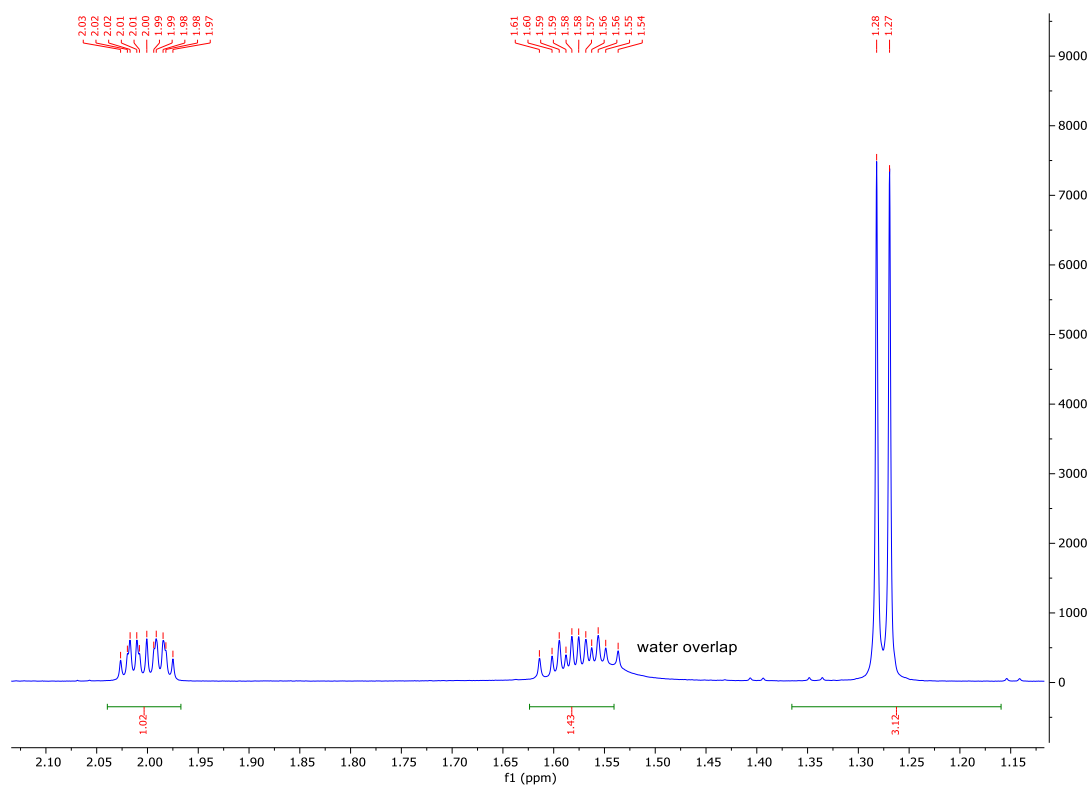

### <sup>13</sup>C NMR of **11g**

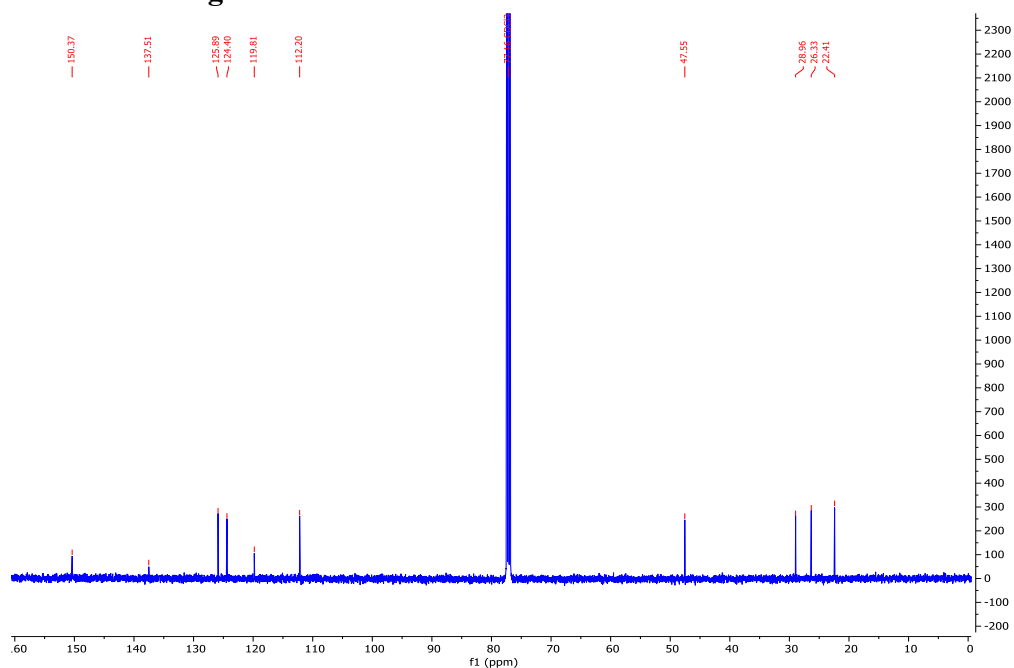

### Chiral HPLC Chromatogram of **11g**

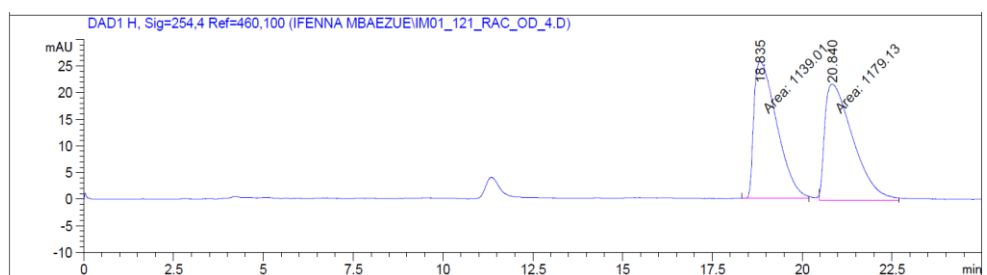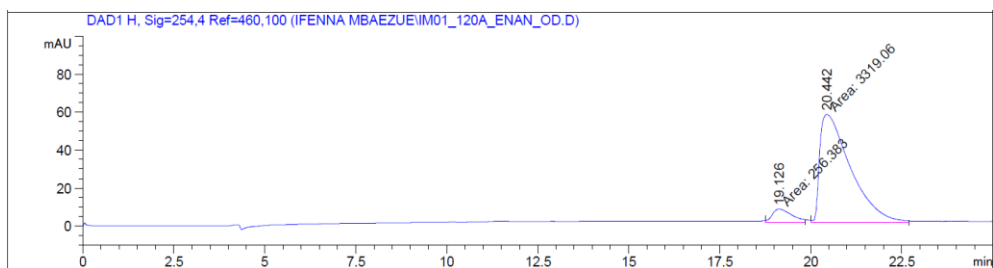

| Peak # | RetTime [min] | Type | Width [min] | Area [mAU*s] | Height [mAU] | Area %  |
|--------|---------------|------|-------------|--------------|--------------|---------|
| 1      | 19.126        | MM   | 0.6119      | 256.38251    | 6.98332      | 7.1706  |
| 2      | 20.442        | MM   | 0.9745      | 3319.06494   | 56.76318     | 92.8294 |

## Chiral HPLC Chromatogram of crystallized product **11g**

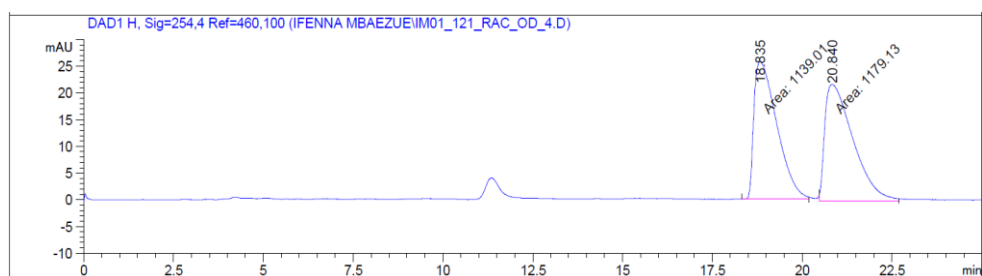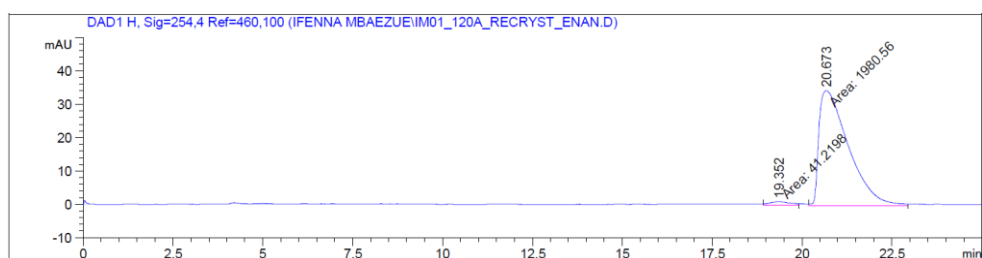

| Peak # | RetTime [min] | Type | Width [min] | Area [mAU*s] | Height [mAU] | Area %  |
|--------|---------------|------|-------------|--------------|--------------|---------|
| 1      | 19.352        | MM   | 0.6727      | 41.21978     | 1.02125      | 2.0388  |
| 2      | 20.673        | MM   | 0.9551      | 1980.56396   | 34.56263     | 97.9612 |

<sup>1</sup>H NMR of 11h

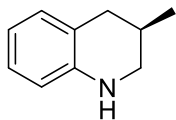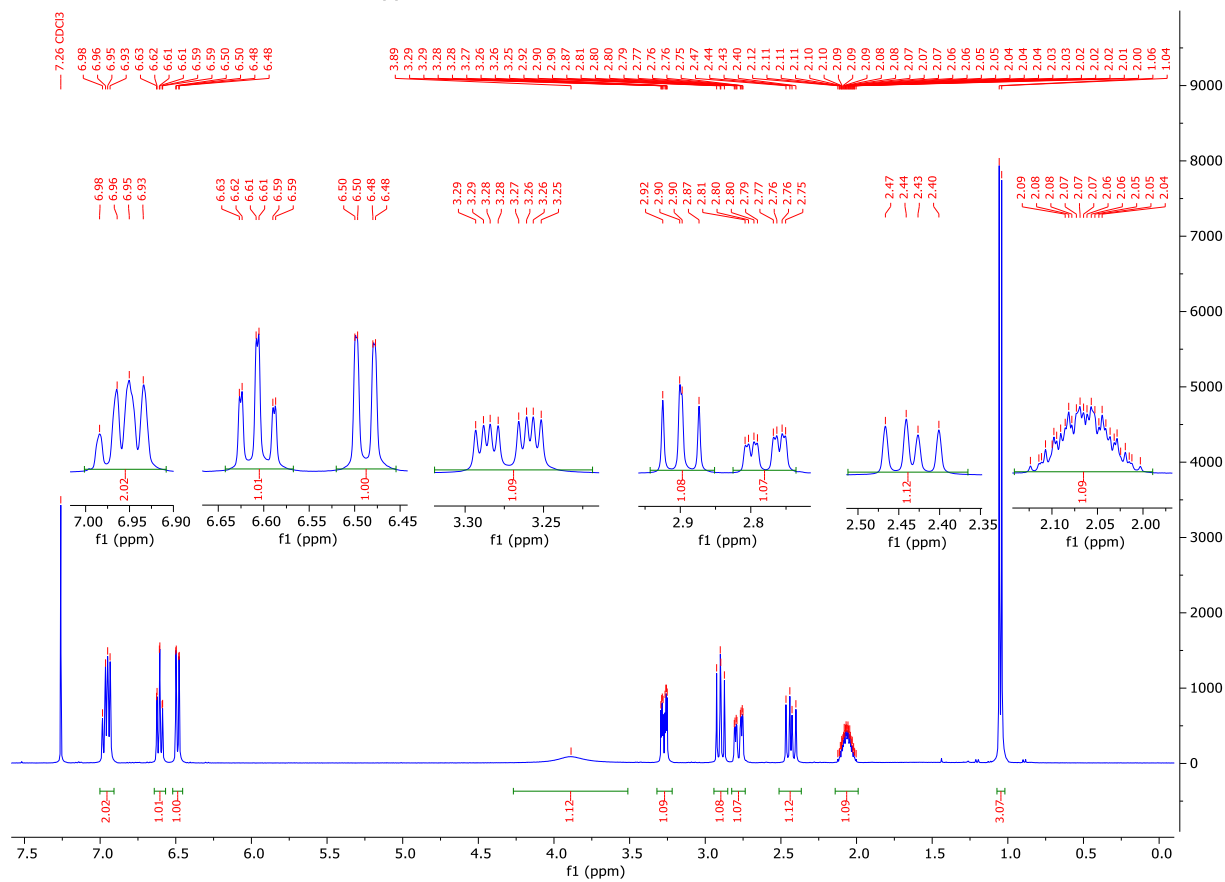

### <sup>13</sup>C NMR of **11h**

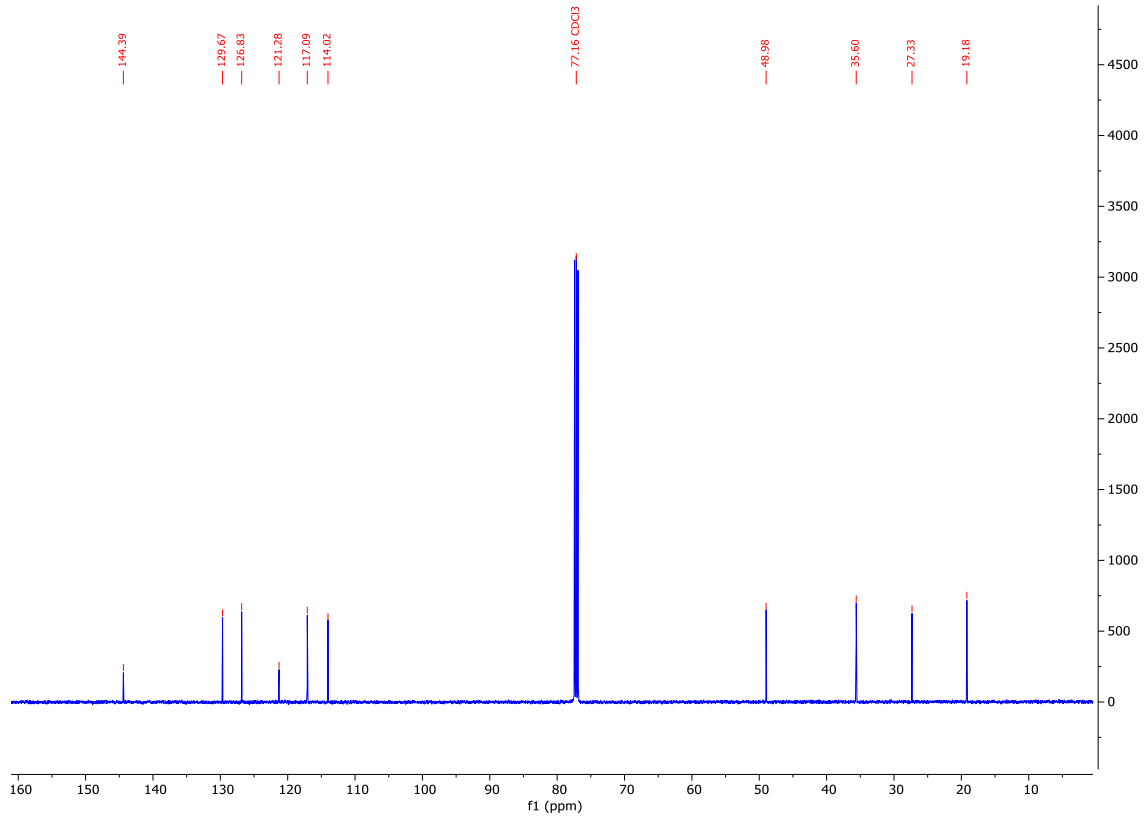

### Chiral HPLC Chromatograms of **11h**

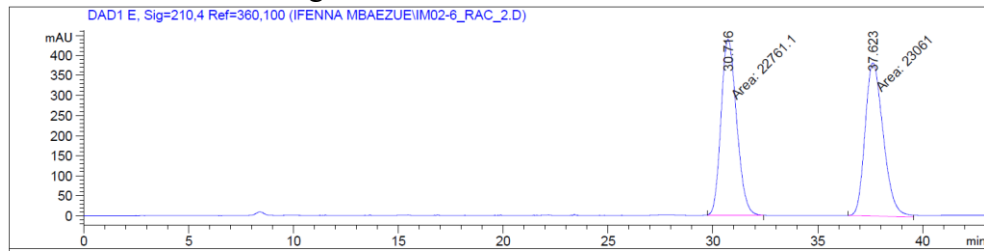

# <sup>1</sup>H NMR of 11i

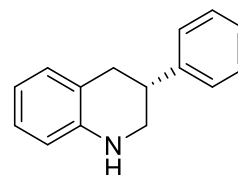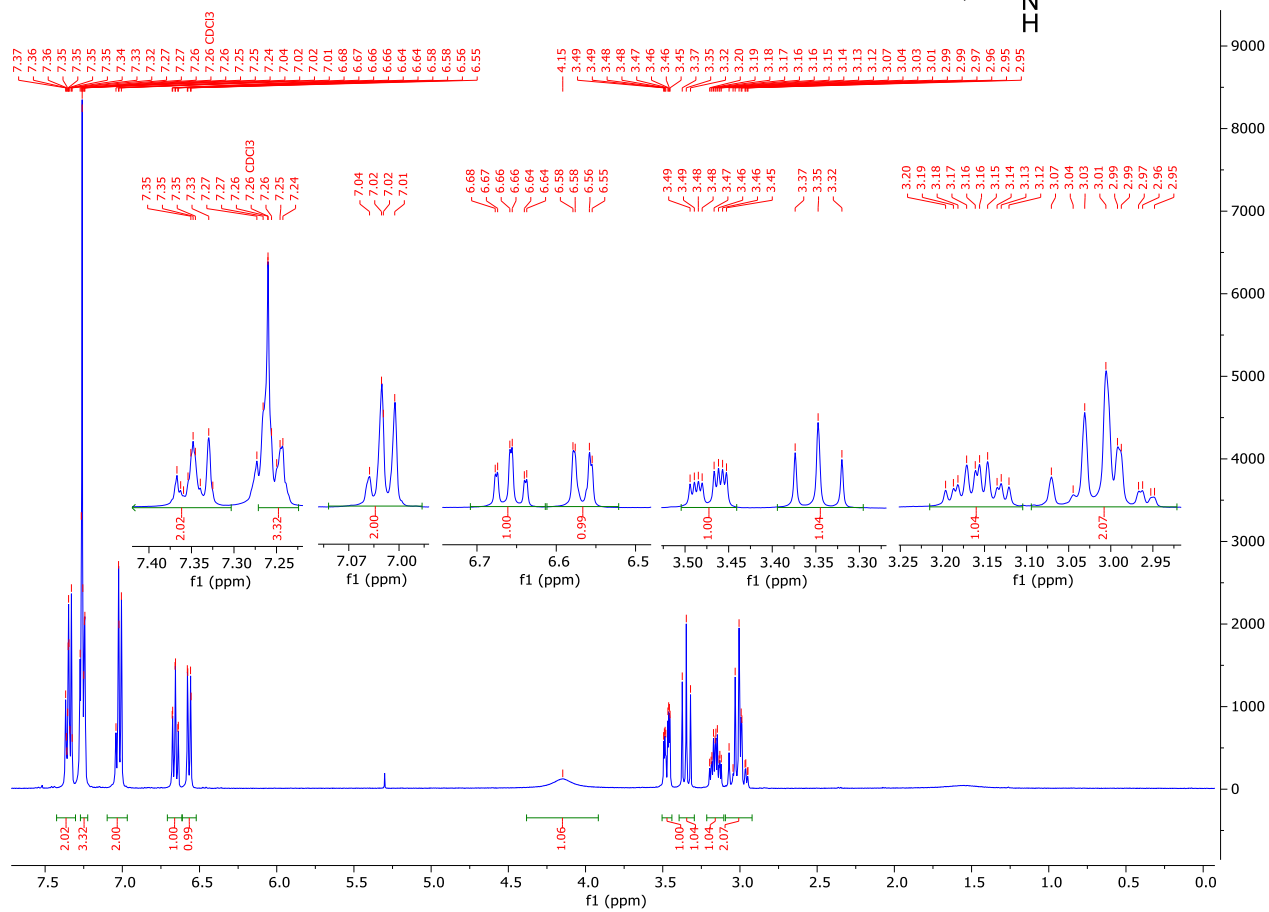

### <sup>13</sup>C NMR of **11i**

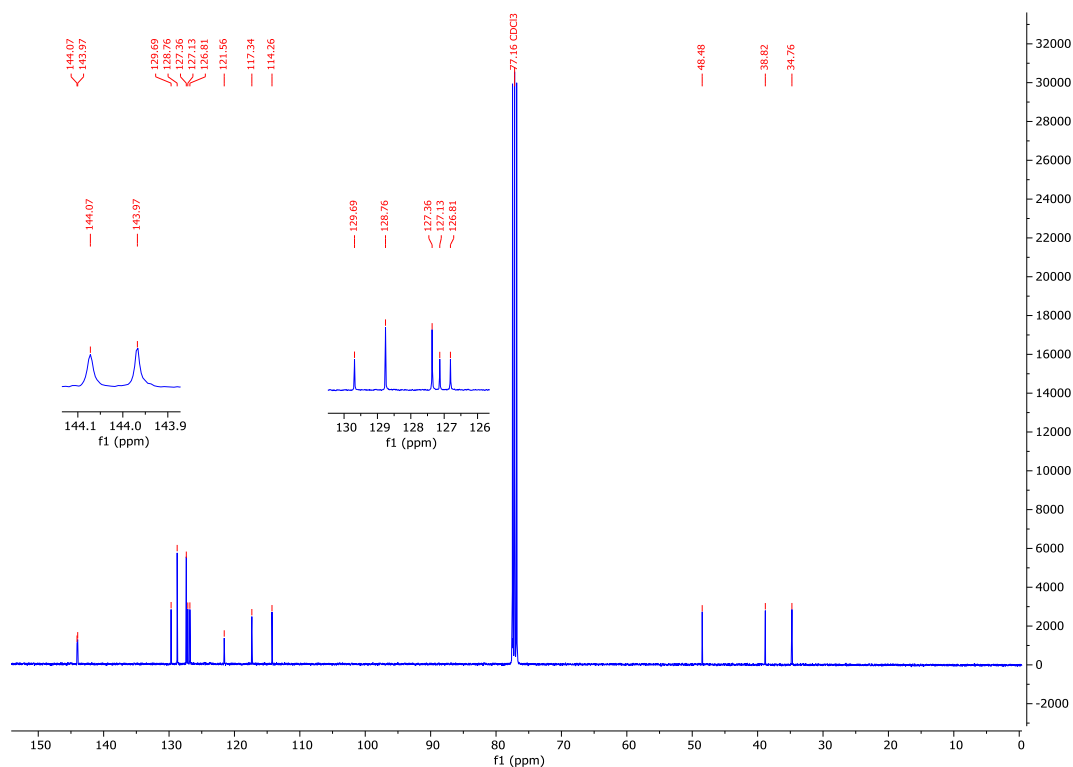

### Chiral HPLC Chromatograms of **11i**

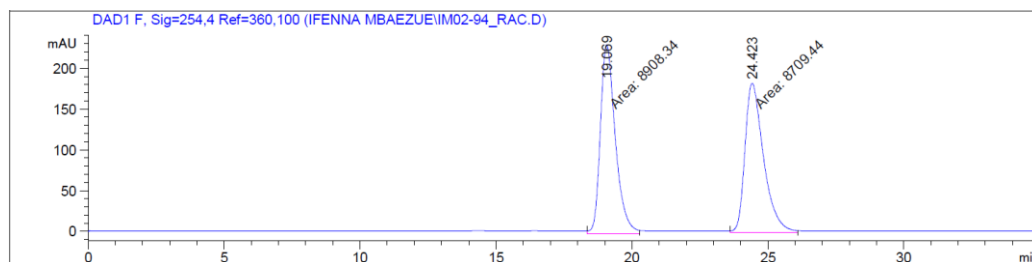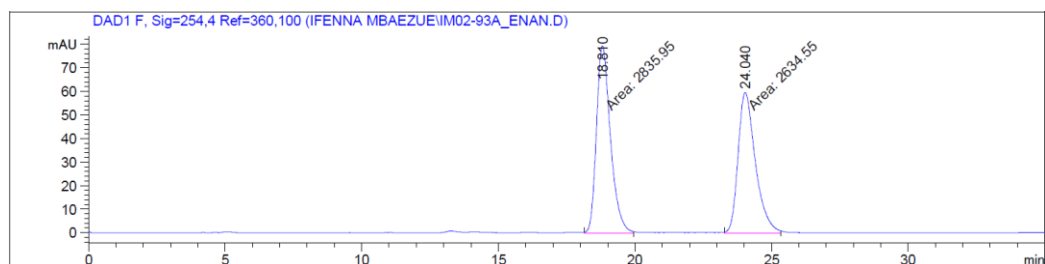

Signal 6: DAD1 F, Sig=254,4 Ref=360,100

| Peak # | RetTime [min] | Type | Width [min] | Area [mAU*s] | Height [mAU] | Area %  |
|--------|---------------|------|-------------|--------------|--------------|---------|
| 1      | 18.810        | MM   | 0.5948      | 2835.94873   | 79.46480     | 51.8408 |
| 2      | 24.040        | MM   | 0.7355      | 2634.54956   | 59.70087     | 48.1592 |

Totals : 5470.49829 139.16567



# <sup>1</sup>H NMR of 11j

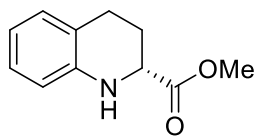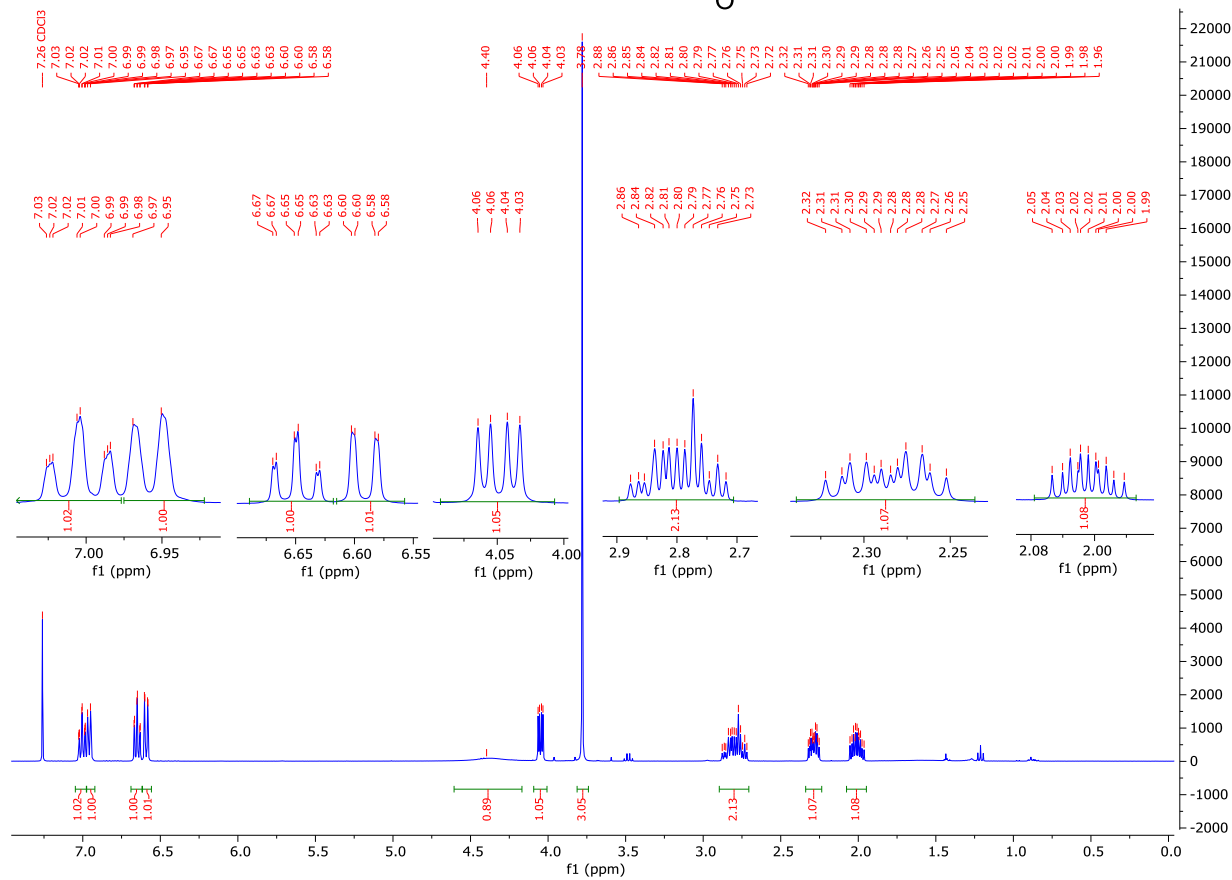

# <sup>13</sup>C NMR of 11j

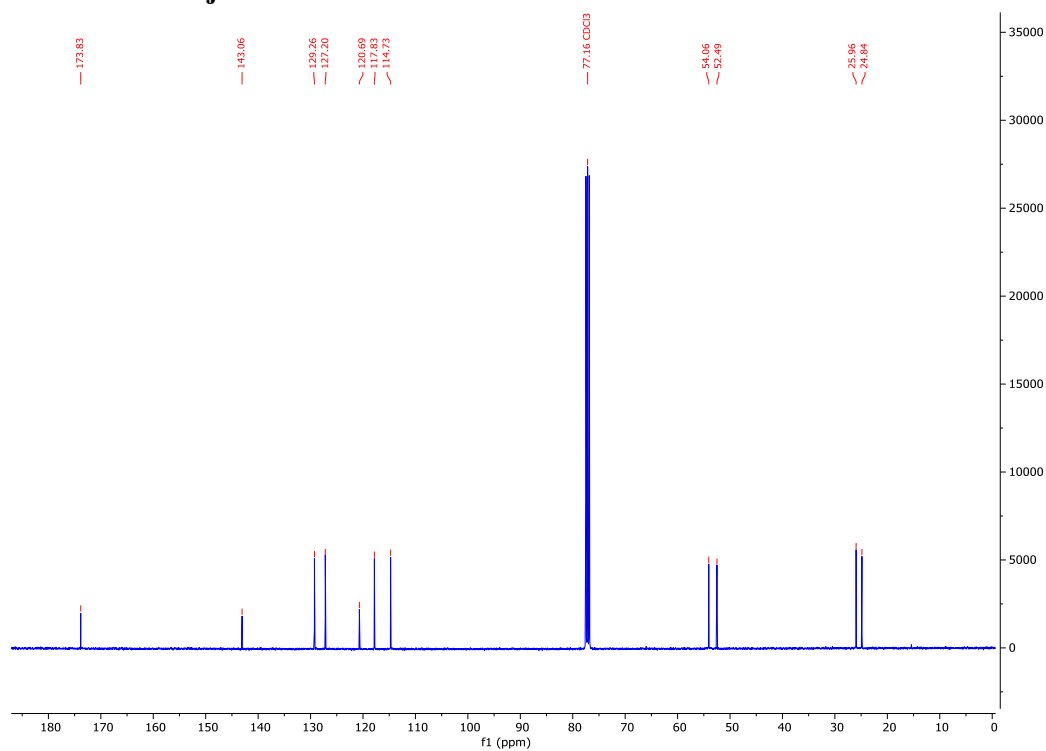



## X-Ray Data Collection and Structural Refinement Statistics

The X-ray data were collected on a Bruker D8 Venture dual-source diffractometer equipped with a PHOTON II detector and an Oxford Cryostream 800 cooling system, using mirror-monochromatized CuK $\alpha$  radiation ( $\lambda = 1.54184 \text{ \AA}$ ) from a microfocus source, in a series of  $\varphi$ - and  $\omega$ -scans. APEX3 software was used for data collection, integration and reduction.<sup>17</sup> Semi-empirical absorption correction was applied using SADABS-2016/2.<sup>18</sup>

The structures were solved using SHELXT-2014/5 (**5a\_123K**, **11a\_253K**) or SHELXT-2018/2 (**5c\_253K**, **8d\_253K**)<sup>19</sup> and refined by full-matrix least-squares using SHELXL-2018/3<sup>20</sup> within Olex2<sup>21</sup> and WinGX<sup>22</sup> packages. All non-hydrogen atoms were refined anisotropically. All carbon-bound hydrogen atoms were calculated to their optimal positions and treated as riding atoms using isotropic displacement parameters 1.2 (or 1.5 in case of methyl groups) times larger than the respective parent atoms. Nitrogen- and oxygen-bound hydrogen atoms were found in the difference electron density map and were modelled as constrained, with isotropic displacement parameters 1.2 (for nitrogen-bound) or 1.5 (for oxygen-bound) times larger than those of the respective parent atoms. In case of **11a\_253K**, the amino group was instead allowed to refine as a rigid body to allow for the partial sp<sup>3</sup> character of the nitrogen, i.e. the out-of-plane position of the attached hydrogen atom. For disordered moieties, 1,2- and 1,3-interatomic distances were restrained to be equal and the anisotropic displacement parameters of the atoms were restrained to be equal for bonded and spatially close atoms. In case of **5c\_253K**, the minor disorder component of the 2,4,6-triisopropylbenzenesulfonyl group was partially refined as a rigid body including the benzene ring with the attached secondary carbon atoms of isopropyl groups and the sulfonyl ( $-\text{SO}_2-$ ) group. The occupancies of the disordered moieties were either allowed to refine freely (**5c\_253K**) or were fixed to 0.5 as required by the proximity of a two-fold rotation axis (**8d\_253K**).

CCDC 1935843–1935846 contain the supplementary crystallographic data for this paper. The data can be obtained free of charge from The Cambridge Crystallographic Data Centre via [www.ccdc.cam.ac.uk/structures](http://www.ccdc.cam.ac.uk/structures).

**Table 3.** Crystallographic data

| Complex                                                      | <b>5a 123K</b>                                                            | <b>5c 253K</b>                                                            | <b>8d 253K</b>                                                                               | <b>11a 253K</b>                                                           |
|--------------------------------------------------------------|---------------------------------------------------------------------------|---------------------------------------------------------------------------|----------------------------------------------------------------------------------------------|---------------------------------------------------------------------------|
| CCDC Number                                                  | 1935843                                                                   | 1935844                                                                   | 1935845                                                                                      | 1935846                                                                   |
| Empirical formula                                            | C <sub>25</sub> H <sub>38</sub> NO <sub>4</sub> PS                        | C <sub>30</sub> H <sub>44</sub> NO <sub>5</sub> PS                        | C <sub>31</sub> H <sub>42</sub> Cl <sub>2</sub> N <sub>2</sub> O <sub>4</sub> P <sub>2</sub> | C <sub>10</sub> H <sub>12</sub> BrN                                       |
| Formula weight                                               | 479.59                                                                    | 561.69                                                                    | 639.50                                                                                       | 226.12                                                                    |
| <i>T</i> /K                                                  | 123.0(1)                                                                  | 253.0(1)                                                                  | 253.0(1)                                                                                     | 253.0(1)                                                                  |
| Crystal system                                               | Monoclinic                                                                | Orthorhombic                                                              | Tetragonal                                                                                   | Orthorhombic                                                              |
| Space group                                                  | <i>P</i> 2 <sub>1</sub>                                                   | <i>P</i> 2 <sub>1</sub> 2 <sub>1</sub> 2 <sub>1</sub>                     | <i>P</i> 4 <sub>1</sub> 2 <sub>1</sub> 2                                                     | <i>P</i> 2 <sub>1</sub> 2 <sub>1</sub> 2 <sub>1</sub>                     |
| <i>a</i> /Å                                                  | 10.6790(7)                                                                | 10.5840(6)                                                                | 10.7127(2)                                                                                   | 16.0321(5)                                                                |
| <i>b</i> /Å                                                  | 12.0178(8)                                                                | 15.7917(8)                                                                | 10.7127(2)                                                                                   | 6.1532(2)                                                                 |
| <i>c</i> /Å                                                  | 11.2241(7)                                                                | 18.4493(10)                                                               | 27.9476(6)                                                                                   | 9.7828(3)                                                                 |
| $\alpha$ /°                                                  | 90                                                                        | 90                                                                        | 90                                                                                           | 90                                                                        |
| $\beta$ /°                                                   | 112.3257(14)                                                              | 90                                                                        | 90                                                                                           | 90                                                                        |
| $\gamma$ /°                                                  | 90                                                                        | 90                                                                        | 90                                                                                           | 90                                                                        |
| <i>V</i> /Å <sup>3</sup>                                     | 1332.50(15)                                                               | 3083.6(3)                                                                 | 3207.32(14)                                                                                  | 965.06(5)                                                                 |
| <i>Z</i>                                                     | 2                                                                         | 4                                                                         | 4                                                                                            | 4                                                                         |
| $\rho_{\text{calc}}$ /g cm <sup>-3</sup>                     | 1.195                                                                     | 1.210                                                                     | 1.324                                                                                        | 1.556                                                                     |
| $\mu$ /mm <sup>-1</sup>                                      | 1.878                                                                     | 1.721                                                                     | 3.070                                                                                        | 5.338                                                                     |
| Max. and min. transmission                                   | 0.7543 and 0.5780                                                         | 0.7536 and 0.6107                                                         | 0.7536 and 0.6332                                                                            | 0.7543 and 0.5764                                                         |
| <i>F</i> (000)                                               | 516.0                                                                     | 1208.0                                                                    | 1352.0                                                                                       | 456.0                                                                     |
| Crystal color and shape                                      | colorless, prism                                                          | yellow, lath                                                              | colorless, prism                                                                             | colorless, block                                                          |
| Crystal size/mm <sup>3</sup>                                 | 0.655×0.634×0.502                                                         | 0.644×0.628×0.384                                                         | 0.314×0.283×0.221                                                                            | 0.337×0.312×0.294                                                         |
| 2 $\theta$ range for data collection/°                       | 8.952 to 161.056                                                          | 7.368 to 145.612                                                          | 8.84 to 144.914                                                                              | 10.594 to 161.068                                                         |
| Index ranges                                                 | -13 ≤ <i>h</i> ≤ 13,<br>-15 ≤ <i>k</i> ≤ 14,<br>-14 ≤ <i>l</i> ≤ 14       | -13 ≤ <i>h</i> ≤ 13,<br>-19 ≤ <i>k</i> ≤ 19,<br>-22 ≤ <i>l</i> ≤ 22       | -13 ≤ <i>h</i> ≤ 13,<br>-13 ≤ <i>k</i> ≤ 13,<br>-34 ≤ <i>l</i> ≤ 32                          | -20 ≤ <i>h</i> ≤ 20,<br>-7 ≤ <i>k</i> ≤ 7,<br>-12 ≤ <i>l</i> ≤ 12         |
| Reflections collected                                        | 31499                                                                     | 60068                                                                     | 45989                                                                                        | 25154                                                                     |
| Reflections [ <i>R</i> <sub>int</sub> ]                      | 5643 [0.0313]                                                             | 6006 [0.0411]                                                             | 3167 [0.0835]                                                                                | 2073 [0.0457]                                                             |
| Data completeness (%)                                        | 99.5 to 2 $\theta$ = 135.500°                                             | 97.6 to 2 $\theta$ = 135.358°                                             | 99.2 to 2 $\theta$ = 135.500°                                                                | 97.6 to 2 $\theta$ = 135.358°                                             |
| Data/restraints/parameters                                   | 5643/1/300                                                                | 6006/981/483                                                              | 3167/20/208                                                                                  | 2073/0/114                                                                |
| Goodness-of-fit on <i>F</i> <sup>2</sup>                     | 1.034                                                                     | 1.137                                                                     | 1.054                                                                                        | 1.145                                                                     |
| Final <i>R</i> indices [ <i>I</i> > 2 $\sigma$ ( <i>I</i> )] | <i>R</i> <sub><i>I</i></sub> = 0.0271,<br><i>wR</i> <sub>2</sub> = 0.0709 | <i>R</i> <sub><i>I</i></sub> = 0.0437,<br><i>wR</i> <sub>2</sub> = 0.1133 | <i>R</i> <sub><i>I</i></sub> = 0.0278,<br><i>wR</i> <sub>2</sub> = 0.0741                    | <i>R</i> <sub><i>I</i></sub> = 0.0656,<br><i>wR</i> <sub>2</sub> = 0.1579 |
| Final <i>R</i> indices [all data]                            | <i>R</i> <sub><i>I</i></sub> = 0.0273,<br><i>wR</i> <sub>2</sub> = 0.0711 | <i>R</i> <sub><i>I</i></sub> = 0.0440,<br><i>wR</i> <sub>2</sub> = 0.1137 | <i>R</i> <sub><i>I</i></sub> = 0.0280,<br><i>wR</i> <sub>2</sub> = 0.0744                    | <i>R</i> <sub><i>I</i></sub> = 0.0662,<br><i>wR</i> <sub>2</sub> = 0.1581 |
| Largest diff. peak/hole ( <i>e</i> Å <sup>-3</sup> )         | 0.346/-0.258                                                              | 0.477/-0.282                                                              | 0.253/-0.190                                                                                 | 0.475/-0.632                                                              |
| Flack parameter <i>x</i>                                     | 0.014(9)                                                                  | 0.029(4)                                                                  | -0.007(5)                                                                                    | 0.050(18)                                                                 |
| Extinction coefficient                                       | 0.0090(10)                                                                | 0.0130(15)                                                                | -                                                                                            | 0.014(2)                                                                  |

---

## References

1. Qian, B.; Guo, S.; Shao, J.; Zhu, Q.; Yang, L.; Xia, C.; Huang, H. Palladium-Catalyzed Benzylic Addition of 2-Methyl Azaarenes to N-Sulfonyl Aldimines via C–H Bond Activation. *J. Am. Chem. Soc.* **2010**, *132*, 3650–3651.
2. Wen, J.; Tan, R.; Liu, S.; Zhao, Q.; Zhang, X. Strong Brønsted acid promoted asymmetric hydrogenation of isoquinolines and quinolines catalyzed by a Rh–thiourea chiral phosphine complex via anion binding. *Chem. Sci.*, **2016**, *7*, 3047–3051.
3. (a) Matsugi, M.; Tabusa, F.; Minamikawa, J. Doebner-Miller synthesis in a two-phase system: practical preparation of quinolines. *Tetrahedron Lett.* **2000**, *41*, 8523–8525. (b) Tahtaoui, C.; Guillier, F.; Klotz, P.; Galzi, J-L.; Hibert, M.; Ilien, B. On the Use of Nonfluorescent Dye Labeled Ligands in FRET-Based Receptor Binding Studies. *J. Med. Chem.* **2005**, *48*, 7847-7859.
4. Li, S.G.; Yuan, M.; Topic, F.; Han, Z.S.; Senanayake, C.H.; Tsantrizos, Y.S. Asymmetric library synthesis of *P*-chiral *t*-butyl-substituted secondary and tertiary phosphine oxides. *J. Org. Chem.* **2019**, *84*, 7291-7302.
5. Han, Z.S.; Wu, H.; Xu, Y.; Zhang, Y.; Qu, B.; Li, Z.; Caldwell, D.R.; Fandrick, K.R.; Zhang, L.; Roschangar, F.; Song, J.J.; Senanayake, C.H. General and stereoselective method for the synthesis of sterically congested and structurally diverse *P*-stereogenic secondary phosphine oxides. *Org. Lett.* **2017**, *19*, 1796.
6. Jolliffe, J.D.; Armstrong, R.J.; Smith, M.D. Catalytic enantioselective synthesis of atropisomeric biaryl by a cation-directed *O*-alkylation. *Nature Chem.* **2017**, *9*, 558-562.
7. Han, Z. S.; Zhang, L.; Xu, Y.; Sieber, J. D.; Marsini, M. A.; Li, Z.; Reeves, J. T.; Fandrick, K. R.; Patel, N. D.; Desrosiers, J.; Qu, B.; Chen, A.; Rudzinski, D. M.; Samankumara, L. P.; Ma, S.; Grinberg, N.; Roschangar, F.; Yee, N. K.; Wang, G.; Song, J. J.; Senanayake, C. H. Efficient asymmetric synthesis of structurally diverse *P*-stereogenic phosphinamides for catalyst design. *Angew. Chem. Int. Ed.* **2015**, *54*, 5474-5477.
8. Han, Z.S.; Wu, H.; Qu, B.; Wang, Y.; Wu, L.; Zhang, L.; Xu, Y.; Wu, L.; Zhang, Y.; Lee, H.; Roschangar, F.; Song, J.J.; Senanayake, C.H. New class of *P*-stereogenic chiral Brønsted acids catalysts derived from chiral phosphinamides. *Tetrahedron Lett.* **2019**, *60*, 1834-1837.
9. Yang, T.; Yin, Q.; Gu, G.; Zhang, X. A one-pot process for the enantioselective synthesis of tetrahydroquinolines and tetrahydroisoquinolines via asymmetric reductive amination (ARA). *Chem. Commun.* **2018**, *54*, 7247-7250.
10. Wang, C.; Li, C.; Wu, X.; Pettman A.; Xiao, J. pH-Regulated Asymmetric Transfer Hydrogenation of Quinolines in Water. *Angew. Chem. Int. Ed.* **2009**, *48*, 6524–6528.

- 
11. Rueping, M.; Theissmann, T.; Stoeckel, M.; Antonchick, A. P. Direct enantioselective access to 4-substituted tetrahydroquinolines by catalytic asymmetric transfer hydrogenation of quinolines *Org. Biomol. Chem.* **2011**, *9*, 6844–6850
12. Gou, F-R.; Zhang, X.; Liang, Y-M. Iridium-Catalyzed Asymmetric Hydrogenation of Quinoline Derivatives with C3\*-TunePhos. *Adv. Synth. Catal.* **2010**, *352*, 2441-2444.
13. Zhao, X.; Xiao, J.; Tang, W. Enantioselective reduction of 3-substituted quinolones with a cyclopentadiene-based chiral Brønsted acid. *Synthesis*, **2017**, *49*, 3157–3164.
14. Batsyts, S.; Vedmid, R.; Namyslo, J. C.; Nieger, M.; Schmidt, A. 3-Aryl substituted 1-methylquinolinium salts as carbene precursors. *Eur. J. Org. Chem.*, **2019**, 1301–1310.
15. Rueping, M.; Theissmann, T.; Raja, S.; Bats, J. W. Asymmetric counterion pair catalysis: An enantioselective Brønsted acid-catalyzed protonation. *Adv. Synth. Catal.* **2008**, *350*, 1001-1006.
16. Takamura, M.; Funabashi, K.; Kanai, M.; Shibasaki, M. *J. Am. Chem. Soc.* **2000**, *122*, 6327-6328.
17. Bruker. APEX3. Bruker AXS Inc., Madison, Wisconsin, USA, 2012.
18. Krause, L.; Herbst-Irmer, R.; Sheldrick, G.M.; Stalke, D. Comparison of silver and molybdenum microfocus X-ray sources for single-crystal structure determination. *J. Appl. Cryst.* **2015**, *48*, 3.
19. Sheldrick, G. M. *SHELXT* – Integrated space-group and crystal-structure determination. *Acta Cryst.* **2015**, *A71*, 3.
20. Sheldrick, G. M. Crystal structure refinement with SHELXL. *Acta Cryst.* **2015**, *C71*, 3.
21. Dolomanov, O.V.; Bourhis, L.J.; Gildea, R.J.; Howard, J. A. K.; Puschmann, H. *OLEX2*: a complete structure solution, refinement and analysis program. *J. Appl. Cryst.* **2009**, *42*, 339.
22. Farrugia, L. J. *WinGX* and *ORTEP* for Windows: an update. *J. Appl. Cryst.* **2012**, *45*, 849.
